1 **Genomic bases of insularity and ecological**  
2 **divergence in barn owls (*Tyto alba*) of the Canary**  
3 **Islands**

4

5 Tristan Cumer<sup>1\*Δ</sup>, Ana Paula Machado<sup>1Δ</sup>, Felipe Siverio<sup>2</sup>, Sidi Imad Cherkaoui<sup>3</sup>, Inês Roque<sup>4</sup>, Rui  
6 Lourenço<sup>4</sup>, Motti Charter<sup>5,6</sup>, Alexandre Roulin<sup>1†</sup>, Jérôme Goudet<sup>1,7\*†</sup>

7 \* corresponding author

8 Δ co-first authors – sorted alphabetically

9 † co-senior authors

10

11 Contact details for corresponding author: Department of Ecology and Evolution, Biophore  
12 Building, University of Lausanne, CH-1015 Lausanne, Switzerland. Email: [tristan.cumer@unil.ch](mailto:tristan.cumer@unil.ch);  
13 [Jerome.goudet@unil.ch](mailto:Jerome.goudet@unil.ch)

14

15 <sup>1</sup> Department of Ecology and Evolution, University of Lausanne, Lausanne, Switzerland

16 <sup>2</sup> Canary Islands' Ornithology and Natural History Group (GOHNIC), 38480 Buenavista del Norte,  
17 Tenerife, Canary Islands, Spain

18 <sup>3</sup> Ecole Supérieure de Technologie de Kénitra, Ibn Tofail University, Kénitra, Morocco

19 <sup>4</sup> Mediterranean Institute for Agriculture, Environment and Development, Laboratory of  
20 Ornithology, IIFA, University of Évora, Évora, Portugal

21 <sup>5</sup> Shamir Research Institute, University of Haifa, Katzrin, Israel

22 <sup>6</sup> Department of Geography and Environmental Sciences, University of Haifa, Haifa, Israel

23 <sup>7</sup> Swiss Institute of Bioinformatics, Lausanne, Switzerland

24

25 **Orcid**

26 **Tristan Cumer - 0000-0002-0276-7462**

27 **Ana Paula Machado - 0000-0001-9203-7000**

28 **Felipe Siverio - 0000-0002-0324-0646**

29 **Sidi Imad Cherkaoui - 0000-0002-3349-4321**

30 **Inês Roque - 0000-0002-5952-5915**

31 **Rui Lourenço - 0000-0001-7694-0478**

32 **Motti Charter - 0000-0003-3861-6356**

33 **Alexandre Roulin - 0000-0003-1940-6927**

34 **Jérôme Goudet - 0000-0002-5318-7601**

35

## 36 Abstract

37 Islands, and the particular organisms that populate them, have long fascinated biologists. Due  
38 to their isolation, islands offer unique opportunities to study the effect of neutral and adaptive  
39 mechanisms in determining genomic and phenotypical divergence. In the Canary Islands, an  
40 archipelago rich in endemics, the barn owl (*Tyto alba*) is thought to have diverged into a  
41 subspecies (*T. a. gracilirostris*) on the eastern islands, Fuerteventura and Lanzarote. Taking  
42 advantage of 40 whole-genomes and modern population genomics tools, we provide the first  
43 look at the origin and genetic makeup of barn owls of this archipelago. We show that the  
44 Canaries hold diverse, long-standing and monophyletic populations with a neat distinction of  
45 gene pools from the different islands. Using new method, less sensitive to structure than  
46 classical  $F_{ST}$ , to detect regions involved in local adaptation to the insular environment, we  
47 identified a haplotype-like region likely under positive selection in all Canaries individuals. Genes  
48 in this region suggest morphological adaptations to insularity. In the eastern islands, where the  
49 subspecies *T. a. gracilirostris* is present, genomic traces of selection pinpoint signs of locally  
50 adapted body proportions and blood pressure, consistent with the smaller size of this population  
51 living in a hot arid climate. In turn, genomic regions under selection in the western barn owls  
52 from Tenerife showed an enrichment in genes linked to hypoxia, a potential response to  
53 inhabiting a small island with a marked altitudinal gradient. Our results illustrate the interplay of  
54 neutral and adaptive forces in shaping divergence and early onset speciation.

55

56 **Key words** – Local adaptation; Niche analysis; Population genomics; *T. a. gracilirostris*; Whole  
57 genome sequencing

58

## 59 Introduction

60 Due to the often-peculiar organisms that inhabit them, islands have always fascinated  
61 naturalists and scientists alike. Since Darwin's first visit to the Galapagos in 1835, the study of  
62 insular populations has been crucial to the development of evolutionary theory (MacArthur and  
63 Wilson 1967; Grant 1998; Warren et al. 2015). Labelled nature's test tubes, islands are home to  
64 a myriad of endemic (sub)species. Moreover, the combination of their relatively small size,  
65 discrete borders, geographical isolation and natural replication provides an excellent setting to  
66 study the evolutionary forces underlying population divergence and speciation (Losos and  
67 Ricklefs 2009). The divergence of insular populations from their founders and surrounding  
68 islands is the result of neutral and selective forces. Disentangling the respective impacts of  
69 these two forces is a challenging task, as they are interconnected and can both contribute to  
70 genetic and phenotypic differentiation.

71 Isolated and small populations, such as those frequently found on islands, are under a markedly  
72 strong influence of genetic drift. This process will alter the genetic makeup of the population by  
73 randomly removing rare alleles and fixating common ones, hence decreasing genetic diversity  
74 (Frankham 1997). This is a common occurrence on islands which, coupled with low gene flow,  
75 can lead to inbreeding (Keller and Waller 2002) and accelerate neutral divergence. Conversely,  
76 the absence of regular gene flow, and the often distinctive ecological conditions of the islands,  
77 can facilitate the action of local adaptation on beneficial alleles (Lenormand 2002; Tigano and  
78 Friesen 2016). This process can lead to the emergence of ecomorphs via ecological divergence  
79 as populations adapt to unfilled insular niches (Losos and Ricklefs 2009), particularly so in  
80 remote islands that are colonized less often (MacArthur and Wilson 1963). Ecomorphs can  
81 occur in different islands or in the same one (Gillespie et al. 1997; Losos et al. 1998; Gillespie  
82 2004), a concept mirrored in inland lakes (Malinsky et al. 2015), the aquatic homologous of  
83 islands. Eventually, ecomorphs can become new subspecies or even species and, in extreme  
84 cases, result in adaptive radiations as illustrated by Darwin's finches (Grant 1999; Lamichhaney  
85 et al. 2015).

86 The Afro-European barn owl (*Tyto alba*) is a non-migratory, nocturnal raptor present from  
87 Scandinavia to Southern Africa. It is also found on numerous islands and archipelagos where  
88 subspecies have often been described (Uva et al. 2018). A recent study of the species' genetic  
89 structure in the Western Palearctic (Cumer et al. 2021) described two main lineages occupying  
90 this region: the eastern lineage in the Levant and the western in Europe. In addition, Cumer et  
91 al. (2021) showed that barn owls from Tenerife (Canary Islands) were very distinct from both  
92 lineages. The Canaries are a volcanic archipelago that was formed several million years ago  
93 (Anguita and Hernán 2000) about 100 km from the coast of north-western Africa and was never  
94 connected to the mainland. This long-term isolation (Norder et al. 2019), along with its  
95 subtropical climate and elevation gradients (Steinbauer et al. 2016), has resulted in high  
96 endemism, for example in plants (Carine et al. 2009), reptiles (Thorpe and Baez 1993; Nogales  
97 et al. 1998; Nogales et al. 2001; Molina-Borja 2003; Mateo et al. 2011), mammals (Hutterer et  
98 al. 1987; Pestano et al. 2003; Firmat et al. 2010; Masseti 2010) and birds (Illera et al. 2016;  
99 Lifjeld et al. 2016; González Melián 2018; Senfeld et al. 2020). Among them, an endemic barn  
100 owl subspecies, *T. a. gracilirostris* (Hartert, E, 1905), has been described based on its  
101 morphological traits, especially for its smaller size and darker coloration (Bannerman and  
102 Bannerman 1963; Clements et al. 2019). This subspecies is recorded in the eastern Canary  
103 Islands of Lanzarote and Fuerteventura, as well as in its surrounding islets (Lobos, Alegranza,  
104 Montaña Clara and La Graciosa), and is the only barn owl in this sector of the archipelago  
105 (Siverio 2007).

106 The presence of this subspecies on the eastern islands is surprising however, given that it is  
107 sandwiched between the western islands and the mainland which both harbour the nominal  
108 species *T. alba*. Lacking any evidence of different colonization origins or timing, this could  
109 suggest that selection to local conditions acting on the eastern population has accelerated  
110 divergence in comparison to the western one. In both cases, neutral and adaptive  
111 microevolutionary processes promoting divergence of insular populations would leave traces on  
112 their genomic makeup. The advances in sequencing technology, and its decreasing costs, now  
113 allow to sequence the entire genomes of individuals. With the parallel development of

114 sophisticated tools, it is possible to analyse changes in allelic frequencies at a high resolution to  
115 investigate the history of populations and inspect the genomic landscape for signals of local  
116 adaptation.

117 Here, we investigate the genomic bases of differentiation of barn owls from the Canary Islands.  
118 Making use of the whole-genome sequences from 40 individuals, we first describe the neutral  
119 genetic structure and diversity of the Canaries populations in contrast to the mainland, in order  
120 to retrace their history. Second, we employ a new relatedness-based method to probe the  
121 genomic landscape of these isolated populations for signals of local adaptation to the insular  
122 environment in regards to the mainland. Third, we characterize the climatic niches barn owls  
123 occupy on eastern and western islands, and explore how each population is diverging to adapt  
124 to their niches from a genomic perspective. Our results elucidate the genomic bases of the  
125 differentiation of insular populations, thus enlightening the classification of the Canaries barn  
126 owls.

127

## 128 **Materials & Methods**

### 129 **Whole-genome sequencing, SNP calling and identification of coding regions**

130 For this study, 40 individual barn owls were sampled from four populations (Figure 1;  
131 Supplementary Table 1): Eastern Canaries (EC, Fuerteventura and Lanzarote), Western Canary  
132 (WC, Tenerife), Morocco (MA), Portugal (PT) and Israel (IS). All but the EC and MA populations  
133 were published in previous work, including a North American owl that was used as an outgroup  
134 for some analyses (Genbank accession JAEUGV000000000 (Cumer et al. 2021; Machado et al.  
135 2021). For EC and MA, we followed the same molecular and sequencing protocol as in the  
136 aforementioned publications. Succinctly, genomic DNA was extracted using the DNeasy Blood &  
137 Tissue kit (Qiagen, Hilden, Germany) and individually tagged 100bp TruSeq DNA PCR-free  
138 libraries (Illumina) were prepared according to manufacturer's instructions. Whole-genome  
139 resequencing was performed on multiplexed libraries with Illumina HiSeq 2500 high-throughput  
140 paired-end sequencing technologies at the Lausanne Genomic Technologies Facility (GTF,  
141 University of Lausanne, Switzerland).

142 The bioinformatics pipeline used to obtain analysis-ready SNPs from the 40 individuals plus the  
143 outgroup was the same as in (Machado et al. 2021), adapted from the Genome Analysis Toolkit  
144 (GATK) Best Practices (van der Auwera et al. 2013) to a non-model organism following the  
145 developers' recommendations. Briefly, reads were trimmed with Trimomatic v.0.36 (Bolger et  
146 al. 2014) and aligned with BWA-MEM v.0.7.15 (Li and Durbin 2009) to the barn owl reference  
147 genome (GenBank accession JAEUGV000000000; Machado et al. 2021). Base quality score  
148 recalibration (BQSR) was performed in GATK v.4.1.3 using high-confidence calls obtained from  
149 two independent callers: GATK's HaplotypeCaller and GenotypeGVCF v.4.1.3 and ANGSD v.0.921  
150 (Korneliussen et al. 2014). Following BQSR, variants were called with GATK's HaplotypeCaller  
151 and GenotypeGVCFs v.4.1.3 from the recalibrated bam files. Genotype calls were filtered using  
152 GATK and VCFtools (Danecek et al. 2011) if they presented: low individual quality per depth (QD  
153 < 5), extreme coverage (600 > DP > 1000), mapping quality (MQ < 40 and MQ > 70), extreme

154 hetero or homozygosity ( $\text{ExcessHet} > 20$  and  $\text{InbreedingCoeff} > 0.9$ ) and high read strand bias  
155 ( $\text{FS} > 60$  and  $\text{SOR} > 3$ ). We filtered further at the level of individual genotype for low quality ( $\text{GQ}$   
156  $< 20$ ) and extreme coverage ( $\text{GenDP} < 10$  and  $\text{GenDP} > 40$ ). Lastly, we kept only bi-allelic sites  
157 with less than 5% of missing data across individuals resulting in 7'283'516 SNP. For analyses of  
158 neutral population structure and demography, an exact Hardy-Weinberg test was used to  
159 remove sites that significantly departed ( $p < 0.05$ ) from the expected equilibrium using the R (R  
160 Development Core Team 2016) package `HardyWeinberg` (Graffelman and Morales-Camarena  
161 2008; Graffelman 2015) yielding 6'827'220 SNP with a mean coverage of 19.9X (4.6 SD).

162

### 163 **Population structure and genetic diversity**

164 To investigate population structure among our samples, `sNMF v.1.2` (Frichot et al. 2014) was run  
165 for  $K$  2 to 5 in 25 replicates to infer individual clustering and admixture proportions. For this  
166 analysis, singletons were excluded and the remaining SNPs were pruned for linkage  
167 disequilibrium in `PLINK v1.946` (Purcell et al., 2007; parameters `-indep-pairwise 50 10 0.1`) as  
168 recommended by the authors, retaining 288'775 SNP. The same dataset was used to perform a  
169 Principal Component Analysis (PCA) with the R package `SNPRelate` (Zheng et al. 2012). A  
170 second PCA was performed by merging the data in this study with that of (Cumer et al. 2021)  
171 that includes European populations (total of 2'036'320 SNP with no missing data) to assess  
172 where the Eastern Canary population (unsampled in Cumer et al. 2021) falls among the larger  
173 sampling.

174 Individual observed heterozygosity and population-specific private alleles were estimated using  
175 custom R scripts for each population. Individual-based relatedness ( $\beta$ ; (Weir and Goudet 2017;  
176 Goudet et al. 2018), inbreeding coefficients for whole genome SNP data ( $F_{IS}$  and  $F_{IT}$ ), overall,  
177 population specific and pairwise  $F_{ST}$  (Weir and Goudet 2017) were calculated with `hierfstat v.0.5-`  
178 `9` (Goudet 2005).

179



## 180 **Demographic history**

181 To investigate the demographic history of the insular populations and potential admixture  
182 events we used Treemix (Pickrell and Pritchard 2012). Using the LD-pruned dataset filtered  
183 further to include no missing data (228'980 SNP), Treemix was run for 10 replicates with 0 to 5  
184 migration events, rooting the tree on the IS population, given its position on the PCA and what is  
185 known of the region from previous work (Cumer et al. 2021). The function `get_f` was used to  
186 estimate the variance explained by adding migration events.

187

## 188 **Detection of genomic regions under selection**

### 189 *Insular vs mainland barn owls*

190 In this study, we aimed to identify genomic regions potentially under selection at two different  
191 levels. First, to detect signatures of selection specific to barn owls of the Canary Islands, we  
192 grouped insular individuals (EC and WC) and compared them to the mainland ones (MA, PT and  
193 IS). A script by Simon Martin  
194 ([https://github.com/simonhmartin/genomics\\_general/blob/master/popgenWindows.py](https://github.com/simonhmartin/genomics_general/blob/master/popgenWindows.py)) was  
195 used to estimate genome wide patterns of relative ( $F_{ST}^{LvsML}$ ) and absolute ( $d_{xy}$ ) divergence  
196 between the insular and mainland groups, and to calculate nucleotide diversity ( $\pi$ ) per group, in  
197 windows of 100kbp with 20kbp steps.

198 **SNPrelate** was used to calculate a pairwise matrix of linkage disequilibrium ( $r$ ) from SNPs with  
199 over 5% minor allelic frequency (MAF) over all insular individuals (EC and WC) on one hand and  
200 all mainland individuals (PT, MA and IS) in the other, which was then squared to obtain  $r^2$ . For  
201 plotting, we estimated the mean of non-overlapping 100 SNP windows.

202 The topology weighting method implemented in **Twisst** (Martin and Van Belleghem 2017), was  
203 used to quantify the relationships between the five populations in our dataset and visualize how  
204 they change along the genome. **Twisst** estimated the topology based on trees produced using  
205 **Randomized Axelerated Maximum Likelihood (RAxML) v8.2.12** (Stamatakis 2014). **RAxML**

206 inferred trees in sliding windows (100kb of length, 20kb of slide) using a generalized time-  
207 reversible (GTR) CAT model with Lewis ascertainment bias correction. Twisst then estimated the  
208 weighting of each taxon topology (defined as the fraction of all unique population sub-trees) per  
209 window.

210 Finally, we calculated population specific  $F_{ST}$  from allele sharing matrices ( $\beta$ ; (Weir and Goudet  
211 2017; Goudet et al. 2018) in sliding windows of 100kbp with 20kbp steps, using hierfstat. For  
212 each matrix, we calculated i) the mean allele sharing for pairs of individuals from islands and ii)  
213 the mean allele sharing for pairs of individuals, one from an island and the other from the  
214 mainland, from which we obtain the islands specific  $F_{ST}$ . We shall refer to this estimate as  $F_{ST}$   
215 island-specific ( $F_{ST}^{can}$ ; see Sup. Fig. 1 for a schematic representation). This method allowed us to  
216 identify genomic regions of high differentiation exclusively on the islands with no confounding  
217 effect from the mainland (see also Weir et al. 2005).

218 From the genome wide scans, we identified peaks of differentiation with at least two  
219 overlapping windows of  $F_{ST}^{can}$  higher than 5 standard deviations (SD) from the mean (threshold:  
220 0.377), and extracted the genes in these regions from the NCBI's annotation of the reference  
221 genome (RefSeq accession: GCF\_018691265.1). The gene list was then fed to ShinyGO v0.61  
222 (Ge et al. 2020) to investigate potential enrichment of molecular pathways.

223

#### 224 *Eastern vs Western Canary Islands*

225 On a second stage, to investigate potential genomic signals of differentiation, putatively linked  
226 with ecological adaptation to their distinct niches, we contrasted the two insular lineages (EC  
227 against WC). We estimated pairwise  $F_{ST}$ ,  $d_{xy}$  and  $\pi$  as for the island-mainland comparison  
228 described above.

229 Then, as for the island-mainland comparison above, we used hierfstat to calculate population  
230 specific  $F_{ST}$  in sliding windows of 100kbp with 20kbp steps based on a dataset including only  
231 the insular individuals. For each island, we consequently identified genomic regions with at least

232 two overlapping windows of pairwise  $F_{ST}$  higher than 5 SD from the mean (regions highly  
233 differentiated between islands, threshold: 0.157) and above the 99<sup>th</sup> quantile of each  
234 population's  $F$  (regions highly similar within each island, respective threshold for  $F_{ST}^{EC}$ = 0.404  
235 and for  $F_{ST}^{WC}$ =0.393) and extracted the genes in these regions as described above. This yielded  
236 two genes lists, one per island, which were input to ShinyGO as above.

237

### 238 **Climatic niche analysis**

239 To assess whether the barn owl populations of eastern and western Canaries occupy different  
240 climatic niches, we used the Outlying Mean Index (OMI) approach (Dolédec et al. 2000) as  
241 implemented in the R package *ade4* v.1.7-16. Observation points for barn owls were compiled  
242 from three different sources: Global Biodiversity Information Facility (GBIF), samples sequenced  
243 in this study and in Burri et al. (2016). We kept records only from the islands sampled in this  
244 study, namely Tenerife (*T. alba*; N=79) and Lanzarote and Fuerteventura (*T. a. gracillirostris*;  
245 N=34 and N=39, respectively).

246 Climatic variables for the Canary Islands were extracted from the WorldClim database (Hijmans  
247 et al. 2005) at 30 sec resolution (approximately 1 km<sup>2</sup>) using the R package *rbioclim* (Exposito-  
248 Alonso 2017). Redundant variables (correlation of 1) were trimmed and the final model was run  
249 with the following 13 variables: Mean Diurnal Range (BIO2), Isothermality (BIO3), Temperature  
250 Seasonality (BIO4), Max Temperature of Warmest Month (BIO5), Min Temperature of Coldest  
251 Month (BIO6), Temperature Annual Range (BIO7), Mean Temperature of Driest Quarter (BIO9),  
252 Annual Precipitation (BIO12), Precipitation of Driest Month (BIO14), Precipitation Seasonality  
253 (BIO15), Precipitation of Warmest Quarter (BIO18), Precipitation of Coldest Quarter (BIO19).

254

## 255 Results

### 256 Population structure and genetic diversity

257 The overall  $F_{ST}$  in our dataset was 0.0698. Individual ancestry analyses with sNMF distinguished  
258 four genetic clusters, separating each population into its own cluster, except Morocco (MA) and  
259 Portugal (PT) that clustered together (Fig. 1a). Similarly, PCA clustering clearly grouped  
260 individuals according to their population, except PT and MA (Fig. 1c). The first axis opposed the  
261 insular populations to the mainland, as did sNMF  $K=2$  (Sup. Fig. 2), with Eastern Canary (EC) and  
262 Israel (IS) at each extreme. The second axis contrasted the two insular populations EC and  
263 Western Canary (WC), as in  $K=3$  (Sup. Fig. 2), and finally the third axis segregated the mainland  
264 groups with PT and MA opposed to IS, as in  $K=4$  (Fig. 1a, 1c). Three individuals from EC (one  
265 from Fuerteventura and two from Lanzarote) showed small ancestry levels from both WC and PT  
266 in sNMF and were placed intermediately on axes 1 and 2 of the PCA. In the PCA including the  
267 European individuals, the first axis remained qualitatively the same with EC and WC together in  
268 opposition to IS (Sup. Fig. 3). Axes 2 and 3 switched positions, with MA, PT and the rest of  
269 Europe being first isolated from the rest and only then the two Canary split from each other  
270 (Sup. Fig. 3). In terms of differentiation, pairwise  $F_{ST}$  were highest between both islands and IS  
271 (EC-IS 0.092; WC-IS 0.088) as well as between islands (WC-EC 0.084). The mainland  
272 populations were overall less differentiated (all below 0.04), with PT and MA having the lowest  
273  $F_{ST}$  with all other populations in accordance with their central position on the PCA (all below  
274 0.06 for PT and 0.061 for MA), and the lowest between themselves (0.007) (Table 1).

275 Treemix yielded a population tree highly resembling the first PCA axis, with two main branches  
276 splitting from the IS root, one towards PT and MA and the second to WC and EC (Sup. Fig. 4).  
277 Most of the variance was explained by the tree with no migration (0.993). Nonetheless, the tree  
278 with two migration events displayed the highest likelihood (162.284), with one migration edge  
279 from the base of WC towards the tip of PT (edge weight 0.33) and the other from the base of PT

280 towards the tip of EC (edge weight 0.13). Adding more than two migration events to the tree did  
281 not improve its fit to the data.

282 Overall, mainland populations presented higher genetic diversity than the insular ones (Table 1).  
283 Nonetheless, both insular populations showed over 280'000 private polymorphic sites (Table 1).  
284 Accordingly, individual relatedness was higher within and between insular populations (Sup. Fig.  
285 5), and PT had the lowest within population relatedness. All populations showed signs of  
286 random mating with  $F_{IS}$  close to zero but slightly negative as expected of dioecious species  
287 (Balloux 2004), while the inbreeding levels of insular barn owls relative to the whole set of  
288 populations ( $F_{IT}$ ) were higher than those on the mainland (Table 1), a reflection of their isolation  
289 from the continent.

290

#### 291 **Island vs mainland genomic comparisons**

292 In order to measure the differentiation between islands and mainland individuals, we computed  
293 two distinct  $F_{ST}$  along the genome (see methods for details).  $F_{ST}^{Can}$  allowed the detection of  
294 regions of high similarity in the islands as a whole, whereas  $F_{ST}^{LvsML}$  produced less clear results  
295 with population-specific allelic frequencies driving the overall signal instead of the defined  
296 groups. For example,  $F_{ST}^{LvsML}$  yielded a peak of differentiation between the islands and the  
297 mainland which, upon closer inspection of pairwise comparisons of the populations, turned out  
298 to be due to differences between EC and the mainland only, whereas WC did not produce the  
299 same signal (Sup. Fig. 6). The genomic comparisons of diversity and divergence between insular  
300 and mainland barn owls based on the  $F_{ST}^{Can}$  yielded 48 regions (478 100kb overlapping  
301 windows) of high differentiation including 100 genes (Fig. 2a). ShinyGO analyses identified an  
302 enrichment of five functional categories related to morphogenesis in humans (Sup. Table 2). The  
303 largest enriched pathway – anatomical structure morphogenesis – included 25 of the genes in  
304 regions of high genomic differentiation. The remaining three categories – anatomical structure  
305 formation involved in morphogenesis, tube morphogenesis and blood vessel morphogenesis –  
306 were subsets of the largest pathway, including 15, 14, 12 and 10 of the 25 genes, respectively.

307 The largest of the peaks encompassed 15Mb of Super-Scaffold\_1000006. Of all the genes  
308 found in peaks of differentiation, 87 out of 100 were within this region. Here, insular owls  
309 showed a strong decrease in relative diversity compared to the mainland ( $F_{ST}^{Can}$ ), as well as a  
310 drop of absolute divergence ( $d_{xy}$ ) between each other and nucleotide diversity ( $\pi$ ). The region  
311 showed strong LD ( $r^2$ ) in all insular owls between neighbouring variants compared to the rest of  
312 the scaffold (Fig. 2b), which was not the case among continental ones (Sup. Fig. 7). In addition,  
313  $F_{ST}$  was higher between island and mainland owls (Sup Fig. 6). Twisst showed roughly similar  
314 proportions of each tree along the genome, except for this region where there was a higher than  
315 average proportion of trees that joined EC and WC (Sup. Fig. 8). Of the 25 genes of the  
316 morphogenesis pathway, 18 were found in this closely-linked region of  
317 Super\_Scaffold\_1000006 (21% of the total 87 genes of the region).

318

### 319 **Eastern vs Western Canary Islands**

#### 320 *Climatic niche analysis*

321 To investigate the genomic and ecological differentiation between island populations (EC and  
322 WC), we first depict different climate in the two set of islands based on barn owl observations in  
323 the Canary Islands. The climatic niche analyses (OMI) yielded two axes that explained the  
324 climatic variability in our study area (Fig. 3b), with the first axis (OMI1) explaining nearly all of it  
325 (99.3%). OMI1 was positively correlated with temperature and negatively correlated with  
326 precipitation (Sup. Fig. 10). The eastern population *T. a. gracilirostris* occupied a narrow niche of  
327 high temperature, low precipitation and low seasonal and daily variability. *T. alba* in Tenerife  
328 occupied a broader niche that covered most of OMI1, including some of the niche of *T. a.*  
329 *gracilirostris*. OMI2 explained little of the variability (0.7%), spreading slightly each population's  
330 niche without segregating them.

331

#### 332 *Detection of differentially selected genomic regions*

333 We then searched for regions under selection in each island, yielding to a total of 33 putatively  
334 adaptive regions (14 in EC and 19 in WC), with high differentiation ( $F_{ST}$ ) between island and  
335 increased relatedness within each island ( $F_{ST}^{EC}$  and  $F_{ST}^{WC}$ ), from which we obtained two lists of  
336 genes (Fig. 3c, 3d). For EC, there were 30 such genes (Sup. Table 3) while for WC there were 25  
337 genes (Sup. Table 4). Enrichment analyses found no link to a specific GO pathway for either  
338 island population. Nonetheless, in each island there were clusters of genes with similar  
339 identified functions, namely body proportions and blood pressure in EC, and cellular response to  
340 hypoxia in WC.

## 341 **Discussion**

342 Islands offer unique conditions for organisms to adapt and expand their niches. In the Canaries,  
343 an archipelago rich in endemics, the barn owl is one of the few raptors present and is thought to  
344 have diverged into a subspecies on the easternmost islands. Taking advantage of whole-  
345 genome sequences, we first investigate the origin of the population of barn owls in the Canary  
346 Islands, revealing that the latter are long-standing populations and allowing us to address their  
347 taxonomic classification. Using a new, more sensitive method based on excess of allele sharing  
348 within the islands, we detect 58 putatively locally adapted genomic segments, many of them  
349 grouped in a haplotype-like region seemingly under positive selection in the Canary Islands. A  
350 quarter of the tightly linked genes in this genomic region are enriched for genes contributing to  
351 a pathway of anatomical morphogenesis suggesting morphological adaptations to insularity. We  
352 also identify scattered genomic regions putatively locally adapted to either the eastern and  
353 western islands. For eastern Canaries, the identified genes in regions under positive selection  
354 belong to pathways linked to body proportions and blood pressure, consistent with the smaller  
355 owl size of this population living in a hot arid climate. In the western Canaries, barn owls from  
356 Tenerife display a potential signal of selection of genes related to hypoxia, a potential response  
357 to inhabiting an island with a steep elevation gradient.

358

### 359 **Barn owls from the Canary Islands and Mediterranean Basin**

360 Our work shows that, while each population in the study area has its own unique genetic  
361 composition (Fig. 1), barn owls from the Canary Islands are distinct from those on the mainland  
362 surrounding the Mediterranean Basin. Indeed, clustering methods constantly opposed insular  
363 individuals to mainland ones (Fig. 1c; Sup. Fig. 2) and were supported by the drift-based trees of  
364 Treemix. Thus, overall, our current results indicate that the two insular lineages – Eastern and  
365 Western Canaries – have a common origin.



366 In terms of genetic diversity, the islands were less diverse than the mainland as expected and  
367 showed slightly higher levels of inbreeding relative to the whole set (Frankham 1997). However,  
368 they presented nearly 10-fold higher levels of private alleles than those reported for other  
369 islands in the Atlantic (British Isles; Machado et al. 2021) and in the Mediterranean Sea (Cyprus  
370 and Greek islands; Machado et al. 2021). Notably, the two Canaries insular populations, about  
371 165 Km apart, were more distant genetically from each other than either was from Portugal,  
372 over 1000 Km away. Furthermore, they were more distant from each other even than WC was  
373 from any population in continental Europe in a recent genomic study (Cumer et al. 2021), as  
374 well as in an earlier one with microsatellites (Burri et al. 2016). The high private diversity could  
375 be partially explained by the small number of samples in north-western Africa, which may be  
376 masking any shared polymorphisms between the islands and the nearest mainland as private to  
377 the former. However, as we did sample PT and IS, the most diverse populations in the Western  
378 Palearctic assumed to meet in northern Africa (Cumer et al. 2021), much of this insular diversity  
379 is likely indeed private. Therefore, the Canaries appear to have been colonized much earlier than  
380 the other studied insular populations and have thus had the time for *in situ* mutations to  
381 accumulate in spite of genetic drift, which is supported by their higher divergence as well. These  
382 populations may also reflect a more ancient lineage from northern Africa that would have been  
383 replaced or simply evolved in a different direction and only the addition of samples from African  
384 mainland (on top of the three MA samples) would allow to fully depict the neutral history of  
385 these populations.

386

### 387 **Insularity**

388 We found multiple evidence of adaptation common to both barn owl lineages of the Canary  
389 Islands. To do so, we used an estimator of population specific  $F_{ST}$  (Weir and Goudet 2017;  
390 Goudet et al. 2018) to identify genomic regions with an excess of shared ancestry in all insular  
391 individuals relatively to the mean shared ancestry between islands and mainland individuals.  
392 Being a moment estimator, it can process efficiently a large amount of genomic loci, compared

393 to maximum likelihood or Bayesian estimators (e.g. Foll and Gaggiotti 2008). More importantly,  
394 it does not rely on the F-model, which assumes independent populations. This island specific  $F_{ST}$   
395 ( $F_{ST}^{Can}$ ) identified regions of increased relatedness between insular individuals compared to the  
396 averaged relatedness along the genome (i.e. regions in which all insular individuals resemble  
397 each other more than expected). This population specific, moment based and model-free  
398 estimator of  $F_{ST}$  provides a clearer result than classical pairwise  $F_{ST}$  scan, as it focuses on the  
399 diversity in the target population rather than taking an average over the set of populations, and  
400 should be a useful addition to the population genomic toolbox to detect nested signals of local  
401 adaptation, especially when there is substructure in the groups one wishes to compare. We thus  
402 considered regions highly similar in insular individuals as putatively under selection on the  
403 islands. The genomic landscape of  $F_{ST}^{Can}$  differentiation between insular and mainland owls  
404 yielded 58 windows putatively under selection (Fig. 2a). Among these, a particularly large and  
405 clear peak of differentiation stood out. This region approximately 15 Mb in length was highly  
406 similar among insular individuals (Sup. Fig. 9) as shown by the accompanying drop in  $d_{XY}$  and  $\pi$   
407 (Fig. 2b). Furthermore, the increased linkage between alleles in this region suggests that it is  
408 transmitted in a haplotype-fashion. Crucially, the fact that we do not see the slightest surge of  
409 LD in mainland individuals confirms that it is not a by-product of a region of low-recombination  
410 in this species (Sup. Fig. 7). Overall, we provide strong evidence of positive selection in this  
411 genomic region in Canary Islands owls, suggesting an adaptation to insularity (Fig. 2).

412 A fifth of the genes in this haplotype (18 out of 87), in conjunction with 7 other genes in  
413 potentially adaptative regions, significantly enriched the anatomical structure morphogenesis  
414 pathway (Sup. Table 2), a biological process related to the organisation and generation of  
415 anatomical structure during development. This suggests positive selection on some  
416 morphological trait on insular individuals. Given that there is evidence of gene flow from the  
417 mainland into both islands (see admixed individuals in Fig. 1, Sup Fig, S2), we propose two  
418 hypotheses to explain how selection might act on this haplotype. First, it could confer a  
419 significant advantage to individuals carrying it on the island and prevent those that do not carry  
420 it from reproducing or surviving. In this scenario, immigrants from the mainland not carrying this

421 haplotype would reproduce less in both islands. In the second scenario, selection would happen  
422 on the migrants themselves before reaching the island if, for example, the haplotype facilitates  
423 long flight over large spans of water. It is widely accepted that, given how dispersal capacity is  
424 highly variable across species, even among birds, some are more prone to colonizing islands  
425 than others. Therefore, it is also conceivable that, within a species or population, some  
426 individuals are morphologically more predisposed or have better dispersal abilities than others.  
427 Since the barn owl generally avoids flying over open water, as demonstrated by its consistently  
428 higher differentiation on islands (Cumer et al. 2021; Machado et al. 2021, n.d.), this seems  
429 plausible. The absence of phenotypic measurements from the sequenced birds prevents us from  
430 establishing a link between phenotypes and genotypes on this data set, and we hence remain  
431 cautious on the speculation regarding the functional implications of this haplotype. Future work  
432 should verify the frequencies of this haplotype in a larger cohort as we only had 19 insular  
433 individuals in this study and, if possible, include detailed morphometric measurements to allow  
434 a GWAS-like approach.

435

#### 436 **Ecological divergence**

437 In the Canary archipelago, both the eastern islands and Tenerife have many specific endemic  
438 species across multiple taxa. This is generally attributed to their intrinsic characteristics driving  
439 ecological speciation, namely the arid and windy conditions of Lanzarote and Fuerteventura, and  
440 the elevation gradient of the Teide volcano (up to 3'718m a.s.l.) in Tenerife. We quantified the  
441 climatic differences between the two environments with a niche analysis based on reported  
442 barn owl observations, and show that indeed barn owls occupy significantly different niches on  
443 each group of islands (Fig. 3b). In the east, they are found on unvaryingly hot and dry locations,  
444 whereas Tenerife covers a wide range of temperature and precipitation (Fig. 3b).

445 From the genomic data, we found evidence of local adaptation on both insular populations (Fig.  
446 3c, 3d). The eastern population had more genomic regions, and more genes, potentially under  
447 selection compared to the west (30 and 25 genes, respectively). Although no significant

448 pathway enrichment was detected in either population, there were clear groups of genes with  
449 similar known functions in the putatively adapted regions. In the eastern population there were  
450 two such groups. The first, composed of 7 genes, has significant links to body size and  
451 proportions in humans (see Sup. Table 3 and references therein). Among these, a specific set of  
452 4 genes – *HIP1R*, *CCDC62*, *VPS37B* and *ABCB9* – is tightly clustered in the barn owl genome  
453 (Fig. 3c). These four genes have been linked to body height, body-mass-index and other body  
454 measurement ratios (Turcot et al. 2018; Kichaev et al. 2019; Vuckovic et al. 2020; Zhu et al.  
455 2020), and may thus play a role in the smaller size of barn owls in the eastern population, which  
456 would then be adaptive. The second group of genes in regions potentially under selection,  
457 includes 11 genes related to numerous blood parameters (Sup. Table 3), a similar signal to that  
458 seen in chickens adapted to hot arid environments (Gu et al. 2020). In particular, the gene  
459 *MTHFR* has extensive connections to blood pressure (Newton-Cheh et al. 2009; Ehret et al.  
460 2016; Liu et al. 2016; Surendran et al. 2016; Hoffmann et al. 2017; Wain et al. 2017; Kulminski  
461 et al. 2018; German et al. 2020), a trait known to vary with environmental temperature in  
462 mammals (Halonen et al. 2011) and birds (Darre and Harrison 1987), potentially suggesting  
463 barn owls have circulatory systems adapted to the hot and dry conditions of the eastern  
464 Canaries.

465 In the western island population, regions putatively under selection contained an interesting  
466 group of 4 genes - *EPAS1*, *PRKCE*, *MCFD2* and *FZD8* - with links to red blood cells, haemoglobin  
467 density and cellular response to hypoxia (i.e. low levels of oxygen; Sup. Table 4; Astle et al.  
468 2016; Kichaev et al. 2019; Chen et al. 2020; Oskarsson et al. 2020; Vuckovic et al. 2020). Red  
469 blood cells, and the haemoglobin within, are responsible for transporting oxygen in the body and  
470 are direct targets of selection at high elevation (O'Brien et al. 2020). The gene *EPAS1* in  
471 particular, is well known for being involved in adaptation to high altitude environments across  
472 vertebrates (Witt and Huerta-Sánchez 2019). These genes hints at a possible adaptation of barn  
473 owls to higher altitude in Tenerife. On this small island, barn owls are mostly concentrated at  
474 lower altitude (i.e. along the coast – 0 to 300m a.s.l.) and their repartition is limited in the  
475 central part of the island by the presence of the colossal peak of Teide volcano (3715m a.s.l.;

476 Silverio 1998). This is consistent with the known limited ability of this bird to live at high  
477 altitudes (Machado et al. 2018; Cumer et al. 2021). However, the observation of individuals up to  
478 1200m a.s.l. and the presence of breeding couples at moderate altitudes (600 to 1200m a.s.l.)  
479 (Silverio 1998), support the hypothesis of an ongoing adaptation to higher altitude in this insular  
480 population. This hypothesis, which deserves further investigations, is also consistent with  
481 observations made in other populations in warm climates; where local barn owl populations  
482 expand their range by adapting to slightly higher altitudes (Romano et al. 2020).

483 Considering its wide distribution, even accounting for phenotypic plasticity, barn owls' capacity  
484 to adapt to a variety of prey and environments is unquestionable. As such, detecting signals of  
485 local adaption in the Canary Islands is not surprising. Indeed, with islands generally being  
486 species-poor, the species that do inhabit them have to adapt to different or broader niches via  
487 ecological divergence (Losos and Ricklefs 2009). This is especially true of volcanic islands that  
488 arise isolated and uninhabited, in contrast to those intermittently connected to the mainland  
489 and more easily colonized. Moreover, the community of birds of prey in the Canary archipelago  
490 includes less than half the species found in the nearby mainland (8 diurnal and 2 nocturnal  
491 species; Martín and Lorenzo, 2001; rodriguez et al. 2018), likely due to the lack of suitable  
492 habitat, preys and/or the limited surface. A by-product of this is the reduction of inter-specific  
493 competition, which could have allowed the barn owl to maintain population sizes just large  
494 enough on the islands through time for selection to act and potentially expand its niche to better  
495 exploit the insular environment. Our results suggest this is happening in parallel on each island  
496 (Fig. 3c, 3d), consistent with their different niches (Fig. 3b) and relative genetic isolation,  
497 producing two distinct ecomorphs, adapted to distinct ecosystems.

498

#### 499 **Insular subspecies**

500 The eastern islands of Lanzarote and Fuerteventura, and adjacent islets (Fig. 3a) are home to  
501 the barn owl subspecies *T. a. gracilirostris*. This classification is based on its smaller size and  
502 even on colouration pattern, although the latter is contested by ornithologists and inconsistent

503 with reported phenotypical measurements (Burri et al. 2016). The reduction in size is actually a  
504 common pattern in insular barn owls (Romano et al. 2021), and could be an adaptation to  
505 nesting in very small cavities (i.e. cracks in lava walls) and/or to better navigate the strong  
506 winds in the eastern islands (Siverio 2007). The genomic data presented here is consistent with  
507 this population forming an endemic subspecies. It has diverged considerably from the mainland,  
508 with higher differentiation levels than barn owls from any other studied island in the Western  
509 Palearctic (Machado et al. 2021, n.d.). Moreover, we show it carries high levels of private genetic  
510 diversity and multiple genomic regions showing signs of local adaptation (Fig. 3c).

511 In contrast, barn owls from Tenerife and the remaining islands are considered to belong to the  
512 nominal *T. alba* found also on the mainland surrounding the Mediterranean Basin (Fig. 3a).  
513 However, it too has considerably diverged from the mainland and shows signs of potential  
514 ongoing adaptation in Tenerife and its elevation gradient (see previous section). Furthermore, it  
515 clusters with the other insular Canary population rather than the mainland (Fig. 1). While it is  
516 not the aim of this study to evaluate what constitutes a subspecies, we provide evidence that  
517 the Tenerife population is diverging significantly from its founding population, both neutrally and  
518 adaptively, albeit at a slower pace than the eastern population.

519 The reasons why the eastern population is more divergent than the western, a puzzling fact  
520 considering it is closer to the mainland, are not yet fully resolved. Neutral divergence in  $F_{ST}$   
521 between these two insular populations suggest they are the result of two independent  
522 colonisation events rather than a strict east-to-west progression as described for other taxa  
523 (Juan et al. 2000). Although the islands themselves emerged from east to west, Tenerife is at  
524 least 11 million years old, twice the inferred time of formation of the *T. alba* species (Uva et al.  
525 2018) and thus available for colonisation at the time. Nonetheless, an earlier settlement of the  
526 eastern islands would have given more time for both genetic drift and selection to promote  
527 divergence. Alternatively, a very small population size in the east, consistent with current census  
528 data (Palacios 2004, Silverio 2007), could account for the stronger drift in a scenario of  
529 simultaneous colonization. However, it would strongly hinder local adaptation, making it a less

530 likely hypothesis since we identified more regions putatively under selection in this population.  
531 Further work, including an extensive sampling of all island populations, as well as demographic  
532 modelling, would be needed to resolve this intriguing pattern and refine the history of the barn  
533 owl in the Canary archipelago.

534

## 535 **Conclusion**

536 Due to their intrinsic characteristics, islands house numerous endemics making them ideal  
537 systems to study the bases of ecological divergence. We provide empirical evidence that both  
538 neutral and adaptive evolutionary mechanisms shaped divergence from the mainland in barn  
539 owls from the Canary archipelago. Our results show clear signs of genome-wide differentiation  
540 (i.e. neutral), a combination of mutations (high private diversity; Table 1) and drift (high  $F_{ST}$  and  
541  $F_{IT}$ ), consistent with theoretical expectations for populations established and isolated long ago  
542 despite some admixture. We also identify signals of local adaptation to common insular  
543 conditions (Fig. 2), as well as to each island's niche, creating ecomorphs (Fig. 3). While the  
544 history and functional effect of the putatively adapted genomic regions identified here deserve  
545 further investigation, these observations highlight how selection can still act on small isolated  
546 populations. This study illustrates the capacity of a widespread bird to adapt to the local  
547 ecological conditions of small islands, an adaptative capacity which may prove essential in  
548 facing a changing global climate.

549

## 550 **Acknowledgements**

551 We are grateful to the following institutions and individuals that provided samples or aided in  
552 sampling to our study: Karim Rousselon, Gustavo Tejera, Sylvain Antoniazza, Reto Burri, Aurelio  
553 Martín, David P. Padilla, the "Association Marocaine pour la Protection des Rapaces AMPR" and  
554 the Natural History Museum of Tenerife and the Wildlife Rehabilitation Centre La Tahonilla  
555 (Cabildo Insular de Tenerife). We thank Céline Simon and Guillaume Dumont for their valuable  
556 assistance with molecular work. The Gobierno de Canarias provided all the corresponding  
557 permits for the collection and inter-island transport of samples. This study was funded by the  
558 Swiss National Science Foundation with grants 31003A-138180 & 31003A\_179358 to JG and  
559 31003A\_173178 to AR.

560

## 561 **Data Accessibility**

562 The raw Illumina reads for the whole-genome sequenced individuals are available in BioProjects  
563 PRJNA700797, PRJNA727977 and PRJNA774943. Sampling locations used for niche  
564 modelling are given in appendix 1.

565

## 566 **Author Contributions**

567 APM, TC, AR, JG designed this study; FS, MC, IR, RL provided samples; APM produced whole-  
568 genome resequencing libraries; TC and APM conducted the analyses; APM and TC led the  
569 writing of the manuscript with input from all authors.

570

571



## 572 **References**

- 573 Anguita, F., and F. Hernán. 2000. The Canary Islands origin: A unifying model. *J. Volcanol.*  
574 *Geotherm. Res.* 103:1–26. Elsevier B.V.
- 575 Astle, W. J., H. Elding, T. Jiang, D. Allen, D. Ruklisa, A. L. Mann, D. Mead, H. Bouman, F. Riveros-  
576 Mckay, M. A. Kostadima, J. J. Lambourne, S. Sivapalaratnam, K. Downes, K. Kundu, L.  
577 Bomba, K. Berentsen, J. R. Bradley, L. C. Daugherty, O. Delaneau, K. Freson, S. F. Garner, L.  
578 Grassi, J. Guerrero, M. Haimel, E. M. Janssen-Megens, A. Kaan, M. Kamat, B. Kim, A.  
579 Mandoli, J. Marchini, J. H. A. Martens, S. Meacham, K. Megy, J. O’Connell, R. Petersen, N.  
580 Sharifi, S. M. Sheard, J. R. Staley, S. Tuna, M. van der Ent, K. Walter, S. Y. Wang, E. Wheeler,  
581 S. P. Wilder, V. Iotchkova, C. Moore, J. Sambrook, H. G. Stunnenberg, E. Di Angelantonio, S.  
582 Kaptoge, T. W. Kuijpers, E. Carrillo-de-Santa-Pau, D. Juan, D. Rico, A. Valencia, L. Chen, B.  
583 Ge, L. Vasquez, T. Kwan, D. Garrido-Martín, S. Watt, Y. Yang, R. Guigo, S. Beck, D. S. Paul, T.  
584 Pastinen, D. Bujold, G. Bourque, M. Frontini, J. Danesh, D. J. Roberts, W. H. Ouwehand, A. S.  
585 Butterworth, and N. Soranzo. 2016. The Allelic Landscape of Human Blood Cell Trait  
586 Variation and Links to Common Complex Disease. *Cell* 167:1415-1429.e19. Cell Press.
- 587 Balloux, F. 2004. Heterozygote excess in small populations and the heterozygote-excess  
588 effective population size. *Evolution (N. Y.)* 58:1891–1900. Society for the Study of  
589 Evolution.
- 590 Bannerman, D.A. and Bannerman, W.M., 1963. *Birds of the Atlantic Islands: History of the birds*  
591 *of the Cape Verde Islands (Vol. 4)*. Oliver & Boyd.
- 592 Bolger, A. M., M. Lohse, and B. Usadel. 2014. Trimmomatic: A flexible trimmer for Illumina  
593 sequence data. *Bioinformatics* 30:2114–2120. Oxford University Press.
- 594 Burri, R., S. Antoniazza, A. Gaiher, A.-L. Ducrest, C. Simon, L. Fumagalli, J. Goudet, and A.  
595 Roulin. 2016. The genetic basis of color-related local adaptation in a ring-like colonization  
596 around the Mediterranean. *Evolution (N. Y.)* 70:140–153.
- 597 Carine, M. A., C. J. Humphries, I. R. Guma, J. A. Reyes-Betancort, and A. Santos Guerra. 2009.  
598 Areas and algorithms: Evaluating numerical approaches for the delimitation of areas of  
599 endemism in the Canary Islands archipelago. *J. Biogeogr.* 36:593–611.
- 600 Chen, M. H., L. M. Raffield, A. Mousas, S. Sakaue, J. E. Huffman, A. Moscati, B. Trivedi, T. Jiang, P.  
601 Akbari, D. Vuckovic, E. L. Bao, X. Zhong, R. Manansala, V. Laplante, M. Chen, K. S. Lo, H.  
602 Qian, C. A. Lareau, M. Beaudoin, K. A. Hunt, M. Akiyama, T. M. Bartz, Y. Ben-Shlomo, A.  
603 Beswick, J. Bork-Jensen, E. P. Bottinger, J. A. Brody, F. J. van Rooij, K. Chitrala, K. Cho, H.  
604 Choquet, A. Correa, J. Danesh, E. Di Angelantonio, N. Dimou, J. Ding, P. Elliott, T. Esko, M. K.  
605 Evans, J. S. Floyd, L. Broer, N. Grarup, M. H. Guo, A. Greinacher, J. Haessler, T. Hansen, J. M.  
606 Howson, Q. Q. Huang, W. Huang, E. Jorgenson, T. Kacprowski, M. Kähönen, Y. Kamatani, M.  
607 Kanai, S. Karthikeyan, F. Koskeridis, L. A. Lange, T. Lehtimäki, M. M. Lerch, A. Linneberg, Y.  
608 Liu, L. P. Lyytikäinen, A. Manichaikul, H. C. Martin, K. Matsuda, K. L. Mohlke, N. Mononen, Y.  
609 Murakami, G. N. Nadkarni, M. Nauck, K. Nikus, W. H. Ouwehand, N. Pankratz, O. Pedersen,  
610 M. Preuss, B. M. Psaty, O. T. Raitakari, D. J. Roberts, S. S. Rich, B. A. T. Rodriguez, J. D.  
611 Rosen, J. I. Rotter, P. Schubert, C. N. Spracklen, P. Surendran, H. Tang, J. C. Tardif, R. C.  
612 Trembath, M. Ghanbari, U. Völker, H. Völzke, N. A. Watkins, A. B. Zonderman, P. W. F.  
613 Wilson, Y. Li, A. S. Butterworth, J. F. Gauchat, C. W. K. Chiang, B. Li, R. J. F. Loos, W. J. Astle,  
614 E. Evangelou, D. A. van Heel, V. G. Sankaran, Y. Okada, N. Soranzo, A. D. Johnson, A. P.  
615 Reiner, P. L. Auer, and G. Lettre. 2020. Trans-ethnic and Ancestry-Specific Blood-Cell  
616 Genetics in 746,667 Individuals from 5 Global Populations. *Cell* 182:1198-1213.e14.
- 617 Clements, J. F., T. S. Schulenberg, M. J. Iliff, S. M. Billerman, T. A. Fredericks, B. L. Sullivan, and C.  
618 L. Wood. 2019. *The eBird/Clements Checklist of Birds of the World: v2019*.
- 619 Cumer, T., A. P. Machado, G. Dumont, V. A. Bontzorlos, R. Ceccherelli, M. Charter, K. Dichmann,

- 620 H.-D. Martens, N. Kassinis, R. Lourenço, F. Manzia, K. Ovari, L. Prévost, M. Rakovic, F.  
621 Siverio, A. Roulin, and J. Goudet. 2021. Landscape and climatic variations of the  
622 Quaternary shaped multiple secondary contacts among barn owls (*Tyto alba*) of the  
623 Western Palearctic. *bioRxiv*, doi: 10.1101/2021.06.09.447652.
- 624 Danecek, P., A. Auton, G. Abecasis, C. A. Albers, E. Banks, M. A. DePristo, R. E. Handsaker, G.  
625 Lunter, G. T. Marth, S. T. Sherry, G. McVean, and R. Durbin. 2011. The variant call format  
626 and VCFtools. *Bioinformatics* 27:2156–2158.
- 627 Darre, M. J., and P. C. Harrison. 1987. Heart rate, blood pressure, cardiac output, and total  
628 peripheral resistance of single comb White Leghorn hens during an acute exposure to 35 C  
629 ambient temperature. *Poult. Sci.* 66:541–547.
- 630 Dolédec, S., D. Chessel, and C. Gimaret-Carpentier. 2000. Niche separation in community  
631 analysis: A new method. *Ecology* 81:2914–2927. John Wiley & Sons, Ltd.
- 632 Ducrest, A.-L., S. Neuenschwander, E. Schmid-Siegert, M. Pagni, C. Train, D. Dylus, Y. Nevers, A.  
633 Warwick Vesztrocy, L. M. San-Jose, M. Dupasquier, C. Dessimoz, I. Xenarios, A. Roulin, and  
634 J. Goudet. 2020. New genome assembly of the barn owl (*Tyto alba alba*). *Ecol. Evol.*  
635 10:2284–2298. John Wiley and Sons Ltd.
- 636 Ehret, G. B., T. Ferreira, D. I. Chasman, A. U. Jackson, E. M. Schmidt, T. Johnson, G. Thorleifsson,  
637 J. Luan, L. A. Donnelly, S. Kanoni, A. K. Petersen, V. Pihur, R. J. Strawbridge, D. Shungin, M.  
638 F. Hughes, O. Meirelles, M. Kaakinen, N. Bouatia-Naji, K. Kristiansson, S. Shah, M. E. Kleber,  
639 X. Guo, L. P. Lytykäinen, C. Fava, N. Eriksson, I. M. Nolte, P. K. Magnusson, E. L. Salfati, L.  
640 S. Rallidis, E. Theusch, A. J. P. Smith, L. Folkersen, K. Witkowska, T. H. Pers, R. Joehanes, S.  
641 K. Kim, L. Lataniotis, R. Jansen, A. D. Johnson, H. Warren, Y. J. Kim, W. Zhao, Y. Wu, B. O.  
642 Tayo, M. Bochud, D. Absher, L. S. Adair, N. Amin, D. E. Arking, T. Axelsson, D. Baldassarre,  
643 B. Balkau, S. Bandinelli, M. R. Barnes, I. Barroso, S. Bevan, J. C. Bis, G. Bjornsdottir, M.  
644 Boehnke, E. Boerwinkle, L. L. Bonnycastle, D. I. Boomsma, S. R. Bornstein, M. J. Brown, M.  
645 Burnier, C. P. Cabrera, J. C. Chambers, I. S. Chang, C. Y. Cheng, P. S. Chines, R. H. Chung, F.  
646 S. Collins, J. M. Connell, A. Döring, J. Dallongeville, J. Danesh, U. De Faire, G. Delgado, A. F.  
647 Dominiczak, A. S. F. Doney, F. Drenos, S. Edkins, J. D. Eicher, R. Elosua, S. Enroth, J.  
648 Erdmann, P. Eriksson, T. Esko, E. Evangelou, A. Evans, T. Fall, M. Farrall, J. F. Felix, J.  
649 Ferrières, L. Ferrucci, M. Fornage, T. Forrester, N. Franceschini, O. H. Franco, A. Franco-  
650 Cereceda, R. M. Fraser, S. K. Ganesh, H. Gao, K. Gertow, F. Gianfagna, B. Gigante, F.  
651 Giulianini, A. Goel, A. H. Goodall, M. O. Goodarzi, M. Gorski, J. Gräßler, C. J. Groves, V.  
652 Gudnason, U. Gyllensten, G. Hallmans, A. L. Hartikainen, M. Hassinen, A. S. Havulinna, C.  
653 Hayward, S. Hercberg, K. H. Herzig, A. A. Hicks, A. D. Hingorani, J. N. Hirschhorn, A. Hofman,  
654 J. Holmen, O. L. Holmen, J. J. Hottenga, P. Howard, C. A. Hsiung, S. C. Hunt, M. A. Ikram, T.  
655 Illig, C. Iribarren, R. A. Jensen, M. Kähönen, H. M. Kang, S. Kathiresan, B. J. Keating, K. T.  
656 Khaw, Y. K. Kim, E. Kim, M. Kivimaki, N. Klopp, G. Kolovou, P. Komulainen, J. S. Kooner, G.  
657 Kosova, R. M. Krauss, D. Kuh, Z. Kutalik, J. Kuusisto, K. Kvaløy, T. A. Lakka, N. R. Lee, I. Te  
658 Lee, W. J. Lee, D. Levy, X. Li, K. W. Liang, H. Lin, L. Lin, J. Lindström, S. Lobbens, S.  
659 Männistö, G. Müller, M. Müller-Nurasyid, F. Mach, H. S. Markus, E. Marouli, M. I. McCarthy,  
660 C. A. McKenzie, P. Meneton, C. Menni, A. Metspalu, V. Mijatovic, L. Moilanen, M. E.  
661 Montasser, A. D. Morris, A. C. Morrison, A. Mulas, R. Nagaraja, N. Narisu, K. Nikus, C. J.  
662 O'Donnell, P. F. O'Reilly, K. K. Ong, F. Paccaud, C. D. Palmer, A. Parsa, N. L. Pedersen, B. W.  
663 Penninx, M. Perola, A. Peters, N. Poulter, P. P. Pramstaller, B. M. Psaty, T. Quertermous, D.  
664 C. Rao, A. Rasheed, N. W. Rayner, F. Renström, R. Rettig, K. M. Rice, R. Roberts, L. M. Rose,  
665 J. Rossouw, N. J. Samani, S. Sanna, J. Saramies, H. Schunkert, S. Sebert, W. H. H. Sheu, Y.  
666 A. Shin, X. Sim, J. H. Smit, A. V. Smith, M. X. Sosa, T. D. Spector, A. Stančáková, A. V.  
667 Stanton, K. E. Stirrups, H. M. Stringham, J. Sundstrom, A. J. Swift, A. C. Syvänen, E. S. Tai, T.  
668 Tanaka, K. V. Tarasov, A. Teumer, U. Thorsteinsdottir, M. D. Tobin, E. Tremoli, A. G.  
669 Uitterlinden, M. Uusitupa, A. Vaez, D. Vaidya, C. M. Van Duijn, E. P. A. Van Iperen, R. S.  
670 Vasán, G. C. Verwoert, J. Virtamo, V. Vitart, B. F. Voight, P. Vollenweider, A. Wagner, L. V.  
671 Wain, N. J. Wareham, H. Watkins, A. B. Weder, H. J. Westra, R. Wilks, T. Wilsgaard, J. F.

- 672 Wilson, T. Y. Wong, T. P. Yang, J. Yao, L. Yengo, W. Zhang, J. H. Zhao, X. Zhu, P. Bovet, R. S.  
673 Cooper, K. L. Mohlke, D. Saleheen, J. Y. Lee, P. Elliott, H. J. Gierman, C. J. Willer, L. Franke,  
674 G. K. Hovingh, K. D. Taylor, G. Dedoussis, P. Sever, A. Wong, L. Lind, T. L. Assimes, I.  
675 Njølstad, P. E. H. Schwarz, C. Langenberg, H. Snieder, M. J. Caulfield, O. Melander, M.  
676 Laakso, J. Saltevo, R. Rauramaa, J. Tuomilehto, E. Ingelsson, T. Lehtimäki, K. Hveem, W.  
677 Palmas, W. März, M. Kumari, V. Salomaa, Y. D. I. Chen, J. I. Rotter, P. Froguel, M. R.  
678 Jarvelin, E. G. Lakatta, K. Kuulasmaa, P. W. Franks, A. Hamsten, H. E. Wichmann, C. N. A.  
679 Palmer, K. Stefansson, P. M. Ridker, R. J. F. Loos, A. Chakravarti, P. Deloukas, A. P. Morris,  
680 C. Newton-Cheh, and P. B. Munroe. 2016. The genetics of blood pressure regulation and its  
681 target organs from association studies in 342,415 individuals. *Nat. Genet.* **48**:1171–1184.  
682 Nature Publishing Group.
- 683 Exposito-Alonso, M. 2017. rbioclim: Improved getData function from the raster R package to  
684 interact with past, present and future climate data from worldclim.org.
- 685 Firmat, C., H. gomes Rodrigues, S. Renaud, J. Claude, R. Hutterer, F. Garcia-talavera, and J.  
686 Michaux. 2010. Mandible morphology, dental microwear, and diet of the extinct giant rats  
687 *Canariomys* (Rodentia: Murinae) of the Canary Islands (Spain). *Biol. J. Linn. Soc.* **101**:28–  
688 40. Blackwell Publishing Ltd.
- 689 Foll, M., and O. Gaggiotti. 2008. A genome-scan method to identify selected loci appropriate for  
690 both dominant and codominant markers: A Bayesian perspective. *Genetics* **180**:977–993.  
691 Oxford Academic.
- 692 Frankham, R. 1997. Do island populations have less genetic variation than mainland  
693 populations? *Heredity (Edinb)*. **78**:311–327.
- 694 Frichot, E., F. Mathieu, T. Trouillon, G. Bouchard, and O. François. 2014. Fast and efficient  
695 estimation of individual ancestry coefficients. *Genetics* **196**:973–983.
- 696 Ge, S. X., D. Jung, D. Jung, and R. Yao. 2020. ShinyGO: A graphical gene-set enrichment tool for  
697 animals and plants. *Bioinformatics* **36**:2628–2629. Oxford University Press.
- 698 German, C. A., J. S. Sinsheimer, Y. C. Klimentidis, H. Zhou, and J. J. Zhou. 2020. Ordered  
699 multinomial regression for genetic association analysis of ordinal phenotypes at Biobank  
700 scale. *Genet. Epidemiol.* **44**:248–260. Wiley-Liss Inc.
- 701 Gillespie, R. 2004. Community assembly through adaptive radiation in Hawaiian spiders.  
702 *Science (80- )*. **303**:356–359.
- 703 Gillespie, R., H. Croom, and G. Hastly. 1997. Phylogenetic Relationships and Adaptive Shifts  
704 among Major Clades of Tetragnatha Spiders (Araneae: Tetragnathidae) in Hawai'i. *Pacific*  
705 *Sci.* **51**:380–394.
- 706 González Melián, E. 2018. Sex determination of the Canary Island Chiffchaff *Phylloscopus*  
707 *canariensis* using morphological traits and molecular sexing. *Ornithol Sci* **17**:37–44.
- 708 Goudet, J. 2005. HIERFSTAT, a package for R to compute and test hierarchical F -statistics. *Mol.*  
709 *Ecol. Notes* **5**:184–186.
- 710 Goudet, J., T. Kay, and B. S. Weir. 2018. How to estimate kinship. *Mol. Ecol.* **27**:4121–4135.  
711 Blackwell Publishing Ltd.
- 712 Graffelman, J. 2015. Exploring Diallelic Genetic Markers: The {HardyWeinberg} Package. *J. Stat.*  
713 *Softw.* **64**:1–23.
- 714 Graffelman, J., and J. Morales-Camarena. 2008. Graphical tests for Hardy-Weinberg Equilibrium  
715 based on the ternary plot. *Hum. Hered.* **65**:77–84.
- 716 Grant, P. R. 1999. *Ecology and Evolution of Darwin's Finches*. Princeton University Press.

- 717 Grant, P. R. 1998. *Evolution on Islands*. Oxford University Press, Oxford, UK.
- 718 Gu, J., Q. Liang, C. Liu, and S. Li. 2020. Genomic Analyses Reveal Adaptation to Hot Arid and  
719 Harsh Environments in Native Chickens of China. *Front. Genet.* **11**:582355.
- 720 Halonen, J. I., A. Zanobetti, D. Sparrow, P. S. Vokonas, and J. Schwartz. 2011. Relationship  
721 between outdoor temperature and blood pressure. *Occup. Environ. Med.* **68**:296–301.
- 722 Hijmans, R. J., S. E. Cameron, J. L. Parra, P. G. Jones, and A. Jarvis. 2005. Very high resolution  
723 interpolated climate surfaces for global land areas. *Int. J. Climatol.* **25**:1965–1978. John  
724 Wiley & Sons, Ltd.
- 725 Hoffmann, T. J., G. B. Ehret, P. Nandakumar, D. Ranatunga, C. Schaefer, P. Y. Kwok, C. Iribarren,  
726 A. Chakravarti, and N. Risch. 2017. Genome-wide association analyses using electronic  
727 health records identify new loci influencing blood pressure variation. *Nat. Genet.* **49**:54–64.
- 728 Hutterer, R., L. F. Lopez-Jurado, and P. Vogel. 1987. The shrews of the eastern Canary Islands: A  
729 new species (mammalia: Soricidae). *J. Nat. Hist.* **21**:1347–1357.
- 730 Illera, J.C., Spurgin, L.G., Rodriguez-Exposito, E., Nogales, M. and Rando, J.C., 2016. What are we  
731 learning about speciation and extinction from the Canary Islands?. *Ardeola*, **63**(1), pp.15-  
732 33.
- 733 Juan, C., B. C. Emerson, P. Oromí, and G. M. Hewitt. 2000. *Colonization and diversification:  
734 Towards a phylogeographic synthesis for the Canary Islands*. Elsevier Ltd.
- 735 Keller, L. F., and D. M. Waller. 2002. Inbreeding effects in wild populations. *Trends Ecol. Evol.*  
736 **17**:230–241.
- 737 Kichaev, G., G. Bhatia, P. R. Loh, S. Gazal, K. Burch, M. K. Freund, A. Schoech, B. Pasaniuc, and  
738 A. L. Price. 2019. Leveraging Polygenic Functional Enrichment to Improve GWAS Power.  
739 *Am. J. Hum. Genet.* **104**:65–75. Cell Press.
- 740 Korneliusen, T. S., A. Albrechtsen, and R. Nielsen. 2014. ANGSD: Analysis of Next Generation  
741 Sequencing Data. *BMC Bioinformatics* **15**:1–13. BioMed Central Ltd.
- 742 Kulminski, A. M., J. Huang, Y. Loika, K. G. Arbee, O. Bagley, A. Yashkin, M. Duan, and I.  
743 Culminskaya. 2018. Strong impact of natural-selection-free heterogeneity in genetics of  
744 age-related phenotypes. *Aging (Albany, NY)*. **10**:492–514. Impact Journals LLC.
- 745 Lamichhaney, S., J. Berglund, M. S. Almén, K. Maqbool, M. Grabherr, A. Martinez-Barrio, M.  
746 Promerová, C. J. Rubin, C. Wang, N. Zamani, B. R. Grant, P. R. Grant, M. T. Webster, and L.  
747 Andersson. 2015. Evolution of Darwin's finches and their beaks revealed by genome  
748 sequencing. *Nature* **518**:371–375.
- 749 Leathlobhair, M. N., A. R. Perri, E. K. Irving-Pease, K. E. Witt, A. Linderholm, J. Haile, O.  
750 Lebrasseur, C. Ameen, J. Blick, A. R. Boyko, S. Brace, Y. N. Cortes, S. J. Crockford, A.  
751 Devault, E. A. Dimopoulos, M. Eldridge, J. Enk, S. Gopalakrishnan, K. Gori, V. Grimes, E.  
752 Guiry, A. J. Hansen, A. Hulme-Beaman, J. Johnson, A. Kitchen, A. K. Kasparov, Y. M. Kwon,  
753 P. A. Nikolskiy, C. P. Lope, A. Manin, T. Martin, M. Meyer, K. N. Myers, M. Omura, J. M.  
754 Rouillard, E. Y. Pavlova, P. Sciulli, M. H. S. Sinding, A. Strakova, V. V. Ivanova, C. Widga, E.  
755 Willerslev, V. V. Pitulko, I. Barnes, M. T. P. Gilbert, K. M. Dobney, R. S. Malhi, E. P.  
756 Murchison, G. Larson, and L. A. F. Frantz. 2018. The evolutionary history of dogs in the  
757 Americas. *Science (80-. )*. **361**:81–85. American Association for the Advancement of  
758 Science.
- 759 Lenormand, T. 2002. Gene flow and the limits to natural selection. *Trends Ecol. Evol.* **17**:183–  
760 189. Elsevier Ltd.
- 761 Li, H. 2018. *Minimap2: Pairwise alignment for nucleotide sequences*. *Bioinformatics* **34**:3094–  
762 3100. Oxford University Press.

- 763 Li, H., and R. Durbin. 2009. Fast and accurate short read alignment with Burrows-Wheeler  
764 transform. *Bioinformatics* 25:1754–1760. Oxford University Press.
- 765 Lifjeld, J. T., J. A. Anmarkrud, P. Calabuig, J. E. J. Cooper, L. E. Johannessen, A. Johnsen, A. M.  
766 Kearns, R. F. Lachlan, T. Laskemoen, G. Marthinsen, E. Stensrud, and E. Garcia-Del-Rey.  
767 2016. Species-level divergences in multiple functional traits between the two endemic  
768 subspecies of Blue Chaffinches *Fringilla teydea* in Canary Islands. *BMC Zool.* 1:1–19.  
769 BioMed Central Ltd.
- 770 Liu, C., A. T. Kraja, J. A. Smith, J. A. Brody, N. Franceschini, J. C. Bis, K. Rice, A. C. Morrison, Y. Lu,  
771 S. Weiss, X. Guo, W. Palmas, L. W. Martin, Y. D. I. Chen, P. Surendran, F. Drenos, J. P. Cook,  
772 P. L. Auer, A. Y. Chu, A. Giri, W. Zhao, J. Jakobsdottir, L. A. Lin, J. M. Stafford, N. Amin, H.  
773 Mei, J. Yao, A. Voorman, M. G. Larson, M. L. Grove, A. V. Smith, S. J. Hwang, H. Chen, T.  
774 Huan, G. Kosova, N. O. Stitzel, S. Kathiresan, N. Samani, H. Schunkert, P. Deloukas, M. Li,  
775 C. Fuchsberger, C. Pattaro, M. Gorski, C. Kooperberg, G. J. Papanicolaou, J. E. Rossouw, J. D.  
776 Faul, S. L. R. Kardina, C. Bouchard, L. J. Raffe, A. G. Uitterlinden, O. H. Franco, R. S. Vasan, C.  
777 J. O'Donnell, K. D. Taylor, K. Liu, E. P. Bottinger, O. Gottesman, E. W. Daw, F. Giulianini, S.  
778 Ganesh, E. Salfati, T. B. Harris, L. J. Launer, M. Dörr, S. B. Felix, R. Rettig, H. Völzke, E. Kim,  
779 W. J. Lee, I. Te Lee, W. H. H. Sheu, K. S. Tsosie, D. R. V. Edwards, Y. Liu, A. Correa, D. R.  
780 Weir, U. Völker, P. M. Ridker, E. Boerwinkle, V. Gudnason, A. P. Reiner, C. M. Van Duijn, I. B.  
781 Borecki, T. L. Edwards, A. Chakravarti, J. I. Rotter, B. M. Psaty, R. J. F. Loos, M. Fornage, G.  
782 B. Ehret, C. Newton-Cheh, D. Levy, and D. I. Chasman. 2016. Meta-analysis identifies  
783 common and rare variants influencing blood pressure and overlapping with metabolic trait  
784 loci. *Nat. Genet.* 48:1162–1170.
- 785 Liu, L., M. Bosse, H. J. Megens, L. A. F. Frantz, Y. L. Lee, E. K. Irving-Pease, G. Narayan, M. A. M.  
786 Groenen, and O. Madsen. 2019. Genomic analysis on pygmy hog reveals extensive  
787 interbreeding during wild boar expansion. *Nat. Commun.* 10:1–9. Nature Publishing Group.
- 788 Losos, J. B., T. R. Jackman, A. Larson, K. De Queiroz, and L. Rodríguez-Schettino. 1998.  
789 Contingency and determinism in replicated adaptive radiations of island lizards. *Science*  
790 (80- ). 279:2115–2118.
- 791 Losos, J. B., and R. E. Ricklefs. 2009. Adaptation and diversification on islands. *Nature*  
792 457:830–6. Nature Publishing Group.
- 793 MacArthur, R. H., and E. O. Wilson. 1963. An Equilibrium Theory of Insular Zoogeography.  
794 *Evolution* (N. Y). 17:373–387.
- 795 MacArthur, R. H., and E. O. Wilson. 1967. The theory of island biogeography. Princeton University  
796 Press.
- 797 Machado, A. P., L. Clément, V. Uva, J. Goudet, and A. Roulin. 2018. The Rocky Mountains as a  
798 dispersal barrier between barn owl (*Tyto alba*) populations in North America. *J. Biogeogr.*  
799 1288–1300.
- 800 Machado, A. P., T. Cumer, C. Iseli, E. Beaudoin, M. Dupasquier, N. Guex, K. Dichmann, R.  
801 Lourenço, J. Lusby, H.-D. Martens, L. Prévost, D. Ramsden, A. Roulin, and J. Goudet. 2021.  
802 Unexpected post-glacial colonisation route explains the white colour of barn owls (*Tyto*  
803 *alba*) from the British Isles. bioRxiv, doi: 10.1101/2021.04.23.441058.
- 804 Machado, A. P., A. Topaloudis, T. Cumer, E. Lavanchy, V. A. Bontzorlos, R. Ceccherelli, M. Charter,  
805 N. Kassinis, P. Lymberakis, F. Manzia, A.-L. Ducrest, M. Dupasquier, N. Guex, A. Roulin, and  
806 J. Goudet. n.d. Genomic consequences of colonisation, migration and genetic drift in barn  
807 owl insular populations of the eastern Mediterranean. prep.
- 808 Malinsky, M., R. J. Challis, A. M. Tyers, S. Schiffels, Y. Terai, B. P. Ngatunga, E. A. Miska, R.  
809 Durbin, M. J. Genner, and G. F. Turner. 2015. Genomic islands of speciation separate cichlid  
810 ecomorphs in an East African crater lake. *Science* (80- ). 350:1493–1498.

- 811 Martín, A. and Lorenzo, J.A., 2001. Aves del archipiélago canario. F. Lemus.
- 812 Martin, S. H., and S. M. Van Belleghem. 2017. Exploring evolutionary relationships across the  
813 genome using topology weighting. *Genetics* 206:429–438. Genetics Society of America.
- 814 Masseti, M., 2010. Mammals of the Macaronesian islands (the Azores, Madeira, the Canary and  
815 Cape Verde islands): redefinition of the ecological equilibrium. 3-34.
- 816 Mateo, J.A., Crochet, P.A. and Afonso, O.M., 2011. The species diversity of the genus *Gallotia*  
817 (*Sauria*: *Lacertidae*) during the Holocene on La Gomera (Canary Islands) and the Latin  
818 names of Gomeran giant lizards. *Zootaxa*, 2755(1), pp.66-68.
- 819 Molina-Borja, M. 2003. Sexual dimorphism of *Gallotia atlantica atlantica* and *Gallotia atlantica*  
820 *mahoratae* (*Lacertidae*) from the Eastern Canary Islands. *J. Herpetol.* 37:769–772.
- 821 Newton-Cheh, C., T. Johnson, V. Gateva, M. D. Tobin, M. Bochud, L. Coin, S. S. Najjar, J. H. Zhao,  
822 S. C. Heath, S. Eyheramendy, K. Papadakis, B. F. Voight, L. J. Scott, F. Zhang, M. Farrall, T.  
823 Tanaka, C. Wallace, J. C. Chambers, K. T. Khaw, P. Nilsson, P. Van Der Harst, S. Polidoro, D.  
824 E. Grobbee, N. C. Onland-Moret, M. L. Bots, L. V. Wain, K. S. Elliot, A. Teumer, J. Luan, G.  
825 Lucas, J. Kuusisto, P. R. Burton, D. Hadley, W. L. McArdle, M. Brown, A. Dominiczak, S. J.  
826 Newhouse, N. J. Samani, J. Webster, E. Zeggini, J. S. Beckmann, S. Bergmann, N. Lim, K.  
827 Song, P. Vollenweider, G. Waeber, D. M. Waterworth, X. Yuan, L. Groop, M. Orho-Melander,  
828 A. Allione, A. Di Gregorio, S. Guarrera, S. Panico, F. Ricceri, V. Romanazzi, C. Sacerdote, P.  
829 Vineis, I. Barroso, M. S. Sandhu, R. N. Luben, G. J. Crawford, P. Jousilahti, M. Perola, M.  
830 Boehnke, L. L. Bonnycastle, F. S. Collins, A. U. Jackson, K. L. Mohlke, H. M. Stringham, T. T.  
831 Valle, C. J. Willer, R. N. Bergman, M. A. Morken, A. Döring, C. Gieger, T. Illig, T. Meitinger, E.  
832 Org, A. Pfeufer, H. E. Wichmann, S. Kathiresan, J. Marrugat, C. J. O'Donnell, S. M. Schwartz,  
833 D. S. Siscovick, I. Subirana, N. B. Freimer, A. L. Hartikainen, M. I. McCarthy, P. F. O'Reilly, L.  
834 Peltonen, A. Pouta, P. E. De Jong, H. Snieder, W. H. Van Gilst, R. Clarke, A. Goel, A.  
835 Hamsten, D. Altshuler, M. R. Jarvelin, P. Elliott, E. G. Lakatta, N. Forouhi, N. J. Wareham, R.  
836 J. F. Loos, P. Deloukas, G. M. Lathrop, D. Zelenika, D. P. Strachan, N. Soranzo, F. M.  
837 Williams, G. Zhai, T. D. Spector, J. F. Peden, H. Watkins, L. Ferrucci, M. Caulfield, P. B.  
838 Munroe, G. Berglund, O. Melander, G. Matullo, C. S. Uitterwaal, Y. T. van der Schouw, M. E.  
839 Numans, F. Ernst, G. Homuth, U. Völker, R. Elosua, M. Laakso, J. M. Connell, V. Mooser, V.  
840 Salomaa, J. Tuomilehto, M. Laan, G. Navis, U. Seedorf, A. C. Syvänen, G. Tognoni, S. Sanna,  
841 M. Uda, P. Scheet, D. Schlessinger, A. Scuteri, M. Dörr, S. B. Felix, T. Reffelmann, R. Lorbeer,  
842 H. Völzke, R. Rettig, P. Galan, S. Hercberg, S. A. Bingham, J. S. Kooner, S. Bandinelli, P.  
843 Meneton, G. Abecasis, J. R. Thompson, C. A. Braga Marcano, B. Barke, R. Dobson, J.  
844 Gungadoo, K. L. Lee, A. Onipinla, I. Wallace, M. Xue, D. G. Clayton, H. T. Leung, S. Nutland,  
845 N. M. Walker, J. A. Todd, H. E. Stevens, D. B. Dunger, B. Widmer, K. Downes, L. R. Cardon, D.  
846 P. Kwiatkowski, J. C. Barrett, D. Evans, A. P. Morris, C. M. Lindgren, N. W. Rayner, N. J.  
847 Timpson, E. Lyons, F. Vannberg, A. V. S. Hill, Y. Y. Teo, K. A. Rockett, N. Craddock, A. P.  
848 Attwood, C. Bryan, S. J. Bumpstead, A. Chaney, J. Ghorri, R. G. William, S. E. Hunt, M. Inouye,  
849 E. Keniry, E. King, R. McGinnis, S. Potter, R. Ravindranathan, P. Whittaker, D. Withers, D.  
850 Bentley, C. J. Groves, A. Duncanson, W. H. Ouwehand, J. P. Boorman, B. Cant, J. D. Jolley, A.  
851 S. Knight, K. Koch, N. C. Taylor, N. A. Watkins, T. Winzer, P. S. Braund, R. J. Dixon, M.  
852 Mangino, S. Stevens, P. Donnelly, D. Davidson, J. L. Marchini, I. C. A. Spencer, N. J. Cardin, T.  
853 Ferreira, J. Pereira-Gale, I. B. Hallgrimsdottir, B. N. Howie, Z. Su, D. Vukcevic, D. Easton, U.  
854 Everson, J. M. Hussey, E. Meech, C. V. Prowse, G. R. Walters, R. W. Jones, S. M. Ring, M.  
855 Prembey, G. Breen, D. St. Clair, S. Ceasar, K. Gordon-Smith, C. Fraser, E. K. Green, D.  
856 Grozeva, M. L. Hamshere, P. A. Holmans, I. R. Jones, G. Kirov, V. Moskvina, I. Nikolov, M. C.  
857 O'Donovan, M. J. Owen, N. Craddock, D. A. Collier, A. Elkin, A. Farmer, R. Williamson, P.  
858 McGruffin, A. H. Young, I. N. Ferrier, S. G. Ball, A. J. Balmforth, J. H. Barrett, D. T. Bishop, M.  
859 M. Iles, A. Maqbool, N. Yuldashева, A. S. Hall, F. Bredin, M. Tremelling, M. Parkes, H.  
860 Drummond, C. W. Lees, E. R. Nimmo, J. Satsangi, S. A. Fisher, C. M. Lewis, C. M. Onnie, N. J.  
861 Prescott, C. G. Mathew, A. Forbes, J. Sanderson, C. Mathew, J. Barbour, M. K. Mohiuddin, C.  
862 E. Todhunter, J. C. Mansfield, T. Ahmad, F. R. Cummings, D. P. Jewell, A. Barton, I. N. Bruce,

- 863 H. Donovan, S. Eyre, P. D. Gilbert, S. L. Hider, A. M. Hinks, S. L. John, C. Potter, A. J. Silman,  
864 D. P. M. Symmons, W. Thomson, J. Worthington, T. M. Frayling, R. M. Freathy, H. Lango, J. R.  
865 B. Perry, M. N. Weedon, A. T. Hattersley, B. M. Shields, G. A. Hitman, M. Walker, M. Newport,  
866 G. Sirugo, D. Conway, M. Jallow, L. A. Bradbury, J. L. Pointon, M. A. Brown, C. Farrar, P.  
867 Wordsworth, J. A. Franklyn, J. M. Heward, M. J. Simmonds, S. C. L. Cough, S. Seal, M. R.  
868 Stratton, M. Ban, A. Goris, S. J. Sawcer, and A. Compston. 2009. Genome-wide association  
869 study identifies eight loci associated with blood pressure. *Nat. Genet.* 41:666–676.
- 870 Nogales, M., L. De León, and R. Gómez. 1998. On the presence of the endemic skink *Chalcides*  
871 *simonyi* Steind. 1891 in Lanzarote (Canary Islands). *Amphibia-Reptilia* 19:427–430.
- 872 Nogales, M., Rando, J.C., Valido, A. and Martín, A., 2001. Discovery of a living giant lizard, genus  
873 *Gallotia* (Reptilia: Lacertidae), from La Gomera, Canary Islands. *Herpetologica*, pp.169-179.
- 874 Norder, S. J., K. Proios, R. J. Whittaker, M. R. Alonso, P. A. V. Borges, M. K. Borregaard, R. H.  
875 Cowie, F. B. V. Florens, A. M. de Frias Martins, M. Ibáñez, W. D. Kissling, L. de Nascimento,  
876 R. Otto, C. E. Parent, F. Rigal, B. H. Warren, J. M. Fernández-Palacios, E. E. van Loon, K. A.  
877 Triantis, and K. F. Rijdsdijk. 2019. Beyond the Last Glacial Maximum: Island endemism is  
878 best explained by long-lasting archipelago configurations. *Glob. Ecol. Biogeogr.* 28:184–  
879 197. Blackwell Publishing Ltd.
- 880 O'Brien, K. A., T. S. Simonson, and A. J. Murray. 2020. Metabolic adaptation to high altitude.  
881 Elsevier Ltd.
- 882 Oskarsson, G. R., A. Oddsson, M. K. Magnusson, R. P. Kristjansson, G. H. Halldorsson, E.  
883 Ferkingstad, F. Zink, A. Helgadóttir, E. V. Ivarsdóttir, G. A. Arnadóttir, B. O. Jenson, H.  
884 Katrinardóttir, G. Sveinbjornsson, A. M. Kristinsdóttir, A. L. Lee, J. Saemundsdóttir, L.  
885 Stefansdóttir, J. K. Sigurdsson, O. B. Davidsson, S. Benonisdóttir, A. Jonasdóttir, A.  
886 Jonasdóttir, S. Jonsson, R. L. Gudmundsson, F. W. Asselbergs, V. Tragante, B. Gunnarsson,  
887 G. Masson, G. Thorleifsson, T. Rafnar, H. Holm, I. Olafsson, P. T. Onundarson, D. F.  
888 Gudbjartsson, G. L. Norddahl, U. Thorsteinsdóttir, P. Sulem, and K. Stefansson. 2020.  
889 Predicted loss and gain of function mutations in *ACO1* are associated with erythropoiesis.  
890 *Commun. Biol.* 3:1–10. Nature Research.
- 891 Palacios, C. J. 2004. Current status and distribution of birds of prey in the Canary Islands. *Bird*  
892 *Conserv. Int.* 14:203–213.
- 893 Pestano, J., R. P. Brown, N. M. Suárez, J. Benzal, and S. Fajardo. 2003. Intraspecific evolution of  
894 Canary Island Plecotine bats, based on mtDNA sequences. *Heredity (Edinb).* 90:302–307.  
895 Nature Publishing Group.
- 896 Pickrell, J., and J. Pritchard. 2012. Inference of population splits and mixtures from genome-  
897 wide allele frequency data. *Nat. Preced.*, doi: 10.1038/npre.2012.6956.1. Springer  
898 Science and Business Media LLC.
- 899 Purcell, S., B. Neale, K. Todd-Brown, L. Thomas, M. A. R. Ferreira, D. Bender, J. Maller, P. Sklar, P.  
900 I. W. de Bakker, M. J. Daly, and P. C. Sham. 2007. PLINK: A Tool Set for Whole-Genome  
901 Association and Population-Based Linkage Analyses. *Am. J. Hum. Genet.* 81:559–575.
- 902 R Development Core Team. 2016. R: A language and environment for statistical computing. R  
903 Foundation for Statistical Computing, Vienna, Austria.
- 904 Rodríguez, B., Rodríguez, A., Siverio, F. and Siverio, M., 2018. Factors affecting the spatial  
905 distribution and breeding habitat of an insular cliff-nesting raptor community. *Current*  
906 *zoology*, 64(2), pp.173-181.
- 907 Romano, A, Séchaud, R, Roulin, A. 2020. Geographical variation in bill size provides evidence for  
908 Allen's rule in a cosmopolitan raptor. *Global Ecol Biogeogr.* 29: 65– 75.
- 909 Romano, A., R. Séchaud, and A. Roulin. 2021. Evolution of wing length and melanin-based

- 910 coloration in insular populations of a cosmopolitan raptor. *J. Biogeogr.* 48:961–973.  
911 Blackwell Publishing Ltd.
- 912 Senfeld, T., T. J. Shannon, H. van Grouw, D. M. Pajjmans, E. S. Tavares, A. J. Baker, A. C. Lees,  
913 and J. M. Collinson. 2020. Taxonomic status of the extinct Canary Islands Oystercatcher  
914 *Haematopus meadewaldoi*. *Ibis (Lond. 1859)*. 162:1068–1074. Blackwell Publishing Ltd.
- 915 Siverio, F. 2007. Lechuza común, *Tyto alba*. In Lorenzo, J. A. (Ed.): Atlas de las aves nidificantes  
916 en el archipiélago canario (1997-2003), pp. 304-310. Dirección General de Conservación  
917 de la Naturaleza-Sociedad Española de Ornitología. Madrid.
- 918 Stamatakis, A. 2014. RAxML version 8: A tool for phylogenetic analysis and post-analysis of  
919 large phylogenies. *Bioinformatics* 30:1312–1313. Oxford University Press.
- 920 Steinbauer, M. J., R. Field, J. A. Grytnes, P. Trigas, C. Ah-Peng, F. Attorre, H. J. B. Birks, P. A. V.  
921 Borges, P. Cardoso, C. H. Chou, M. De Sanctis, M. M. de Sequeira, M. C. Duarte, R. B. Elias,  
922 J. M. Fernández-Palacios, R. Gabriel, R. E. Gereau, R. G. Gillespie, J. Greimler, D. E. V. Harter,  
923 T. J. Huang, S. D. H. Irl, D. Jeanmonod, A. Jentsch, A. S. Jump, C. Kueffer, S. Nogué, R. Otto,  
924 J. Price, M. M. Romeiras, D. Strasberg, T. Stuessy, J. C. Svenning, O. R. Vetaas, and C.  
925 Beierkuhnlein. 2016. Topography-driven isolation, speciation and a global increase of  
926 endemism with elevation. *Glob. Ecol. Biogeogr.* 25:1097–1107. Blackwell Publishing Ltd.
- 927 Surendran, P., F. Drenos, R. Young, H. Warren, J. P. Cook, A. K. Manning, N. Grarup, X. Sim, D. R.  
928 Barnes, K. Witkowska, J. R. Staley, V. Tragante, T. Tukiainen, H. Yaghootkar, N. Masca, D. F.  
929 Freitag, T. Ferreira, O. Giannakopoulou, A. Tinker, M. Harakalova, E. Mihailov, C. Liu, A. T.  
930 Kraja, S. F. Nielsen, A. Rasheed, M. Samuel, W. Zhao, L. L. Bonnycastle, A. U. Jackson, N.  
931 Narisu, A. J. Swift, L. Southam, J. Marten, J. R. Huyghe, A. Stančáková, C. Fava, T. Ohlsson,  
932 A. Matchan, K. E. Stirrups, J. Bork-Jensen, A. P. Gjesing, J. Kontto, M. Perola, S. Shaw-  
933 Hawkins, A. S. Havulinna, H. Zhang, L. A. Donnelly, C. J. Groves, N. W. Rayner, M. J. Neville,  
934 N. R. Robertson, A. M. Yiorkas, K. H. Herzig, E. Kajantie, W. Zhang, S. M. Willems, L.  
935 Lannfelt, G. Malerba, N. Soranzo, E. Trabetti, N. Verweij, E. Evangelou, A. Moayyeri, A. C.  
936 Vergnaud, C. P. Nelson, A. Poveda, T. V. Varga, M. Caslake, A. J. M. De Craen, S. Trompet, J.  
937 Luan, R. A. Scott, S. E. Harris, D. C. M. Liewald, R. Marioni, C. Menni, A. E. Farmaki, G.  
938 Hallmans, F. Renström, J. E. Huffman, M. Hassinen, S. Burgess, R. S. Vasani, J. F. Felix, M.  
939 Uria-Nickelsen, A. Malarstig, D. F. Reilly, M. Hoek, T. F. Vogt, H. Lin, W. Lieb, M. Traylor, H. S.  
940 Markus, H. M. Highland, A. E. Justice, E. Marouli, J. Lindström, M. Uusitupa, P. Komulainen,  
941 T. A. Lakka, R. Rauramaa, O. Polasek, I. Rudan, O. Rolandsson, P. W. Franks, G. Dedoussis,  
942 T. D. Spector, P. Jousilahti, S. Männistö, I. J. Deary, J. M. Starr, C. Langenberg, N. J.  
943 Wareham, M. J. Brown, A. F. Dominiczak, J. M. Connell, J. W. Jukema, N. Sattar, I. Ford, C. J.  
944 Packard, T. Esko, R. Mägi, A. Metspalu, R. A. De Boer, P. Van Der Meer, P. Van Der Harst, G.  
945 Gambaro, E. Ingelsson, L. Lind, P. I. W. De Bakker, M. E. Numans, I. Brandslund, C.  
946 Christensen, E. R. B. Petersen, E. Korpi-Hyövälti, H. Oksa, J. C. Chambers, J. S. Kooner, A. I.  
947 F. Blakemore, S. Franks, M. R. Jarvelin, L. L. Husemoen, A. Linneberg, T. Skaaby, B.  
948 Thuesen, F. Karpe, J. Tuomilehto, A. S. F. Doney, A. D. Morris, C. N. A. Palmer, O. L. Holmen,  
949 K. Hveem, C. J. Willer, T. Tuomi, L. Groop, A. Käräjämäki, A. Palotie, S. Ripatti, V. Salomaa,  
950 D. S. Alam, A. A. S. Majumder, E. Di Angelantonio, R. Chowdhury, M. I. McCarthy, N. Poulter,  
951 A. V. Stanton, P. Sever, P. Amouyel, D. Arveiler, S. Blankenberg, J. Ferrières, F. Kee, K.  
952 Kuulasmaa, M. Müller-Nurasyid, G. Veronesi, J. Virtamo, P. Deloukas, P. Elliott, E. Zeggini, S.  
953 Kathiresan, O. Melander, J. Kuusisto, M. Laakso, S. Padmanabhan, D. J. Porteous, C.  
954 Hayward, G. Scotland, F. S. Collins, K. L. Mohlke, T. Hansen, O. Pedersen, M. Boehnke, H. M.  
955 Stringham, P. Frossard, C. Newton-Cheh, M. D. Tobin, B. G. Nordestgaard, M. J. Caulfield, A.  
956 Mahajan, A. P. Morris, M. Tomaszewski, N. J. Samani, D. Saleheen, F. W. Asselbergs, C. M.  
957 Lindgren, J. Danesh, L. V. Wain, A. S. Butterworth, J. M. M. Howson, and P. B. Munroe. 2016.  
958 Trans-ancestry meta-analyses identify rare and common variants associated with blood  
959 pressure and hypertension. *Nat. Genet.* 48:1151–1161. Nature Publishing Group.
- 960 Thorpe, R. S., and M. Baez. 1993. Geographic variation in scalation of the lizard *Gallotia stehlini*  
961 within the island of Gran Canaria. *Biol. J. Linn. Soc.* 48:75–87. John Wiley & Sons, Ltd.



- 962 Tigano, A., and V. L. Friesen. 2016. Genomics of local adaptation with gene flow. *Mol. Ecol.*  
963 25:2144–2164.
- 964 Turcot, V., Y. Lu, H. M. Highland, C. Schurmann, A. E. Justice, R. S. Fine, J. P. Bradfield, T. Esko, A.  
965 Giri, M. Graff, X. Guo, A. E. Hendricks, T. Karaderi, A. Lempradl, A. E. Locke, A. Mahajan, E.  
966 Marouli, S. Sivapalaratnam, K. L. Young, T. Alfred, M. F. Feitosa, N. G. D. Masca, A. K.  
967 Manning, C. Medina-Gomez, P. Mudgal, M. C. Y. Ng, A. P. Reiner, S. Vedantam, S. M.  
968 Willems, T. W. Winkler, G. Abecasis, K. K. Aben, D. S. Alam, S. E. Alharthi, M. Allison, P.  
969 Amouyel, F. W. Asselbergs, P. L. Auer, B. Balkau, L. E. Bang, I. Barroso, L. Bastarache, M.  
970 Benn, S. Bergmann, L. F. Bielak, M. Blüher, M. Boehnke, H. Boeing, E. Boerwinkle, C. A.  
971 Böger, J. Bork-Jensen, M. L. Bots, E. P. Bottinger, D. W. Bowden, I. Brandslund, G. Breen, M.  
972 H. Brilliant, L. Broer, M. Brumat, A. A. Burt, A. S. Butterworth, P. T. Campbell, S. Cappellani,  
973 D. J. Carey, E. Catamo, M. J. Caulfield, J. C. Chambers, D. I. Chasman, Y. D. I. Chen, R.  
974 Chowdhury, C. Christensen, A. Y. Chu, M. Cocca, J. P. Cook, J. Corley, J. Corominas Galbany,  
975 A. J. Cox, D. S. Crosslin, G. Cuellar-Partida, A. D'Eustacchio, J. Danesh, G. Davies, P. I. W.  
976 Bakker, M. C. H. Groot, R. Mutsert, I. J. Deary, G. Dedoussis, E. W. Demerath, M. Heijer, A. I.  
977 Hollander, H. M. Ruijter, J. G. Dennis, J. C. Denny, E. Angelantonio, F. Drenos, M. Du, M. P.  
978 Dubé, A. M. Dunning, D. F. Easton, T. L. Edwards, D. Ellinghaus, P. T. Ellinor, P. Elliott, E.  
979 Evangelou, A. E. Farmaki, I. S. Farooqi, J. D. Faul, S. Fauser, S. Feng, E. Ferrannini, J.  
980 Ferrieres, J. C. Florez, I. Ford, M. Fornage, O. H. Franco, A. Franke, P. W. Franks, N. Friedrich,  
981 R. Frikke-Schmidt, T. E. Galesloot, W. Gan, I. Gandin, P. Gasparini, J. Gibson, V. Giedraitis, A.  
982 P. Gjesing, P. Gordon-Larsen, M. Gorski, H. J. Grabe, S. F. A. Grant, N. Grarup, H. L. Griffiths,  
983 M. L. Grove, V. Gudnason, S. Gustafsson, J. Haessler, H. Hakonarson, A. R. Hammerschlag,  
984 T. Hansen, K. M. Harris, T. B. Harris, A. T. Hattersley, C. T. Have, C. Hayward, L. He, N. L.  
985 Heard-Costa, A. C. Heath, I. M. Heid, Ø. Helgeland, J. Hernesniemi, A. W. Hewitt, O. L.  
986 Holmen, G. K. Hovingh, J. M. M. Howson, Y. Hu, P. L. Huang, J. E. Huffman, M. A. Ikram, E.  
987 Ingelsson, A. U. Jackson, J. H. Jansson, G. P. Jarvik, G. B. Jensen, Y. Jia, S. Johansson, M. E.  
988 Jørgensen, T. Jørgensen, J. W. Jukema, B. Kahali, R. S. Kahn, M. Kähönen, P. R. Kamstrup,  
989 S. Kanoni, J. Kaprio, M. Karaleftheri, S. L. R. Kardina, F. Karpe, S. Kathiresan, F. Kee, L. A.  
990 Kiemenev, E. Kim, H. Kitajima, P. Komulainen, J. S. Kooner, C. Kooperberg, T. Korhonen, P.  
991 Kovacs, H. Kuivaniemi, Z. Kutalik, K. Kuulasmaa, J. Kuusisto, M. Laakso, T. A. Lakka, D.  
992 Lamparter, E. M. Lange, L. A. Lange, C. Langenberg, E. B. Larson, N. R. Lee, T. Lehtimäki, C.  
993 E. Lewis, H. Li, J. Li, R. Li-Gao, H. Lin, K. H. Lin, L. A. Lin, X. Lin, L. Lind, J. Lindström, A.  
994 Linneberg, C. T. Liu, D. J. Liu, Y. Liu, K. S. Lo, A. Lophatananon, A. J. Lotery, A. Loukola, J.  
995 Luan, S. A. Lubitz, L. P. Lytykäinen, S. Männistö, G. Marenne, A. L. Mazul, M. I. McCarthy, R.  
996 McKean-Cowdin, S. E. Medland, K. Meidtner, L. Milani, V. Mistry, P. Mitchell, K. L. Mohlke, L.  
997 Moilanen, P. Moitry, G. W. Montgomery, D. O. Mook-Kanamori, C. Moore, T. A. Mori, A. D.  
998 Morris, A. P. Morris, M. Müller-Nurasyid, P. B. Munroe, M. A. Nalls, N. Narisu, C. P. Nelson, M.  
999 Neville, S. F. Nielsen, K. Nikus, P. R. Njølstad, B. G. Nordestgaard, D. R. Nyholt, J. R.  
1000 O'Connell, M. L. O'Donoghue, L. M. Olde Loohuis, R. A. Ophoff, K. R. Owen, C. J. Packard, S.  
1001 Padmanabhan, C. N. A. Palmer, N. D. Palmer, G. Pasterkamp, A. P. Patel, A. Pattie, O.  
1002 Pedersen, P. L. Peissig, G. M. Peloso, C. E. Pennell, M. Perola, J. A. Perry, J. R. B. Perry, T. H.  
1003 Pers, T. N. Person, A. Peters, E. R. B. Petersen, P. A. Peyser, A. Pirie, O. Polasek, T. J.  
1004 Polderman, H. Puolijoki, O. T. Raitakari, A. Rasheed, R. Rauramaa, D. F. Reilly, F. Renström,  
1005 M. Rheinberger, P. M. Ridker, J. D. Rioux, M. A. Rivas, D. J. Roberts, N. R. Robertson, A.  
1006 Robino, O. Rolandsson, I. Rudan, K. S. Ruth, D. Saleheen, V. Salomaa, N. J. Samani, Y.  
1007 Sapkota, N. Sattar, R. E. Schoen, P. J. Schreiner, M. B. Schulze, R. A. Scott, M. P. Segura-  
1008 Lepe, S. H. Shah, W. H. H. Sheu, X. Sim, A. J. Slater, K. S. Small, A. V. Smith, L. Southam, T.  
1009 D. Spector, E. K. Speliotes, J. M. Starr, K. Stefansson, V. Steinthorsdottir, K. E. Stirrups, K.  
1010 Strauch, H. M. Stringham, M. Stumvoll, L. Sun, P. Surendran, A. J. Swift, H. Tada, K. E.  
1011 Tansey, J. C. Tardif, K. D. Taylor, A. Teumer, D. J. Thompson, G. Thorleifsson, U.  
1012 Thorsteinsdottir, B. H. Thuesen, A. Tönjes, G. Tromp, S. Trompet, E. Tsafantakis, J.  
1013 Tuomilehto, A. Tybjaerg-Hansen, J. P. Tyrer, R. Uher, A. G. Uitterlinden, M. Uusitupa, S. W.  
1014 Laan, C. M. Duijn, N. Leeuwen, J. Van Setten, M. Vanhala, A. Varbo, T. V. Varga, R. Varma, D.  
1015 R. Velez Edwards, S. H. Vermeulen, G. Veronesi, H. Vestergaard, V. Vitart, T. F. Vogt, U.  
1016 Völker, D. Vuckovic, L. E. Wagenknecht, M. Walker, L. Wallentin, F. Wang, C. A. Wang, S.

- 1017 Wang, Y. Wang, E. B. Ware, N. J. Wareham, H. R. Warren, D. M. Waterworth, J. Wessel, H. D.  
1018 White, C. J. Willer, J. G. Wilson, D. R. Witte, A. R. Wood, Y. Wu, H. Yaghoobkar, J. Yao, P. Yao,  
1019 L. M. Yerges-Armstrong, R. Young, E. Zeggini, X. Zhan, W. Zhang, J. H. Zhao, W. Zhao, W.  
1020 Zhou, K. T. Zondervan, J. I. Rotter, J. A. Pospisilik, F. Rivadeneira, I. B. Borecki, P. Deloukas,  
1021 T. M. Frayling, G. Lettre, K. E. North, C. M. Lindgren, J. N. Hirschhorn, and R. J. F. Loos. 2018.  
1022 Protein-altering variants associated with body mass index implicate pathways that control  
1023 energy intake and expenditure in obesity. *Nat. Genet.* 50:26–35. Nature Publishing Group.
- 1024 Uva, V., M. Päckert, A. Cibois, L. Fumagalli, and A. Roulin. 2018. Comprehensive molecular  
1025 phylogeny of barn owls and relatives (Family: Tytonidae), and their six major Pleistocene  
1026 radiations. *Mol. Phylogenet. Evol.* 125:127–137. Academic Press.
- 1027 van der Auwera, G. A., M. O. Carneiro, C. Hartl, R. Poplin, G. del Angel, A. Levy-Moonshine, T.  
1028 Jordan, K. Shakir, D. Roazen, J. Thibault, E. Banks, K. V. Garimella, D. Altshuler, S. Gabriel,  
1029 and M. A. DePristo. 2013. From FastQ data to high-confidence variant calls: The genome  
1030 analysis toolkit best practices pipeline. *Curr. Protoc. Bioinforma.* 43:11.10.1-11.10.33.  
1031 John Wiley & Sons, Inc., Hoboken, NJ, USA.
- 1032 Vuckovic, D., E. L. Bao, P. Akbari, C. A. Lareau, A. Mousas, T. Jiang, M. H. Chen, L. M. Raffield, M.  
1033 Tardaguila, J. E. Huffman, S. C. Ritchie, K. Megy, H. Ponstingl, C. J. Penkett, P. K. Albers, E.  
1034 M. Wigdor, S. Sakaue, A. Moscati, R. Manansala, K. S. Lo, H. Qian, M. Akiyama, T. M. Bartz,  
1035 Y. Ben-Shlomo, A. Beswick, J. Bork-Jensen, E. P. Bottinger, J. A. Brody, F. J. A. van Rooij, K.  
1036 N. Chitrala, P. W. F. Wilson, H. Choquet, J. Danesh, E. Di Angelantonio, N. Dimou, J. Ding, P.  
1037 Elliott, T. Esko, M. K. Evans, S. B. Felix, J. S. Floyd, L. Broer, N. Grarup, M. H. Guo, Q. Guo, A.  
1038 Greinacher, J. Haessler, T. Hansen, J. M. M. Howson, W. Huang, E. Jorgenson, T. Kacprowski,  
1039 M. Kähönen, Y. Kamatani, M. Kanai, S. Karthikeyan, F. Koskeridis, L. A. Lange, T. Lehtimäki,  
1040 A. Linneberg, Y. Liu, L. P. Lytikäinen, A. Manichaikul, K. Matsuda, K. L. Mohlke, N.  
1041 Mononen, Y. Murakami, G. N. Nadkarni, K. Nikus, N. Pankratz, O. Pedersen, M. Preuss, B.  
1042 M. Psaty, O. T. Raitakari, S. S. Rich, B. A. T. Rodriguez, J. D. Rosen, J. I. Rotter, P. Schubert,  
1043 C. N. Spracklen, P. Surendran, H. Tang, J. C. Tardif, M. Ghanbari, U. Völker, H. Völzke, N. A.  
1044 Watkins, S. Weiss, N. Cai, K. Kundu, S. B. Watt, K. Walter, A. B. Zonderman, K. Cho, Y. Li, R.  
1045 J. F. Loos, J. C. Knight, M. Georges, O. Stegle, E. Evangelou, Y. Okada, D. J. Roberts, M.  
1046 Inouye, A. D. Johnson, P. L. Auer, W. J. Astle, A. P. Reiner, A. S. Butterworth, W. H.  
1047 Ouwehand, G. Lettre, V. G. Sankaran, and N. Soranzo. 2020. The Polygenic and Monogenic  
1048 Basis of Blood Traits and Diseases. *Cell* 182:1214-1231.e11. Cell Press.
- 1049 Wain, L. V., A. Vaez, R. Jansen, R. Joehanes, P. J. Van Der Most, A. M. Erzurumluoglu, P. F.  
1050 O'Reilly, C. P. Cabrera, H. R. Warren, L. M. Rose, G. C. Verwoert, J. J. Hottenga, R. J.  
1051 Strawbridge, T. Esko, D. E. Arking, S. J. Hwang, X. Guo, Z. Kutalik, S. Trompet, N. Shrine, A.  
1052 Teumer, J. S. Ried, J. C. Bis, A. V. Smith, N. Amin, I. M. Nolte, L. P. Lytikäinen, A. Mahajan,  
1053 N. J. Wareham, E. Hofer, P. K. Joshi, K. Kristiansson, M. Traglia, A. S. Havulinna, A. Goel, M.  
1054 A. Nalls, S. Söber, D. Vuckovic, J. Luan, F. M. Del Greco, K. L. Ayers, J. Marrugat, D. Ruggiero,  
1055 L. M. Lopez, T. Niiranen, S. Enroth, A. U. Jackson, C. P. Nelson, J. E. Huffman, W. Zhang, J.  
1056 Marten, I. Gandin, S. E. Harris, T. Zemunik, Y. Lu, E. Evangelou, N. Shah, M. H. De Borst, M.  
1057 Mangino, B. P. Prins, A. Campbell, R. Li-Gao, G. Chauhan, C. Oldmeadow, G. Abecasis, M.  
1058 Abedi, C. M. Barbieri, M. R. Barnes, C. Batini, J. Beilby, T. Blake, M. Boehnke, E. P. Bottinger,  
1059 P. S. Braund, M. Brown, M. Brumat, H. Campbell, J. C. Chambers, M. Cocca, F. Collins, J.  
1060 Connell, H. J. Cordell, J. J. Damman, G. Davies, E. J. De Geus, R. De Mutsert, J. Deelen, Y.  
1061 Demirkale, A. S. F. Doney, M. Dörr, M. Farrall, T. Ferreira, M. Frånberg, H. Gao, V. Giedraitis,  
1062 C. Gieger, F. Giulianini, A. J. Gow, A. Hamsten, T. B. Harris, A. Hofman, E. G. Holliday, J. Hui,  
1063 M. R. Jarvelin, Å. Johansson, A. D. Johnson, P. Jousilahti, A. Jula, M. Kähönen, S. Kathiresan,  
1064 K. T. Khaw, I. Kolcic, S. Koskinen, C. Langenberg, M. Larson, L. J. Launer, B. Lehne, D. C. M.  
1065 Liewald, L. Lin, L. Lind, F. Mach, C. Mamasoula, C. Menni, B. Mifsud, Y. Milaneschi, A.  
1066 Morgan, A. D. Morris, A. C. Morrison, P. J. Munson, P. Nandakumar, Q. T. Nguyen, T. Nutile,  
1067 A. J. Oldehinkel, B. A. Oostra, E. Org, S. Padmanabhan, A. Palotie, G. Paré, A. Pattie, B. W. J.  
1068 H. Penninx, N. Poulter, P. P. Pramstaller, O. T. Raitakari, M. Ren, K. Rice, P. M. Ridker, H.  
1069 Riese, S. Ripatti, A. Robino, J. I. Rotter, I. Rudan, Y. Saba, A. Saint Pierre, C. F. Sala, A. P.

- 1070 Sarin, R. Schmidt, R. Scott, M. A. Seelen, D. C. Shields, D. Siscovick, R. Sorice, A. Stanton,  
1071 D. J. Stott, J. Sundström, M. Swertz, K. D. Taylor, S. Thom, I. Tzoulaki, C. Tzourio, A. G.  
1072 Uitterlinden, U. Völker, P. Vollenweider, S. Wild, G. Willemsen, A. F. Wright, J. Yao, S.  
1073 Thériault, D. Conen, J. Attia, P. Sever, S. Debette, D. O. Mook-Kanamori, E. Zeggini, T. D.  
1074 Spector, P. Van Der Harst, C. N. A. Palmer, A. C. Vergnaud, R. J. F. Loos, O. Polasek, J. M.  
1075 Starr, G. Giroto, C. Hayward, J. S. Kooner, C. M. Lindgren, V. Vitart, N. J. Samani, J.  
1076 Tuomilehto, U. Gyllensten, P. Knekt, I. J. Deary, M. Ciullo, R. Elosua, B. D. Keavney, A. A.  
1077 Hicks, R. A. Scott, P. Gasparini, M. Laan, Y. Liu, H. Watkins, C. A. Hartman, V. Salomaa, D.  
1078 Toniolo, M. Perola, J. F. Wilson, H. Schmidt, J. H. Zhao, T. Lehtimäki, C. M. Van Duijn, V.  
1079 Gudnason, B. M. Psaty, A. Peters, R. Rettig, A. James, J. W. Jukema, D. P. Strachan, W.  
1080 Palmas, A. Metspalu, E. Ingelsson, D. I. Boomsma, O. H. Franco, M. Bochud, C. Newton-  
1081 Cheh, P. B. Munroe, P. Elliott, D. I. Chasman, A. Chakravarti, J. Knight, A. P. Morris, D. Levy,  
1082 M. D. Tobin, H. Snieder, M. J. Caulfield, and G. B. Ehret. 2017. Novel Blood Pressure Locus  
1083 and Gene Discovery Using Genome-Wide Association Study and Expression Data Sets from  
1084 Blood and the Kidney. *Hypertension* 70:e4–e19. Lippincott Williams and Wilkins.
- 1085 Warren, B. H., D. Simberloff, R. E. Ricklefs, R. Aguilée, F. L. Condamine, D. Gravel, H. Morlon, N.  
1086 Mouquet, J. Rosindell, J. Casquet, E. Conti, J. Cornuault, J. M. Fernández-Palacios, T. Hengl,  
1087 S. J. Norder, K. F. Rijdsdijk, I. Sanmartín, D. Strasberg, K. A. Triantis, L. M. Valente, R. J.  
1088 Whittaker, R. G. Gillespie, B. C. Emerson, and C. Thébaud. 2015. Islands as model systems  
1089 in ecology and evolution: Prospects fifty years after MacArthur-Wilson.
- 1090 Weir, B. S., L. R. Cardon, A. D. Anderson, D. M. Nielsen, and W. G. Hill. 2005. Measures of human  
1091 population structure show heterogeneity among genomic regions. *Genome Res.* 15:1468–  
1092 1476. Cold Spring Harbor Laboratory Press.
- 1093 Weir, B. S., and J. Goudet. 2017. A unified characterization of population structure and  
1094 relatedness. *Genetics* 206:2085–2103.
- 1095 Witt, K. E., and E. Huerta-Sánchez. 2019. Convergent evolution in human and domesticate  
1096 adaptation to high-altitude environments.
- 1097 Zheng, X., D. Levine, J. Shen, S. M. Gogarten, C. Laurie, and B. S. Weir. 2012. A high-performance  
1098 computing toolset for relatedness and principal component analysis of SNP data.  
1099 *Bioinformatics* 28:3326–3328.
- 1100 Zhu, Z., Y. Guo, H. Shi, C. L. Liu, R. A. Panganiban, W. Chung, L. J. O'Connor, B. E. Himes, S. Gazal,  
1101 K. Hasegawa, C. A. Camargo, L. Qi, M. F. Moffatt, F. B. Hu, Q. Lu, W. O. C. Cookson, and L.  
1102 Liang. 2020. Shared genetic and experimental links between obesity-related traits and  
1103 asthma subtypes in UK Biobank. *J. Allergy Clin. Immunol.* 145:537–549. Mosby Inc.
- 1104

## 1105 Tables & Figures

1106 **Table 1** – Genetic diversity and population differentiation of barn owls from the Mediterranean Basin  
 1107 and the Canary Islands. Right-hand-side of the table shows the matrix of population pairwise  $F_{ST}$ .

| Population     | Abbrev. | N  | #PA    | #rPA              | $H_o$            | $F_{IS}$         | $F_{IT}$         | $F_{ST}$ | EC    | WC    | MA     | PT    | IS    |
|----------------|---------|----|--------|-------------------|------------------|------------------|------------------|----------|-------|-------|--------|-------|-------|
| Eastern Canary | EC      | 10 | 324458 | 265175<br>(3829)  | 0.161<br>(0.013) | -0.015<br>(0.08) | 0.10<br>(0.07)   | EC       | 0.112 | 0.081 | 0.061  | 0.060 | 0.088 |
| Western Canary | WC      | 9  | 288313 | 288313            | 0.167<br>(0.006) | -0.030<br>(0.04) | 0.07<br>(0.03)   | WC       | 0.081 | 0.105 | 0.055  | 0.054 | 0.083 |
| Morocco        | MA      | 3  | 234524 | 692508<br>(13287) | 0.190<br>(0.001) | -0.04<br>(0.01)  | -0.06<br>(0.01)  | MA       | 0.061 | 0.055 | -0.013 | 0.007 | 0.034 |
| Portugal       | PT      | 9  | 669889 |                   | 0.182<br>(0.008) | -0.013<br>(0.04) | -0.01<br>(0.04)  | PT       | 0.060 | 0.054 | 0.007  | 0.014 | 0.039 |
| Israel         | IS      | 9  | 703392 | 703392            | 0.180<br>(0.002) | -0.036<br>(0.04) | -0.004<br>(0.01) | IS       | 0.088 | 0.083 | 0.034  | 0.039 | 0.050 |

1108 N – number of sampled individuals; #PA – private alleles in each population; #rPA – private alleles  
 1109 (SD) rarefied to 9 individuals per population (note that PT and MA were merged);  $H_o$  – mean  
 1110 observed heterozygosity (SD);  $F_{IS}$  - population level inbreeding coefficient (SD);  $F_{IT}$ : mean individual  
 1111 inbreeding coefficient relative to the meta-population (SD).  $F_{ST}$ : pairwise and population specific  $F_{ST}$ .

1112

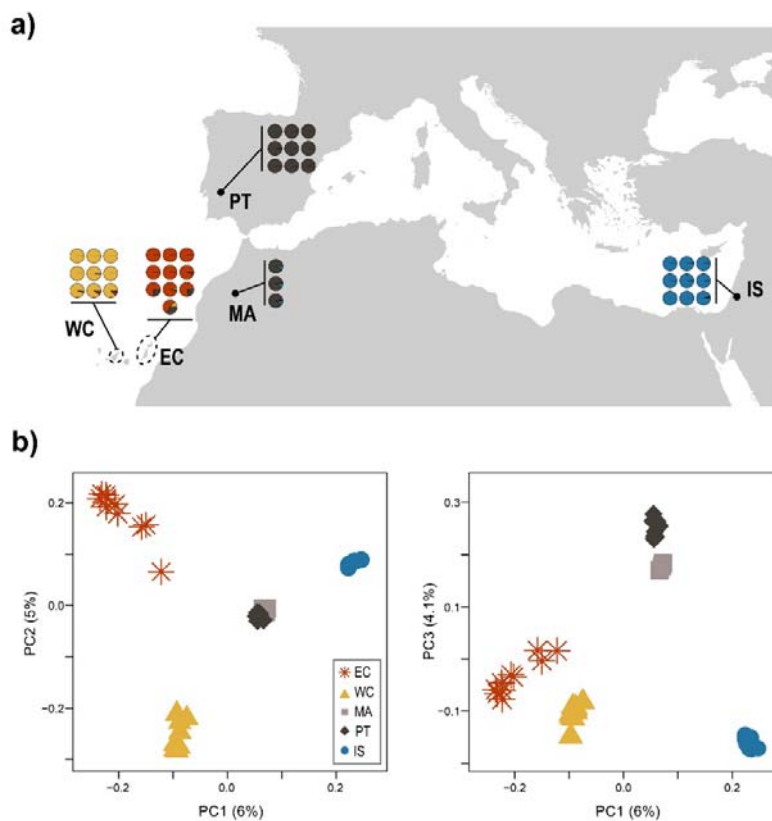

1113 **Figure 1** – Population structure of barn owls from the Mediterranean Basin and the Canary Islands. **a)**  
 1114 Individual admixture proportion of each of  $K=4$  lineages as determined by sNMF. Black dots are  
 1115 located at the approximate centroid of each sampled population. Dashed lines encircle the island(s)  
 1116 sampled for each Canary population. **b)** PCA of the 40 individuals. Point shape and colour denote  
 1117 populations according to the legend. Axes one to three are shown and values in parenthesis indicate  
 1118 the percentage of variance explained by each axis.  
 1119

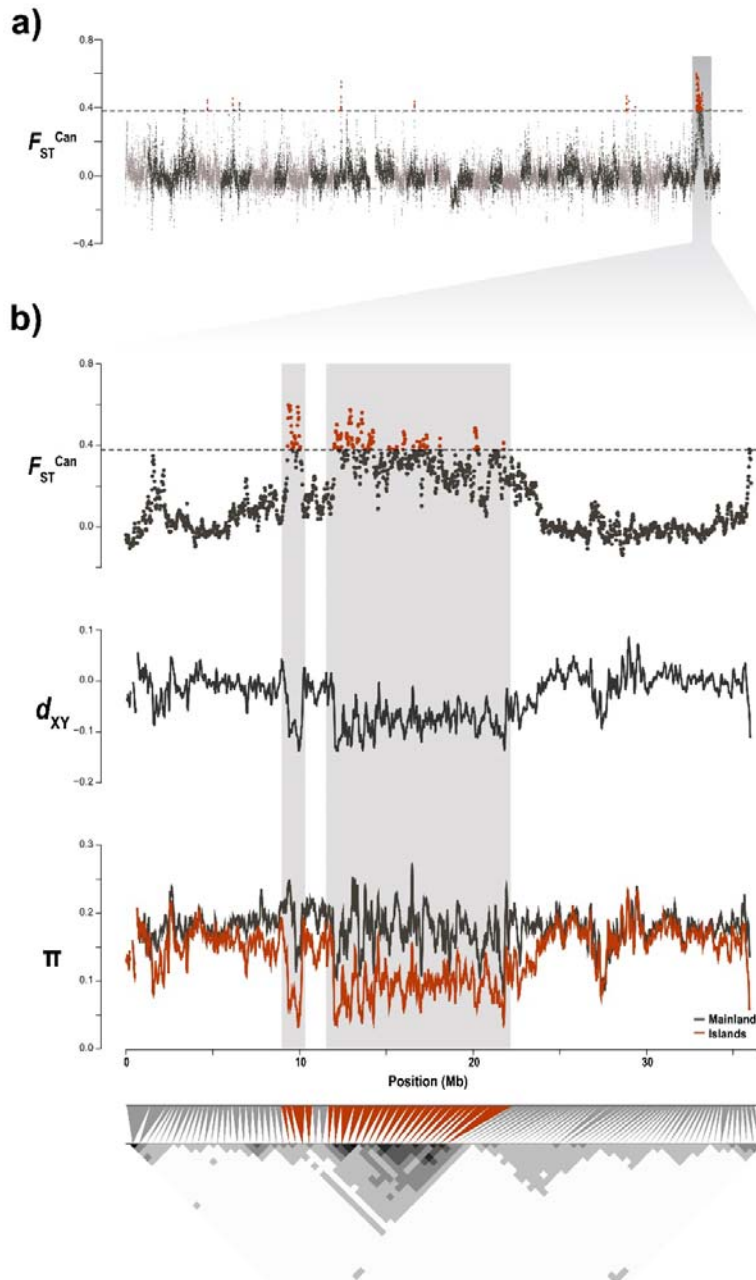

1120

1121 **Figure 2** – Genomic landscape of differentiation between insular and mainland barn owls. **a)**  
 1122 Genome-wide beta comparison between individuals from the Canary Islands (EC & WC) and from the  
 1123 mainland (PT & IS). Each dot represents a 100kb window. Dashed line indicates the 5 SD threshold  
 1124 used to identify genomic regions of high differentiation, emphasised in red. Alternating grey colours  
 1125 denote different scaffolds. Shaded vertical bar highlights Scaffold 100006. **b)** Zoom on Scaffold  
 1126 100006 and, in particular, the ~15 Mb long highly differentiated genomic region (background  
 1127 shading) over windows of 100 kb. From top to bottom, we see in this region a high  $F_{ST}^{Can}$  between  
 1128 insular and mainland barn owls, low absolute distance ( $d_{XY}$ ) between both islands (scaled with  
 1129 mean=0) and reduction of nucleotide diversity ( $\pi$ ) among insular individuals (red line) compared to  
 1130 the mainland (black line). The bottom triangular matrix shows pairwise LD ( $r^2$ ) between groups of 100  
 1131 SNP along the chromosome in insular owls. Darker pixels show higher LD. Grey triangles match each

1132 pixel in the matrix diagonal to the region it spans on the chromosome above. Red triangles indicate  
 1133 pixels that overlap the region of high differentiation.

1134

1135

1136

1137

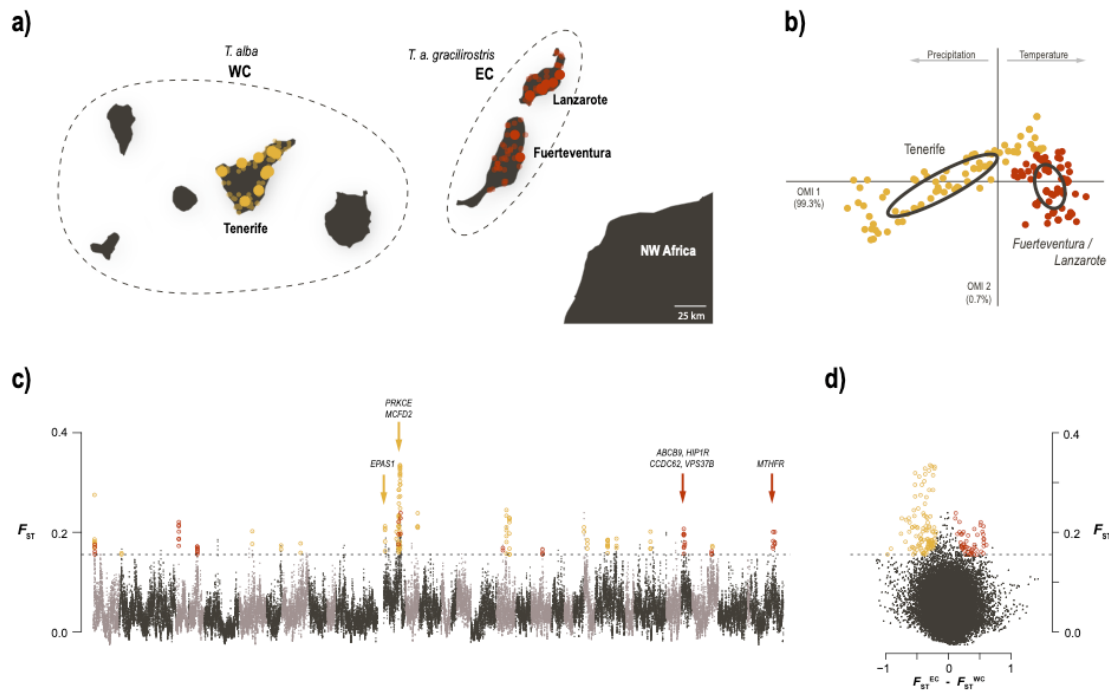

1138

1139 **Figure 3** – Ecological divergence in barn owls from the Canary Islands. **a)** Sampling location of  
 1140 Western (WC; yellow) and Eastern (EC; red) Canary individuals, off the coast of north-western Africa.  
 1141 Sampled islands are named. Large dots indicate individuals sampled for WGS and population  
 1142 genomics analyses; small transparent dots are barn owl observations used in niche analysis. Dashed  
 1143 lines group islands according to barn owl taxonomy. **b)** Climatic niche occupied by the two Canary  
 1144 populations. The first axis varies from cold and wet to hot arid environments. **c)** Genome-wide  $F_{ST}$   
 1145 comparison between individuals from each Canary population. Each dot represents a 100kb window.  
 1146 Alternating grey colours denote different chromosomes. Dashed line indicates the 5 SD  $F_{ST}$  threshold  
 1147 used to identify genomic regions of high differentiation overlaid with  $F_{ST}^{WC}$ , highlighted in yellow and  
 1148  $F_{ST}^{EC}$  in red. Arrows denote the location of genes linked with response to hypoxia in WC; and the  
 1149 cluster of 4 genes linked to morphological ratios and the main gene related to blood pressure in EC.  
 1150 **d)** Same  $F_{ST}$  windows and threshold as in **c)** plotted against the difference between  $F_{ST}^{WC}$  and  $F_{ST}^{EC}$ ,  
 1151 clearly highlight the two sets of windows putatively under local adaptation.

1152
