1 **Genomic bases of insularity and ecological**  
2 **divergence in barn owls (*Tyto alba*) of the Canary**  
3 **Islands**

4

5 Tristan Cumer<sup>1\*Δ</sup>, Ana Paula Machado<sup>1Δ</sup>, Felipe Siverio<sup>2</sup>, Sidi Imad Cherkaoui<sup>3</sup>, Inês Roque<sup>4</sup>, Rui  
6 Lourenço<sup>4</sup>, Motti Charter<sup>5,6</sup>, Alexandre Roulin<sup>1†</sup>, Jérôme Goudet<sup>1,7\*†</sup>

7 \* corresponding author

8 Δ co-first authors – sorted alphabetically

9 † co-senior authors

10

11 Contact details for corresponding author: Department of Ecology and Evolution, Biophore  
12 Building, University of Lausanne, CH-1015 Lausanne, Switzerland. Email: [tristan.cumer@unil.ch](mailto:tristan.cumer@unil.ch);  
13 [Jerome.goudet@unil.ch](mailto:Jerome.goudet@unil.ch)

14

15 <sup>1</sup>Department of Ecology and Evolution, University of Lausanne, Lausanne, Switzerland

16 <sup>2</sup>Canary Islands' Ornithology and Natural History Group (GOHNIC), 38480 Buenavista del Norte,  
17 Tenerife, Canary Islands, Spain

18 <sup>3</sup>Ecole Supérieure de Technologie de Kénitra, Ibn Tofail University, Kénitra, Morocco

19 <sup>4</sup>Mediterranean Institute for Agriculture, Environment and Development, Laboratory of  
20 Ornithology, IIFA, University of Évora, Évora, Portugal

21 <sup>5</sup>Shamir Research Institute, University of Haifa, Katzrin, Israel

22 <sup>6</sup>Department of Geography and Environmental Sciences, University of Haifa, Haifa, Israel

23 <sup>7</sup>Swiss Institute of Bioinformatics, Lausanne, Switzerland

24

25 **Orcid**

26 **Tristan Cumer - 0000-0002-0276-7462**

27 **Ana Paula Machado - 0000-0001-9203-7000**

28 **Felipe Siverio - 0000-0002-0324-0646**

29 **Sidi Imad Cherkaoui - 0000-0002-3349-4321**

30 **Inês Roque - 0000-0002-5952-5915**

31 **Rui Lourenço - 0000-0001-7694-0478**

32 **Motti Charter - 0000-0003-3861-6356**

33 **Alexandre Roulin - 0000-0003-1940-6927**

34 **Jérôme Goudet - 0000-0002-5318-7601**

35

## 36 **Abstract**

37 Islands, and the particular organisms that populate them, have long fascinated biologists. Due  
38 to their isolation, islands offer unique opportunities to study the effect of neutral and adaptive  
39 mechanisms in determining genomic and phenotypical divergence. In the Canary Islands, an  
40 archipelago rich in endemics, the barn owl (*Tyto alba*) is thought to have diverged into a  
41 subspecies (*T. a. gracilirostris*) on the eastern islands, Fuerteventura and Lanzarote. Taking  
42 advantage of 40 whole-genomes and modern population genomics tools, we provide the first  
43 look at the origin and genetic makeup of barn owls of this archipelago. We show that the  
44 Canaries hold diverse, long-standing and monophyletic populations with a neat distinction of  
45 gene pools from the different islands. Using new method, less sensitive to structure than  
46 classical  $F_{ST}$ , to detect regions involved in local adaptation to the insular environment, we  
47 identified a haplotype-like region likely under positive selection in all Canaries individuals. Genes  
48 in this region suggest morphological adaptations to insularity. In the eastern islands, where the  
49 subspecies *T. a. gracilirostris* is present, genomic traces of selection pinpoint signs of locally  
50 adapted body proportions and blood pressure, consistent with the smaller size of this population  
51 living in a hot arid climate. In turn, genomic regions under selection in the western barn owls  
52 from Tenerife showed an enrichment in genes linked to hypoxia, a potential response to  
53 inhabiting a small island with a marked altitudinal gradient. Our results illustrate the interplay of  
54 neutral and adaptive forces in shaping divergence and early onset speciation.

55

56 **Key words** – Local adaptation; Niche analysis; Population genomics; *Tyto alba gracilirostris*;  
57 Whole genome sequencing

58

## 59 Introduction

60 Due to the often-peculiar organisms that inhabit them, islands have always fascinated  
61 naturalists and scientists alike. Since Darwin's first visit to the Galapagos in 1835, the study of  
62 insular populations has been crucial to the development of evolutionary theory (MacArthur and  
63 Wilson 1967; Grant 1998; Warren et al. 2015). Labelled nature's test tubes, islands are home to  
64 a myriad of endemic (sub)species. Moreover, the combination of their relatively small size,  
65 discrete borders, geographical isolation and natural replication provides an excellent setting to  
66 study the evolutionary forces underlying population divergence and speciation (Losos and  
67 Ricklefs 2009). The divergence of insular populations from their founders and surrounding  
68 islands is the result of neutral and selective forces. Disentangling the respective impacts of  
69 these two forces is a challenging task, as they are interconnected and can both contribute to  
70 genetic and phenotypic differentiation.

71 Isolated and small populations, such as those frequently found on islands, are under a markedly  
72 strong influence of genetic drift. This process will alter the genetic makeup of the population by  
73 randomly removing rare alleles and fixating common ones, hence decreasing genetic diversity  
74 (Frankham 1997). This is a common occurrence on islands which, coupled with low gene flow,  
75 can lead to inbreeding (Keller and Waller 2002) and accelerate neutral divergence. Conversely,  
76 the absence of regular gene flow, and the often distinctive ecological conditions of the islands,  
77 can facilitate the action of local adaptation on beneficial alleles (Lenormand 2002; Tigano and  
78 Friesen 2016). This process can lead to the emergence of ecomorphs via ecological divergence  
79 as populations adapt to unfilled insular niches (Losos and Ricklefs 2009), particularly so in  
80 remote islands that are colonized less often (MacArthur and Wilson 1963). Ecomorphs can  
81 occur in different islands or in the same one (Gillespie et al. 1997; Losos et al. 1998; Gillespie  
82 2004), a concept mirrored in inland lakes (Malinsky et al. 2015), the aquatic homologous of  
83 islands. Eventually, ecomorphs can become new subspecies or even species and, in extreme  
84 cases, result in adaptive radiations as illustrated by Darwin's finches (Grant 1999; Lamichhaney  
85 et al. 2015).

86 The Afro-European barn owl (*Tyto alba*) is a non-migratory, nocturnal raptor present from  
87 Scandinavia to Southern Africa. It is also found on numerous islands and archipelagos where  
88 subspecies have often been described (Uva et al. 2018). A recent study of the species' genetic  
89 structure in the Western Palearctic (Cumer et al. 2021) described two main lineages occupying  
90 this region: the eastern lineage in the Levant and the western in Europe. In addition, Cumer et  
91 al. (2021) showed that barn owls from Tenerife (Canary Islands) were very distinct from both  
92 lineages. The Canaries are a volcanic archipelago that was formed several million years ago  
93 (Anguita and Hernán 2000) about 100 km from the coast of north-western Africa and was never  
94 connected to the mainland. This long-term isolation (Norder et al. 2019), along with its  
95 subtropical climate and elevation gradients (Steinbauer et al. 2016), has resulted in a high level  
96 of endemism, for example in plants (Carine et al. 2009), reptiles (Thorpe and Baez 1993;  
97 Nogales et al. 1998; Nogales et al. 2001; Molina-Borja 2003; Mateo et al. 2011), mammals  
98 (Hutterer et al. 1987; Pestano et al. 2003; Firmat et al. 2010; Masseti 2010) and birds (Illera et  
99 al. 2016; Lifjeld et al. 2016; Rodríguez et al. 2020; Senfeld et al. 2020). Among them, an  
100 endemic barn owl subspecies, *T. a. gracilirostris* (Hartert, E, 1905), has been described based on  
101 its morphological traits, especially for its smaller size and darker coloration (Bannerman 1963;  
102 Clements et al. 2019). This subspecies is recorded in the eastern Canary Islands of Lanzarote  
103 and Fuerteventura, as well as in its surrounding islets (Lobos, Alegranza, Montaña Clara and La  
104 Graciosa), and is the only barn owl in this sector of the archipelago (Siverio 2007).

105 The presence of this subspecies on the eastern islands is surprising however, given that it is  
106 sandwiched between the western islands and the mainland which both harbour the nominal  
107 species *T. alba*. Lacking any evidence of different colonization origins or timing, this could  
108 suggest that selection to local conditions acting on the eastern population has accelerated  
109 divergence in comparison to the western one. In both cases, neutral and adaptive  
110 microevolutionary processes promoting divergence of insular populations would leave traces on  
111 their genomic makeup. The advances in sequencing technology, and its decreasing costs, now  
112 allow to sequence the entire genomes of individuals. With the parallel development of  
113 sophisticated tools, it is possible to analyse changes in allelic frequencies at a high resolution to

114 investigate the history of populations and inspect the genomic landscape for signals of local  
115 adaptation.

116 Here, we investigate the genomic bases of differentiation of barn owls from the Canary Islands.  
117 Making use of the whole-genome sequences from 40 individuals, we first describe the neutral  
118 genetic structure and diversity of the Canaries populations in contrast to the mainland, in order  
119 to retrace their history. Second, we employ a new relatedness-based method to probe the  
120 genomic landscape of these isolated populations for signals of local adaptation to the insular  
121 environment in regards to the mainland. Third, we characterize the climatic niches barn owls  
122 occupy on eastern and western islands, and explore how each population is diverging to adapt  
123 to their niches from a genomic perspective. Our results elucidate the genomic bases of the  
124 differentiation of insular populations, thus enlightening the classification of the Canaries barn  
125 owls.

126

## 127 **Materials & Methods**

### 128 **Whole-genome sequencing, SNP calling and identification of coding regions**

129 For this study, 40 individual barn owls were sampled from four populations (Figure 1;  
130 Supplementary Table 1): Eastern Canaries (EC, Fuerteventura and Lanzarote), Western Canary  
131 (WC, Tenerife), Morocco (MA), Portugal (PT) and Israel (IS). All but the EC and MA populations  
132 were published in previous work, including a North American owl that was used as an outgroup  
133 for some analyses (Genbank accession JAEUGV000000000 (Cumer et al. 2021; Machado et al.  
134 2021). For EC and MA, we followed the same molecular and sequencing protocol as in the  
135 aforementioned publications. Succinctly, genomic DNA was extracted using the DNeasy Blood &  
136 Tissue kit (Qiagen, Hilden, Germany) and individually tagged 100bp TruSeq DNA PCR-free  
137 libraries (Illumina) were prepared according to manufacturer's instructions. Whole-genome  
138 resequencing was performed on multiplexed libraries with Illumina HiSeq 2500 high-throughput  
139 paired-end sequencing technologies at the Lausanne Genomic Technologies Facility (GTF,  
140 University of Lausanne, Switzerland).

141 The bioinformatics pipeline used to obtain analysis-ready SNPs from the 40 individuals plus the  
142 outgroup was the same as in (Machado et al. 2021), adapted from the Genome Analysis Toolkit  
143 (GATK) Best Practices (van der Auwera et al. 2013) to a non-model organism following the  
144 developers' recommendations. Briefly, reads were trimmed with Trimomatic v.0.36 (Bolger et  
145 al. 2014) and aligned with BWA-MEM v.0.7.15 (Li and Durbin 2009) to the barn owl reference  
146 genome (GenBank accession JAEUGV000000000; Machado et al. 2021). Base quality score  
147 recalibration (BQSR) was performed in GATK v.4.1.3 using high-confidence calls obtained from  
148 two independent callers: GATK's HaplotypeCaller and GenotypeGVCF v.4.1.3 and ANGSD v.0.921  
149 (Korneliussen et al. 2014). Following BQSR, variants were called with GATK's HaplotypeCaller  
150 and GenotypeGVCFs v.4.1.3 from the recalibrated bam files. Genotype calls were filtered using  
151 GATK and VCFtools (Danecek et al. 2011) if they presented: low individual quality per depth (QD  
152 < 5), extreme coverage (600 > DP > 1000), mapping quality (MQ < 40 and MQ > 70), extreme

153 hetero or homozygosity ( $\text{ExcessHet} > 20$  and  $\text{InbreedingCoeff} > 0.9$ ) and high read strand bias  
154 ( $\text{FS} > 60$  and  $\text{SOR} > 3$ ). We filtered further at the level of individual genotype for low quality (GQ  
155  $< 20$ ) and extreme coverage ( $\text{GenDP} < 10$  and  $\text{GenDP} > 40$ ). Lastly, we kept only bi-allelic sites  
156 with less than 5% of missing data across individuals resulting in 7'283'516 SNP. For analyses of  
157 neutral population structure and demography, an exact Hardy-Weinberg test was used to  
158 remove sites that significantly departed ( $p < 0.05$ ) from the expected equilibrium using the R (R  
159 Development Core Team 2016) package HardyWeinberg (Graffelman and Morales-Camarena  
160 2008; Graffelman 2015) yielding 6'827'220 SNP with a mean coverage of 19.9X (4.6 SD).

161

## 162 **Population structure and genetic diversity**

163 To investigate population structure among our samples, sNMF v.1.2 (Frichot et al. 2014) was run  
164 for K 2 to 5 in 25 replicates to infer individual clustering and admixture proportions. For this  
165 analysis, singletons were excluded and the remaining SNPs were pruned for linkage  
166 disequilibrium in PLINK v1.946 (Purcell et al., 2007; parameters -indep-pairwise 50 10 0.1) as  
167 recommended by the authors, retaining 288'775 SNP. The same dataset was used to perform a  
168 Principal Component Analysis (PCA) with the R package SNPRelate (Zheng et al. 2012). A  
169 second PCA was performed by merging the data in this study with that of (Cumer et al. 2021)  
170 that includes European populations (total of 2'036'320 SNP with no missing data) to assess  
171 where the Eastern Canary population (unsampled in Cumer et al. 2021) falls among the larger  
172 sampling.

173 Individual observed heterozygosity and population-specific private alleles were estimated using  
174 custom R scripts for each population. Individual-based relatedness ( $\beta$ ; (Weir and Goudet 2017;  
175 Goudet et al. 2018), inbreeding coefficients for whole genome SNP data ( $F_{IS}$  and  $F_{IT}$ ), overall,  
176 population specific and pairwise  $F_{ST}$  (Weir and Goudet 2017) were calculated with hierfstat v.0.5-  
177 9 (Goudet 2005).

178

179 **Demographic history**

180 To investigate the demographic history of the insular populations and potential admixture  
181 events we used Treemix (Pickrell and Pritchard 2012). Using the LD-pruned dataset filtered  
182 further to include no missing data (228'980 SNP), Treemix was run for 10 replicates with 0 to 5  
183 migration events, rooting the tree on the IS population, given its position on the PCA and what is  
184 known of the region from previous work (Cumer et al. 2021). The function `get_f` was used to  
185 estimate the variance explained by adding migration events.

186

187 **Detection of genomic regions under selection**

188 *Insular vs mainland barn owls*

189 In this study, we aimed to identify genomic regions potentially under selection at two different  
190 levels. First, to detect signatures of selection specific to barn owls of the Canary Islands, we  
191 grouped insular individuals (EC and WC) and compared them to the mainland ones (MA, PT and  
192 IS). A script by Simon Martin  
193 ([https://github.com/simonhmartin/genomics\\_general/blob/master/popgenWindows.py](https://github.com/simonhmartin/genomics_general/blob/master/popgenWindows.py)) was  
194 used to estimate genome wide patterns of relative ( $F_{ST}^{LvsML}$ ) and absolute ( $d_{xy}$ ) divergence  
195 between the insular and mainland groups, and to calculate nucleotide diversity ( $\pi$ ) per group, in  
196 windows of 100kbp with 20kbp steps.

197 `SNPrelate` was used to calculate a pairwise matrix of linkage disequilibrium ( $r$ ) from SNPs with  
198 over 5% minor allelic frequency (MAF) over all insular individuals (EC and WC) on one hand and  
199 all mainland individuals (PT, MA and IS) in the other, which was then squared to obtain  $r^2$ . For  
200 plotting, we estimated the mean of non-overlapping 100 SNP windows.

201 The topology weighting method implemented in `Twisst` (Martin and Van Belleghem 2017), was  
202 used to quantify the relationships between the five populations in our dataset and visualize how  
203 they change along the genome. `Twisst` estimated the topology based on trees produced using  
204 `Randomized Axelerated Maximum Likelihood (RAxML) v8.2.12` (Stamatakis 2014). `RAxML`

205 inferred trees in sliding windows (100kb of length, 20kb of slide) using a generalized time-  
206 reversible (GTR) CAT model with Lewis ascertainment bias correction. Twisst then estimated the  
207 weighting of each taxon topology (defined as the fraction of all unique population sub-trees) per  
208 window.

209 Finally, we calculated population specific  $F_{ST}$  from allele sharing matrices ( $\beta$ ; (Weir and Goudet  
210 2017; Goudet et al. 2018) in sliding windows of 100kbp with 20kbp steps, using hierfstat. For  
211 each matrix, we calculated i) the mean allele sharing for pairs of individuals from islands and ii)  
212 the mean allele sharing for pairs of individuals, one from an island and the other from the  
213 mainland, from which we obtain the islands specific  $F_{ST}$ . We shall refer to this estimate as  $F_{ST}$   
214 island-specific ( $F_{ST}^{can}$ ; see Sup. Fig. 1 for a schematic representation). This method allowed us to  
215 identify genomic regions of high differentiation exclusively on the islands with no confounding  
216 effect from the mainland (see also Weir et al. 2005).

217 From the genome wide scans, we identified peaks of differentiation with at least two  
218 overlapping windows of  $F_{ST}^{can}$  higher than 5 standard deviations (SD) from the mean (threshold:  
219 0.377), and extracted the genes in these regions from the NCBI's annotation of the reference  
220 genome (RefSeq accession: GCF\_018691265.1). The gene list was then fed to ShinyGO v0.61  
221 (Ge et al. 2020) to investigate potential enrichment of molecular pathways.

222

### 223 *Eastern vs Western Canary Islands*

224 On a second stage, to investigate potential genomic signals of differentiation, putatively linked  
225 with ecological adaptation to their distinct niches, we contrasted the two insular lineages (EC  
226 against WC). We estimated pairwise  $F_{ST}$ ,  $d_{xy}$  and  $\pi$  as for the island-mainland comparison  
227 described above.

228 Then, as for the island-mainland comparison above, we used hierfstat to calculate population  
229 specific  $F_{ST}$  in sliding windows of 100kbp with 20kbp steps based on a dataset including only  
230 the insular individuals. For each island, we consequently identified genomic regions with at least

231 two overlapping windows of pairwise  $F_{ST}$  higher than 5 SD from the mean (regions highly  
232 differentiated between islands, threshold: 0.157) and above the 99<sup>th</sup> quantile of each  
233 population's  $F$  (regions highly similar within each island, respective threshold for  $F_{ST}^{EC}$ = 0.404  
234 and for  $F_{ST}^{WC}$ =0.393) and extracted the genes in these regions as described above. This yielded  
235 two genes lists, one per island, which were input to ShinyGO as above.

236

### 237 **Climatic niche analysis**

238 To assess whether the barn owl populations of eastern and western Canaries occupy different  
239 climatic niches, we used the Outlying Mean Index (OMI) approach (Dolédec et al. 2000) as  
240 implemented in the R package *ade4* v.1.7-16. Observation points for barn owls were compiled  
241 from three different sources: Global Biodiversity Information Facility (GBIF), samples sequenced  
242 in this study and in Burri et al. (2016). We kept records only from the islands sampled in this  
243 study, namely Tenerife (*T. alba*; N=79) and Lanzarote and Fuerteventura (*T. a. gracillirostris*;  
244 N=34 and N=39, respectively).

245 Climatic variables for the Canary Islands were extracted from the WorldClim database (Hijmans  
246 et al. 2005) at 30 sec resolution (approximately 1 km<sup>2</sup>) using the R package *rbioclim* (Exposito-  
247 Alonso 2017). Redundant variables (correlation of 1) were trimmed and the final model was run  
248 with the following 13 variables: Mean Diurnal Range (BIO2), Isothermality (BIO3), Temperature  
249 Seasonality (BIO4), Max Temperature of Warmest Month (BIO5), Min Temperature of Coldest  
250 Month (BIO6), Temperature Annual Range (BIO7), Mean Temperature of Driest Quarter (BIO9),  
251 Annual Precipitation (BIO12), Precipitation of Driest Month (BIO14), Precipitation Seasonality  
252 (BIO15), Precipitation of Warmest Quarter (BIO18), Precipitation of Coldest Quarter (BIO19).

253

## 254 **Results**

### 255 **Population structure and genetic diversity**

256 The overall  $F_{ST}$  in our dataset was 0.0698. Individual ancestry analyses with sNMF distinguished  
257 four genetic clusters, separating each population into its own cluster, except Morocco (MA) and  
258 Portugal (PT) that clustered together (Fig. 1a). Similarly, PCA clustering clearly grouped  
259 individuals according to their population, except PT and MA (Fig. 1c). The first axis opposed the  
260 insular populations to the mainland, as did sNMF  $K=2$  (Sup. Fig. 2), with Eastern Canary (EC) and  
261 Israel (IS) at each extreme. The second axis contrasted the two insular populations EC and  
262 Western Canary (WC), as in  $K=3$  (Sup. Fig. 2), and finally the third axis segregated the mainland  
263 groups with PT and MA opposed to IS, as in  $K=4$  (Fig. 1a, 1c). Three individuals from EC (one  
264 from Fuerteventura and two from Lanzarote) showed small ancestry levels from both WC and PT  
265 in sNMF and were placed intermediately on axes 1 and 2 of the PCA. In the PCA including the  
266 European individuals, the first axis remained qualitatively the same with EC and WC together in  
267 opposition to IS (Sup. Fig. 3). Axes 2 and 3 switched positions, with MA, PT and the rest of  
268 Europe being first isolated from the rest and only then the two Canary split from each other  
269 (Sup. Fig. 3). In terms of differentiation, pairwise  $F_{ST}$  were highest between both islands and IS  
270 (EC-IS 0.092; WC-IS 0.088) as well as between islands (WC-EC 0.084). The mainland  
271 populations were overall less differentiated (all below 0.04), with PT and MA having the lowest  
272  $F_{ST}$  with all other populations in accordance with their central position on the PCA (all below  
273 0.06 for PT and 0.061 for MA), and the lowest between themselves (0.007) (Table 1).

274 Treemix yielded a population tree highly resembling the first PCA axis, with two main branches  
275 splitting from the IS root, one towards PT and MA and the second to WC and EC (Sup. Fig. 4).  
276 Most of the variance was explained by the tree with no migration (0.993). Nonetheless, the tree  
277 with two migration events displayed the highest likelihood (162.284), with one migration edge  
278 from the base of WC towards the tip of PT (edge weight 0.33) and the other from the base of PT

279 towards the tip of EC (edge weight 0.13). Adding more than two migration events to the tree did  
280 not improve its fit to the data.

281 Overall, mainland populations presented higher genetic diversity than the insular ones (Table 1).  
282 Nonetheless, both insular populations showed over 280'000 private polymorphic sites (Table 1).  
283 Accordingly, individual relatedness was higher within and between insular populations (Sup. Fig.  
284 5), and PT had the lowest within population relatedness. All populations showed signs of  
285 random mating with  $F_{IS}$  close to zero but slightly negative as expected of dioecious species  
286 (Balloux 2004), while the inbreeding levels of insular barn owls relative to the whole set of  
287 populations ( $F_{IT}$ ) were higher than those on the mainland (Table 1), a reflection of their isolation  
288 from the continent.

289

#### 290 **Island vs mainland genomic comparisons**

291 In order to measure the differentiation between islands and mainland individuals, we computed  
292 two distinct  $F_{ST}$  along the genome (see methods for details).  $F_{ST}^{Can}$  allowed the detection of  
293 regions of high similarity in the islands as a whole, whereas  $F_{ST}^{LvsML}$  produced less clear results  
294 with population-specific allelic frequencies driving the overall signal instead of the defined  
295 groups. For example,  $F_{ST}^{LvsML}$  yielded a peak of differentiation between the islands and the  
296 mainland which, upon closer inspection of pairwise comparisons of the populations, turned out  
297 to be due to differences between EC and the mainland only, whereas WC did not produce the  
298 same signal (Sup. Fig. 6). The genomic comparisons of diversity and divergence between insular  
299 and mainland barn owls based on the  $F_{ST}^{Can}$  yielded 48 regions (4 78 100kb overlapping  
300 windows) of high differentiation including 100 genes (Fig. 2a). ShinyGO analyses identified an  
301 enrichment of five functional categories related to morphogenesis in humans (Sup. Table 2). The  
302 largest enriched pathway – anatomical structure morphogenesis – included 25 of the genes in  
303 regions of high genomic differentiation. The remaining three categories – anatomical structure  
304 formation involved in morphogenesis, tube morphogenesis and blood vessel morphogenesis –  
305 were subsets of the largest pathway, including 15, 14, 12 and 10 of the 25 genes, respectively.

306 The largest of the peaks encompassed 15Mb of Super-Scaffold\_1000006. Of all the genes  
307 found in peaks of differentiation, 87 out of 100 were within this region. Here, insular owls  
308 showed a strong decrease in relative diversity compared to the mainland ( $F_{ST}^{Can}$ ), as well as a  
309 drop of absolute divergence ( $d_{xy}$ ) between each other and nucleotide diversity ( $\pi$ ). The region  
310 showed strong LD ( $r^2$ ) in all insular owls between neighbouring variants compared to the rest of  
311 the scaffold (Fig. 2b), which was not the case among continental ones (Sup. Fig. 7). In addition,  
312  $F_{ST}$  was higher between island and mainland owls (Sup Fig. 6). Twisst showed roughly similar  
313 proportions of each tree along the genome, except for this region where there was a higher than  
314 average proportion of trees that joined EC and WC (Sup. Fig. 8). Of the 25 genes of the  
315 morphogenesis pathway, 18 were found in this closely-linked region of  
316 Super\_Scaffold\_1000006 (21% of the total 87 genes of the region).

317

## 318 **Eastern vs Western Canary Islands**

### 319 *Climatic niche analysis*

320 To investigate the genomic and ecological differentiation between island populations (EC and  
321 WC), we first depict different climate in the two set of islands based on barn owl observations in  
322 the Canary Islands. The climatic niche analyses (OMI) yielded two axes that explained the  
323 climatic variability in our study area (Fig. 3b), with the first axis (OMI1) explaining nearly all of it  
324 (99.3%). OMI1 was positively correlated with temperature and negatively correlated with  
325 precipitation (Sup. Fig. 10). The eastern population *T. a. gracilirostris* occupied a narrow niche of  
326 high temperature, low precipitation and low seasonal and daily variability. *Tyto alba* in Tenerife  
327 occupied a broader niche that covered most of OMI1, including some of the niche of *T. a.*  
328 *gracilirostris*. OMI2 explained little of the variability (0.7%), spreading slightly each population's  
329 niche without segregating them.

330

### 331 *Detection of differentially selected genomic regions*

332 We then searched for regions under selection in each island, yielding to a total of 33 putatively  
333 adaptive regions (14 in EC and 19 in WC), with high differentiation ( $F_{ST}$ ) between island and  
334 increased relatedness within each island ( $F_{ST}^{EC}$  and  $F_{ST}^{WC}$ ), from which we obtained two lists of  
335 genes (Fig. 3c, 3d). For EC, there were 30 such genes (Sup. Table 3) while for WC there were 25  
336 genes (Sup. Table 4). Enrichment analyses found no link to a specific GO pathway for either  
337 island population. Nonetheless, in each island there were clusters of genes with similar  
338 identified functions, namely body proportions and blood pressure in EC, and cellular response to  
339 hypoxia in WC.

## 340 **Discussion**

341 Islands offer unique conditions for organisms to adapt and expand their niches. In the Canaries,  
342 an archipelago rich in endemics, the barn owl is one of the few raptors present and is thought to  
343 have diverged into a subspecies on the easternmost islands. Taking advantage of whole-  
344 genome sequences, we first investigate the origin of the population of barn owls in the Canary  
345 Islands, revealing that the latter are long-standing populations and allowing us to address their  
346 taxonomic classification. Using a new, more sensitive method based on excess of allele sharing  
347 within the islands, we detect 58 putatively locally adapted genomic segments, many of them  
348 grouped in a haplotype-like region seemingly under positive selection in the Canary Islands. A  
349 quarter of the tightly linked genes in this genomic region are enriched for genes contributing to  
350 a pathway of anatomical morphogenesis suggesting morphological adaptations to insularity. We  
351 also identify scattered genomic regions putatively locally adapted to either the eastern and  
352 western islands. For eastern Canaries, the identified genes in regions under positive selection  
353 belong to pathways linked to body proportions and blood pressure, consistent with the smaller  
354 owl size of this population living in a hot arid climate. In the western Canaries, barn owls from  
355 Tenerife display a potential signal of selection of genes related to hypoxia, a potential response  
356 to inhabiting an island with a steep elevation gradient.

357

### 358 **Barn owls from the Canary Islands and Mediterranean Basin**

359 Our work shows that, while each population in the study area has its own unique genetic  
360 composition (Fig. 1), barn owls from the Canary Islands are distinct from those on the mainland  
361 surrounding the Mediterranean Basin. Indeed, clustering methods constantly opposed insular  
362 individuals to mainland ones (Fig. 1c; Sup. Fig. 2) and were supported by the drift-based trees of  
363 Treemix. Thus, overall, our current results indicate that the two insular lineages – Eastern and  
364 Western Canaries – have a common origin.

365 In terms of genetic diversity, the islands were less diverse than the mainland as expected and  
366 showed slightly higher levels of inbreeding relative to the whole set (Frankham 1997). However,  
367 they presented nearly 10-fold higher levels of private alleles than those reported for other  
368 islands in the Atlantic (British Isles; Machado et al. 2021) and in the Mediterranean Sea (Cyprus  
369 and Greek islands; Machado et al. 2021). Notably, the two Canaries insular populations, about  
370 165 km apart, were more distant genetically from each other than either was from Portugal,  
371 over 1000 km away. Furthermore, they were more distant from each other even than WC was  
372 from any population in continental Europe in a recent genomic study (Cumer et al. 2021), as  
373 well as in an earlier one with microsatellites (Burri et al. 2016). The high private diversity could  
374 be partially explained by the small number of samples in north-western Africa, which may be  
375 masking any shared polymorphisms between the islands and the nearest mainland as private to  
376 the former. However, as we did sample PT and IS, the most diverse populations in the Western  
377 Palearctic assumed to meet in northern Africa (Cumer et al. 2021), much of this insular diversity  
378 is likely indeed private. Therefore, the Canaries appear to have been colonized much earlier than  
379 the other studied insular populations and have thus had the time for *in situ* mutations to  
380 accumulate in spite of genetic drift, which is supported by their higher divergence as well. These  
381 populations may also reflect a more ancient lineage from northern Africa that would have been  
382 replaced or simply evolved in a different direction and only the addition of samples from African  
383 mainland (on top of the three MA samples) would allow to fully depict the neutral history of  
384 these populations.

385

### 386 **Insularity**

387 We found multiple evidence of adaptation common to both barn owl lineages of the Canary  
388 Islands. To do so, we used an estimator of population specific  $F_{ST}$  (Weir and Goudet 2017;  
389 Goudet et al. 2018) to identify genomic regions with an excess of shared ancestry in all insular  
390 individuals relatively to the mean shared ancestry between islands and mainland individuals.  
391 Being a moment estimator, it can process efficiently a large amount of genomic loci, compared

392 to maximum likelihood or Bayesian estimators (e.g. Foll and Gaggiotti 2008). More importantly,  
393 it does not rely on the F-model, which assumes independent populations. This island specific  $F_{ST}$   
394 ( $F_{ST}^{Can}$ ) identified regions of increased relatedness between insular individuals compared to the  
395 averaged relatedness along the genome (i.e. regions in which all insular individuals resemble  
396 each other more than expected). This population specific, moment based and model-free  
397 estimator of  $F_{ST}$  provides a clearer result than classical pairwise  $F_{ST}$  scan, as it focuses on the  
398 diversity in the target population rather than taking an average over the set of populations, and  
399 should be a useful addition to the population genomic toolbox to detect nested signals of local  
400 adaptation, especially when there is substructure in the groups one wishes to compare. We thus  
401 considered regions highly similar in insular individuals as putatively under selection on the  
402 islands. The genomic landscape of  $F_{ST}^{Can}$  differentiation between insular and mainland owls  
403 yielded 58 windows putatively under selection (Fig. 2a). Among these, a particularly large and  
404 clear peak of differentiation stood out. This region approximately 15 Mb in length was highly  
405 similar among insular individuals (Sup. Fig. 9) as shown by the accompanying drop in  $d_{XY}$  and  $\pi$   
406 (Fig. 2b). Furthermore, the increased linkage between alleles in this region suggests that it is  
407 transmitted in a haplotype-fashion. Crucially, the fact that we do not see the slightest surge of  
408 LD in mainland individuals confirms that it is not a by-product of a region of low-recombination  
409 in this species (Sup. Fig. 7). Overall, we provide strong evidence of positive selection in this  
410 genomic region in Canary Islands owls, suggesting an adaptation to insularity (Fig. 2).

411 A fifth of the genes in this haplotype (18 out of 87), in conjunction with 7 other genes in  
412 potentially adaptative regions, significantly enriched the anatomical structure morphogenesis  
413 pathway (Sup. Table 2), a biological process related to the organisation and generation of  
414 anatomical structure during development. This suggests positive selection on some  
415 morphological trait on insular individuals. Given that there is evidence of gene flow from the  
416 mainland into both islands (see admixed individuals in Fig. 1, Sup Fig, S2), we propose two  
417 hypotheses to explain how selection might act on this haplotype. First, it could confer a  
418 significant advantage to individuals carrying it on the island and prevent those that do not carry  
419 it from reproducing or surviving. In this scenario, immigrants from the mainland not carrying this

420 haplotype would reproduce less in both islands. In the second scenario, selection would happen  
421 on the migrants themselves before reaching the island if, for example, the haplotype facilitates  
422 long flight over large spans of water. It is widely accepted that, given how dispersal capacity is  
423 highly variable across species, even among birds, some are more prone to colonizing islands  
424 than others. Therefore, it is also conceivable that, within a species or population, some  
425 individuals are morphologically more predisposed or have better dispersal abilities than others.  
426 Since the barn owl generally avoids flying over open water, as demonstrated by its consistently  
427 higher differentiation on islands (Cumer et al. 2021; Machado et al. 2021, n.d.), this seems  
428 plausible. The absence of phenotypic measurements from the sequenced birds prevents us from  
429 establishing a link between phenotypes and genotypes on this data set, and we hence remain  
430 cautious on the speculation regarding the functional implications of this haplotype. Future work  
431 should verify the frequencies of this haplotype in a larger cohort as we only had 19 insular  
432 individuals in this study and, if possible, include detailed morphometric measurements to allow  
433 a GWAS-like approach.

434

### 435 **Ecological divergence**

436 In the Canary archipelago, both the eastern islands and Tenerife have many specific endemic  
437 species across multiple taxa. This is generally attributed to their intrinsic characteristics driving  
438 ecological speciation, namely the arid and windy conditions of Lanzarote and Fuerteventura, and  
439 the elevation gradient of the Teide volcano (up to 3'718m a.s.l.) in Tenerife. We quantified the  
440 climatic differences between the two environments with a niche analysis based on reported  
441 barn owl observations, and show that indeed barn owls occupy significantly different niches on  
442 each group of islands (Fig. 3b). In the east, they are found on unvaryingly hot and dry locations,  
443 whereas Tenerife covers a wide range of temperature and precipitation (Fig. 3b).

444 From the genomic data, we found evidence of local adaptation on both insular populations (Fig.  
445 3c, 3d). The eastern population had more genomic regions, and more genes, potentially under  
446 selection compared to the west (30 and 25 genes, respectively). Although no significant

447 pathway enrichment was detected in either population, there were clear groups of genes with  
448 similar known functions in the putatively adapted regions. In the eastern population there were  
449 two such groups. The first, composed of 7 genes, has significant links to body size and  
450 proportions in humans (see Sup. Table 3 and references therein). Among these, a specific set of  
451 4 genes – *HIP1R*, *CCDC62*, *VPS37B* and *ABCB9* – is tightly clustered in the barn owl genome  
452 (Fig. 3c). These four genes have been linked to body height, body-mass-index and other body  
453 measurement ratios (Turcot et al. 2018; Kichaev et al. 2019; Vuckovic et al. 2020; Zhu et al.  
454 2020), and may thus play a role in the smaller size of barn owls in the eastern population, which  
455 would then be adaptive. The second group of genes in regions potentially under selection,  
456 includes 11 genes related to numerous blood parameters (Sup. Table 3), a similar signal to that  
457 seen in chickens adapted to hot arid environments (Gu et al. 2020). In particular, the gene  
458 *MTHFR* has extensive connections to blood pressure (Newton-Cheh et al. 2009; Ehret et al.  
459 2016; Liu et al. 2016; Surendran et al. 2016; Hoffmann et al. 2017; Wain et al. 2017; Kulminski  
460 et al. 2018; German et al. 2020), a trait known to vary with environmental temperature in  
461 mammals (Halonen et al. 2011) and birds (Darre and Harrison 1987), potentially suggesting  
462 barn owls have circulatory systems adapted to the hot and dry conditions of the eastern  
463 Canaries.

464 In the western island population, regions putatively under selection contained an interesting  
465 group of 4 genes - *EPAS1*, *PRKCE*, *MCFD2* and *FZD8* - with links to red blood cells, haemoglobin  
466 density and cellular response to hypoxia (i.e. low levels of oxygen; Sup. Table 4; Astle et al.  
467 2016; Kichaev et al. 2019; Chen et al. 2020; Oskarsson et al. 2020; Vuckovic et al. 2020). Red  
468 blood cells, and the haemoglobin within, are responsible for transporting oxygen in the body and  
469 are direct targets of selection at high elevation (O'Brien et al. 2020). The gene *EPAS1* in  
470 particular, is well known for being involved in adaptation to high altitude environments across  
471 vertebrates (Witt and Huerta-Sánchez 2019). These genes hints at a possible adaptation of barn  
472 owls to higher altitude in Tenerife. On this small island, barn owls are mostly concentrated at  
473 lower altitude (i.e. along the coast – 0 to 300m a.s.l.) and their repartition is limited in the  
474 central part of the island due to the presence of the high mountains at about 2000m a.s.l., that

475 culminates with the colossal peak of Teide at 3715m a.s.l. (Siverio 1998). This is consistent with  
476 the known limited ability of this bird to live at high altitudes (Machado et al. 2018; Cumer et al.  
477 2021). However, the observation of individuals up to 1200m a.s.l. and the presence of breeding  
478 couples at moderate altitudes (600 to 1200m a.s.l., Siverio 1998), support the hypothesis of an  
479 ongoing adaptation to higher altitude in this insular population. This hypothesis, which deserves  
480 further investigations, is also consistent with observations made in other populations in warm  
481 climates; where local barn owl populations expand their range by adapting to slightly higher  
482 altitudes (Romano et al. 2020).

483 Considering its wide distribution, even accounting for phenotypic plasticity, barn owls' capacity  
484 to adapt to a variety of prey and environments is unquestionable. As such, detecting signals of  
485 local adaption in the Canary Islands is not surprising. Indeed, with islands generally being  
486 species-poor, the species that do inhabit them have to adapt to different or broader niches via  
487 ecological divergence (Losos and Ricklefs 2009). This is especially true of volcanic islands that  
488 arise isolated and uninhabited, in contrast to those intermittently connected to the mainland  
489 and more easily colonized. Moreover, the community of birds of prey in the Canary archipelago  
490 includes less than half the species found in the nearby mainland (8 diurnal and 2 nocturnal  
491 species; Martín and Lorenzo, 2001; Rodríguez et al. 2018), likely due to the lack of suitable  
492 habitat, preys and/or the limited surface. A by-product of this is the reduction of inter-specific  
493 competition, which could have allowed the barn owl to maintain population sizes just large  
494 enough on the islands through time for selection to act and potentially expand its niche to better  
495 exploit the insular environment. Our results suggest this is happening in parallel on each island  
496 (Fig. 3c, 3d), consistent with their different niches (Fig. 3b) and relative genetic isolation,  
497 producing two distinct ecomorphs, adapted to distinct ecosystems.

498

#### 499 **Insular subspecies**

500 The eastern islands of Lanzarote and Fuerteventura, and adjacent islets (Fig. 3a) are home to  
501 the barn owl subspecies *T. a. gracilirostris*. This classification is based on its smaller size and

502 even on colouration pattern, although the latter is contested by ornithologists and inconsistent  
503 with reported phenotypical measurements (Burri et al. 2016). The reduction in size is actually a  
504 common pattern in insular barn owls (Romano et al. 2021), and could be an adaptation to  
505 nesting in very small cavities (i.e. cracks in lava walls) and/or to better navigate the strong  
506 winds in the eastern islands (Siverio 2007). The genomic data presented here is consistent with  
507 this population forming an endemic subspecies. It has diverged considerably from the mainland,  
508 with higher differentiation levels than barn owls from any other studied island in the Western  
509 Palearctic (Machado et al. 2021, n.d.). Moreover, we show it carries high levels of private genetic  
510 diversity and multiple genomic regions showing signs of local adaptation (Fig. 3c).

511 In contrast, barn owls from Tenerife and the remaining islands are considered to belong to the  
512 nominal *T. alba* found also on the mainland surrounding the Mediterranean Basin (Fig. 3a).  
513 However, it too has considerably diverged from the mainland and shows signs of potential  
514 ongoing adaptation in Tenerife and its elevation gradient (see previous section). Furthermore, it  
515 clusters with the other insular Canary population rather than the mainland (Fig. 1). While it is  
516 not the aim of this study to evaluate what constitutes a subspecies, we provide evidence that  
517 the Tenerife population is diverging significantly from its founding population, both neutrally and  
518 adaptively, albeit at a slower pace than the eastern population.

519 The reasons why the eastern population is more divergent than the western, a puzzling fact  
520 considering it is closer to the mainland, are not yet fully resolved. Neutral divergence in  $F_{ST}$   
521 between these two insular populations suggest they are the result of two independent  
522 colonisation events rather than a strict east-to-west progression as described for other taxa  
523 (Juan et al. 2000). Although the islands themselves emerged from east to west, Tenerife is at  
524 least 11 million years old, twice the inferred time of formation of the *T. alba* species (Uva et al.  
525 2018) and thus available for colonisation at the time. Nonetheless, an earlier settlement of the  
526 eastern islands would have given more time for both genetic drift and selection to promote  
527 divergence. Alternatively, a very small population size in the east, consistent with current census  
528 data (Palacios 2004; Siverio 2007), could account for the stronger drift in a scenario of

529 simultaneous colonization. However, it would strongly hinder local adaptation, making it a less  
530 likely hypothesis since we identified more regions putatively under selection in this population.  
531 Further work, including an extensive sampling of all island populations, as well as demographic  
532 modelling, would be needed to resolve this intriguing pattern and refine the history of the barn  
533 owl in the Canary archipelago.

534

## 535 **Conclusion**

536 Due to their intrinsic characteristics, islands house numerous endemics making them ideal  
537 systems to study the bases of ecological divergence. We provide empirical evidence that both  
538 neutral and adaptive evolutionary mechanisms shaped divergence from the mainland in barn  
539 owls from the Canary archipelago. Our results show clear signs of genome-wide differentiation  
540 (i.e. neutral), a combination of mutations (high private diversity; Table 1) and drift (high  $F_{ST}$  and  
541  $F_{IT}$ ), consistent with theoretical expectations for populations established and isolated long ago  
542 despite some admixture. We also identify signals of local adaptation to common insular  
543 conditions (Fig. 2), as well as to each island's niche, creating ecomorphs (Fig. 3). While the  
544 history and functional effect of the putatively adapted genomic regions identified here deserve  
545 further investigation, these observations highlight how selection can still act on small isolated  
546 populations. This study illustrates the capacity of a widespread bird to adapt to the local  
547 ecological conditions of small islands, an adaptative capacity which may prove essential in  
548 facing a changing global climate.

549

## 550 **Acknowledgements**

551 **We are grateful to the following institutions and individuals that provided samples or aided in**  
552 **sampling to our study: Karim Rousselon, Gustavo Tejera, Sylvain Antoniazza, Reto Burri, Aurelio**  
553 **Martín, David P. Padilla, the "Association Marocaine pour la Protection des Rapaces AMPR", the**  
554 **Natural History Museum of Tenerife and the Wildlife Rehabilitation Centre La Tahonilla (Cabildo**  
555 **Insular de Tenerife). We thank Céline Simon and Guillaume Dumont for their valuable**  
556 **assistance with molecular work. The Gobierno de Canarias provided all the corresponding**  
557 **permits for the collection and inter-island transport of samples. This study was funded by the**  
558 **Swiss National Science Foundation with grants 31003A-138180 & 31003A\_179358 to JG and**  
559 **31003A\_173178 to AR.**

560

## 561 **Data Accessibility**

562 **The raw Illumina reads for the whole-genome sequenced individuals are available in BioProjects**  
563 **PRJNA700797, PRJNA727977 and PRJNA774943. Sampling locations used for niche**  
564 **modelling are given in appendix 1.**

565

## 566 **Author Contributions**

567 **APM, TC, AR, JG designed this study; FS, MC, IR, RL provided samples; APM produced whole-**  
568 **genome resequencing libraries; TC and APM conducted the analyses; APM and TC led the**  
569 **writing of the manuscript with input from all authors.**

570

571

## 572 **References**

- 573 [dataset] Cumer, T., A. P. Machado, G. Dumont, V. A. Bontzorlos, R. Ceccherelli, M. Charter, K.  
574 Dichmann, H.-D. Martens, N. Kassinis, R. Lourenço, F. Manzia, K. Ovari, L. Prévost, M.  
575 Rakovic, F. Siverio, A. Roulin, and J. Goudet; 2021; Population genomics of barn owls in the  
576 Western Palearctic; NCBI bio project PRJNA727977;  
577 <https://doi.org/10.1093/molbev/msab343>
- 578 [dataset] Machado, A. P., T. Cumer, C. Iseli, E. Beaudoin, M. Dupasquier, N. Guex, K. Dichmann,  
579 R. Lourenço, J. Lusby, H.-D. Martens, L. Prévost, D. Ramsden, A. Roulin, and J. Goudet;  
580 2021; Population genomics of barn owls in the British Isles; NCBI bio project  
581 PRJNA700797; <https://doi.org/10.1111/mec.16250>
- 582 Anguita, F., and F. Hernán. 2000. The Canary Islands origin: A unifying model. *J. Volcanol.*  
583 *Geotherm. Res.* 103:1–26. Elsevier B.V.
- 584 Astle, W. J., H. Elding, T. Jiang, D. Allen, D. Ruklisa, A. L. Mann, D. Mead, H. Bouman, F. Riveros-  
585 McKay, M. A. Kostadima, J. J. Lambourne, S. Sivapalaratnam, K. Downes, K. Kundu, L.  
586 Bomba, K. Berentsen, J. R. Bradley, L. C. Daugherty, O. Delaneau, K. Freson, S. F. Garner, L.  
587 Grassi, J. Guerrero, M. Haimel, E. M. Janssen-Megens, A. Kaan, M. Kamat, B. Kim, A.  
588 Mandoli, J. Marchini, J. H. A. Martens, S. Meacham, K. Megy, J. O’Connell, R. Petersen, N.  
589 Sharifi, S. M. Sheard, J. R. Staley, S. Tuna, M. van der Ent, K. Walter, S. Y. Wang, E. Wheeler,  
590 S. P. Wilder, V. Iotchkova, C. Moore, J. Sambrook, H. G. Stunnenberg, E. Di Angelantonio, S.  
591 Kaptoge, T. W. Kuijpers, E. Carrillo-de-Santa-Pau, D. Juan, D. Rico, A. Valencia, L. Chen, B.  
592 Ge, L. Vasquez, T. Kwan, D. Garrido-Martín, S. Watt, Y. Yang, R. Guigo, S. Beck, D. S. Paul, T.  
593 Pastinen, D. Bujold, G. Bourque, M. Frontini, J. Danesh, D. J. Roberts, W. H. Ouwehand, A. S.  
594 Butterworth, and N. Soranzo. 2016. The Allelic Landscape of Human Blood Cell Trait  
595 Variation and Links to Common Complex Disease. *Cell* 167:1415-1429.e19. Cell Press.
- 596 Balloux, F. 2004. Heterozygote excess in small populations and the heterozygote-excess  
597 effective population size. *Evolution (N. Y.)* 58:1891–1900. Society for the Study of  
598 Evolution.
- 599 Bannerman, D. A. 1963. *Birds of the Atlantic Islands. Vol. 1. A history of the birds of the Canary*  
600 *Islands and of the Salvages.* Oliver & Boyd.
- 601 Bolger, A. M., M. Lohse, and B. Usadel. 2014. Trimmomatic: A flexible trimmer for Illumina  
602 sequence data. *Bioinformatics* 30:2114–2120. Oxford University Press.
- 603 Burri, R., S. Antoniazza, A. Gagher, A.-L. Ducrest, C. Simon, L. Fumagalli, J. Goudet, and A.  
604 Roulin. 2016. The genetic basis of color-related local adaptation in a ring-like colonization  
605 around the Mediterranean. *Evolution (N. Y.)* 70:140–153.
- 606 Carine, M. A., C. J. Humphries, I. R. Guma, J. A. Reyes-Betancort, and A. Santos Guerra. 2009.  
607 Areas and algorithms: Evaluating numerical approaches for the delimitation of areas of  
608 endemism in the Canary Islands archipelago. *J. Biogeogr.* 36:593–611.
- 609 Chen, M. H., L. M. Raffield, A. Mousas, S. Sakaue, J. E. Huffman, A. Moscati, B. Trivedi, T. Jiang, P.  
610 Akbari, D. Vuckovic, E. L. Bao, X. Zhong, R. Manansala, V. Laplante, M. Chen, K. S. Lo, H.  
611 Qian, C. A. Lareau, M. Beaudoin, K. A. Hunt, M. Akiyama, T. M. Bartz, Y. Ben-Shlomo, A.  
612 Beswick, J. Bork-Jensen, E. P. Bottinger, J. A. Brody, F. J. van Rooij, K. Chitrala, K. Cho, H.  
613 Choquet, A. Correa, J. Danesh, E. Di Angelantonio, N. Dimou, J. Ding, P. Elliott, T. Esko, M. K.  
614 Evans, J. S. Floyd, L. Broer, N. Grarup, M. H. Guo, A. Greinacher, J. Haessler, T. Hansen, J. M.  
615 Howson, Q. Q. Huang, W. Huang, E. Jorgenson, T. Kacprowski, M. Kähönen, Y. Kamatani, M.  
616 Kanai, S. Karthikeyan, F. Koskeridis, L. A. Lange, T. Lehtimäki, M. M. Lerch, A. Linneberg, Y.  
617 Liu, L. P. Lyytikäinen, A. Manichaikul, H. C. Martin, K. Matsuda, K. L. Mohlke, N. Mononen, Y.  
618 Murakami, G. N. Nadkarni, M. Nauck, K. Nikus, W. H. Ouwehand, N. Pankratz, O. Pedersen,  
619 M. Preuss, B. M. Psaty, O. T. Raitakari, D. J. Roberts, S. S. Rich, B. A. T. Rodriguez, J. D.

- 620 Rosen, J. I. Rotter, P. Schubert, C. N. Spracklen, P. Surendran, H. Tang, J. C. Tardif, R. C.  
621 Trembath, M. Ghanbari, U. Völker, H. Völzke, N. A. Watkins, A. B. Zonderman, P. W. F.  
622 Wilson, Y. Li, A. S. Butterworth, J. F. Gauchat, C. W. K. Chiang, B. Li, R. J. F. Loos, W. J. Astle,  
623 E. Evangelou, D. A. van Heel, V. G. Sankaran, Y. Okada, N. Soranzo, A. D. Johnson, A. P.  
624 Reiner, P. L. Auer, and G. Lettre. 2020. Trans-ethnic and Ancestry-Specific Blood-Cell  
625 Genetics in 746,667 Individuals from 5 Global Populations. *Cell* **182**:1198-1213.e14.
- 626 Clements, J. F., T. S. Schulenberg, M. J. Iliff, S. M. Billerman, T. A. Fredericks, B. L. Sullivan, and C.  
627 L. Wood. 2019. The eBird/Clements Checklist of Birds of the World: v2019.
- 628 Cumer, T., A. P. Machado, G. Dumont, V. A. Bontzorlos, R. Ceccherelli, M. Charter, K. Dichmann,  
629 H.-D. Martens, N. Kassinis, R. Lourenço, F. Manzia, K. Ovari, L. Prévost, M. Rakovic, F.  
630 Siverio, A. Roulin, and J. Goudet. 2021. Landscape and climatic variations of the  
631 Quaternary shaped multiple secondary contacts among barn owls (*Tyto alba*) of the  
632 Western Palearctic. *Molecular Biology and Evolution*, msab343,  
633 <https://doi.org/10.1093/molbev/msab343>.
- 634 Danecek, P., A. Auton, G. Abecasis, C. A. Albers, E. Banks, M. A. DePristo, R. E. Handsaker, G.  
635 Lunter, G. T. Marth, S. T. Sherry, G. McVean, and R. Durbin. 2011. The variant call format  
636 and VCFtools. *Bioinformatics* **27**:2156–2158.
- 637 Darre, M. J., and P. C. Harrison. 1987. Heart rate, blood pressure, cardiac output, and total  
638 peripheral resistance of single comb White Leghorn hens during an acute exposure to 35 C  
639 ambient temperature. *Poult. Sci.* **66**:541–547.
- 640 Dolédec, S., D. Chessel, and C. Gimaret-Carpentier. 2000. Niche separation in community  
641 analysis: A new method. *Ecology* **81**:2914–2927. John Wiley & Sons, Ltd.
- 642 Ducrest, A.-L., S. Neuenschwander, E. Schmid-Siegert, M. Pagni, C. Train, D. Dylus, Y. Nevers, A.  
643 Warwick Vesztrocy, L. M. San-Jose, M. Dupasquier, C. Dessimoz, I. Xenarios, A. Roulin, and  
644 J. Goudet. 2020. New genome assembly of the barn owl (*Tyto alba alba*). *Ecol. Evol.*  
645 **10**:2284–2298. John Wiley and Sons Ltd.
- 646 Ehret, G. B., T. Ferreira, D. I. Chasman, A. U. Jackson, E. M. Schmidt, T. Johnson, G. Thorleifsson,  
647 J. Luan, L. A. Donnelly, S. Kanoni, A. K. Petersen, V. Pihur, R. J. Strawbridge, D. Shungin, M.  
648 F. Hughes, O. Meirelles, M. Kaakinen, N. Bouatia-Naji, K. Kristiansson, S. Shah, M. E. Kleber,  
649 X. Guo, L. P. Lytykäinen, C. Fava, N. Eriksson, I. M. Nolte, P. K. Magnusson, E. L. Salfati, L.  
650 S. Rallidis, E. Theusch, A. J. P. Smith, L. Folkersen, K. Witkowska, T. H. Pers, R. Joehanes, S.  
651 K. Kim, L. Lataniotis, R. Jansen, A. D. Johnson, H. Warren, Y. J. Kim, W. Zhao, Y. Wu, B. O.  
652 Tayo, M. Bochud, D. Absher, L. S. Adair, N. Amin, D. E. Arking, T. Axelsson, D. Baldassarre,  
653 B. Balkau, S. Bandinelli, M. R. Barnes, I. Barroso, S. Bevan, J. C. Bis, G. Bjornsdottir, M.  
654 Boehnke, E. Boerwinkle, L. L. Bonnycastle, D. I. Boomsma, S. R. Bornstein, M. J. Brown, M.  
655 Burnier, C. P. Cabrera, J. C. Chambers, I. S. Chang, C. Y. Cheng, P. S. Chines, R. H. Chung, F.  
656 S. Collins, J. M. Connell, A. Döring, J. Dallongeville, J. Danesh, U. De Faire, G. Delgado, A. F.  
657 Dominiczak, A. S. F. Doney, F. Drenos, S. Edkins, J. D. Eicher, R. Elosua, S. Enroth, J.  
658 Erdmann, P. Eriksson, T. Esko, E. Evangelou, A. Evans, T. Fall, M. Farrall, J. F. Felix, J.  
659 Ferrières, L. Ferrucci, M. Fornage, T. Forrester, N. Franceschini, O. H. Franco, A. Franco-  
660 Cereceda, R. M. Fraser, S. K. Ganesh, H. Gao, K. Gertow, F. Gianfagna, B. Gigante, F.  
661 Giulianini, A. Goel, A. H. Goodall, M. O. Goodarzi, M. Gorski, J. Gräßler, C. J. Groves, V.  
662 Gudnason, U. Gyllensten, G. Hallmans, A. L. Hartikainen, M. Hassinen, A. S. Havulinna, C.  
663 Hayward, S. Hercberg, K. H. Herzig, A. A. Hicks, A. D. Hingorani, J. N. Hirschhorn, A. Hofman,  
664 J. Holmen, O. L. Holmen, J. J. Hottenga, P. Howard, C. A. Hsiung, S. C. Hunt, M. A. Ikram, T.  
665 Illig, C. Iribarren, R. A. Jensen, M. Kähönen, H. M. Kang, S. Kathiresan, B. J. Keating, K. T.  
666 Khaw, Y. K. Kim, E. Kim, M. Kivimaki, N. Klopp, G. Kolovou, P. Komulainen, J. S. Kooner, G.  
667 Kosova, R. M. Krauss, D. Kuh, Z. Kutalik, J. Kuusisto, K. Kvaløy, T. A. Lakka, N. R. Lee, I. Te  
668 Lee, W. J. Lee, D. Levy, X. Li, K. W. Liang, H. Lin, L. Lin, J. Lindström, S. Lobbens, S.  
669 Männistö, G. Müller, M. Müller-Nurasyid, F. Mach, H. S. Markus, E. Marouli, M. I. McCarthy,  
670 C. A. McKenzie, P. Meneton, C. Menni, A. Metspalu, V. Mijatovic, L. Moilanen, M. E.

- 671 Montasser, A. D. Morris, A. C. Morrison, A. Mulas, R. Nagaraja, N. Narisu, K. Nikus, C. J.  
672 O'Donnell, P. F. O'Reilly, K. K. Ong, F. Paccaud, C. D. Palmer, A. Parsa, N. L. Pedersen, B. W.  
673 Penninx, M. Perola, A. Peters, N. Poulter, P. P. Pramstaller, B. M. Psaty, T. Quertermous, D.  
674 C. Rao, A. Rasheed, N. W. Rayner, F. Renström, R. Rettig, K. M. Rice, R. Roberts, L. M. Rose,  
675 J. Rossouw, N. J. Samani, S. Sanna, J. Saramies, H. Schunkert, S. Sebert, W. H. H. Sheu, Y.  
676 A. Shin, X. Sim, J. H. Smit, A. V. Smith, M. X. Sosa, T. D. Spector, A. Stančáková, A. V.  
677 Stanton, K. E. Stirrups, H. M. Stringham, J. Sundstrom, A. J. Swift, A. C. Syvänen, E. S. Tai, T.  
678 Tanaka, K. V. Tarasov, A. Teumer, U. Thorsteinsdottir, M. D. Tobin, E. Tremoli, A. G.  
679 Uitterlinden, M. Uusitupa, A. Vaez, D. Vaidya, C. M. Van Duijn, E. P. A. Van Iperen, R. S.  
680 Vasán, G. C. Verwoert, J. Virtamo, V. Vitart, B. F. Voight, P. Vollenweider, A. Wagner, L. V.  
681 Wain, N. J. Wareham, H. Watkins, A. B. Weder, H. J. Westra, R. Wilks, T. Wilsgaard, J. F.  
682 Wilson, T. Y. Wong, T. P. Yang, J. Yao, L. Yengo, W. Zhang, J. H. Zhao, X. Zhu, P. Bovet, R. S.  
683 Cooper, K. L. Mohlke, D. Saleheen, J. Y. Lee, P. Elliott, H. J. Gierman, C. J. Willer, L. Franke,  
684 G. K. Hovingh, K. D. Taylor, G. Dedoussis, P. Sever, A. Wong, L. Lind, T. L. Assimes, I.  
685 Njølstad, P. E. H. Schwarz, C. Langenberg, H. Snieder, M. J. Caulfield, O. Melander, M.  
686 Laakso, J. Saltevo, R. Rauramaa, J. Tuomilehto, E. Ingelsson, T. Lehtimäki, K. Hveem, W.  
687 Palmas, W. März, M. Kumari, V. Salomaa, Y. D. I. Chen, J. I. Rotter, P. Froguel, M. R.  
688 Jarvelin, E. G. Lakatta, K. Kuulasmaa, P. W. Franks, A. Hamsten, H. E. Wichmann, C. N. A.  
689 Palmer, K. Stefansson, P. M. Ridker, R. J. F. Loos, A. Chakravarti, P. Deloukas, A. P. Morris,  
690 C. Newton-Cheh, and P. B. Munroe. 2016. The genetics of blood pressure regulation and its  
691 target organs from association studies in 342,415 individuals. *Nat. Genet.* **48**:1171–1184.  
692 Nature Publishing Group.
- 693 Exposito-Alonso, M. 2017. rbioclim: Improved getData function from the raster R package to  
694 interact with past, present and future climate data from worldclim.org.
- 695 Firmat, C., H. Gomes Rodrigues, S. Renaud, J. Claude, R. Hutterer, F. Garcia-Talavera, and J.  
696 Michaux. 2010. Mandible morphology, dental microwear, and diet of the extinct giant rats  
697 *Canariomys* (Rodentia: Murinae) of the Canary Islands (Spain). *Biol. J. Linn. Soc.* **101**:28–  
698 40. Blackwell Publishing Ltd.
- 699 Foll, M., and O. Gaggiotti. 2008. A genome-scan method to identify selected loci appropriate for  
700 both dominant and codominant markers: A Bayesian perspective. *Genetics* **180**:977–993.  
701 Oxford Academic.
- 702 Frankham, R. 1997. Do island populations have less genetic variation than mainland  
703 populations? *Heredity (Edinb.)* **78**:311–327.
- 704 Frichot, E., F. Mathieu, T. Trouillon, G. Bouchard, and O. François. 2014. Fast and efficient  
705 estimation of individual ancestry coefficients. *Genetics* **196**:973–983.
- 706 GBIF.org (8 February 2021) GBIF Occurrence Download <https://doi.org/10.15468/dl.5pd26s>
- 707 Ge, S. X., D. Jung, D. Jung, and R. Yao. 2020. ShinyGO: A graphical gene-set enrichment tool for  
708 animals and plants. *Bioinformatics* **36**:2628–2629. Oxford University Press.
- 709 German, C. A., J. S. Sinsheimer, Y. C. Klimentidis, H. Zhou, and J. J. Zhou. 2020. Ordered  
710 multinomial regression for genetic association analysis of ordinal phenotypes at Biobank  
711 scale. *Genet. Epidemiol.* **44**:248–260. Wiley-Liss Inc.
- 712 Gillespie, R. 2004. Community assembly through adaptive radiation in Hawaiian spiders.  
713 *Science (80-. )*. **303**:356–359.
- 714 Gillespie, R., H. Croom, and G. Hasty. 1997. Phylogenetic Relationships and Adaptive Shifts  
715 among Major Clades of Tetragnatha Spiders (Araneae: Tetragnathidae) in Hawai'i. *Pacific*  
716 *Sci.* **51**:380–394.
- 717 Goudet, J. 2005. HIERFSTAT, a package for R to compute and test hierarchical F -statistics. *Mol.*  
718 *Ecol. Notes* **5**:184–186.

- 719 Goudet, J., T. Kay, and B. S. Weir. 2018. How to estimate kinship. *Mol. Ecol.* 27:4121–4135.  
720 Blackwell Publishing Ltd.
- 721 Graffelman, J. 2015. Exploring Diallelic Genetic Markers: The {HardyWeinberg} Package. *J. Stat.*  
722 *Softw.* 64:1–23.
- 723 Graffelman, J., and J. Morales-Camarena. 2008. Graphical tests for Hardy-Weinberg Equilibrium  
724 based on the ternary plot. *Hum. Hered.* 65:77–84.
- 725 Grant, P. R. 1999. *Ecology and Evolution of Darwin's Finches*. Princeton University Press.
- 726 Grant, P. R. 1998. *Evolution on Islands*. Oxford University Press, Oxford, UK.
- 727 Gu, J., Q. Liang, C. Liu, and S. Li. 2020. Genomic Analyses Reveal Adaptation to Hot Arid and  
728 Harsh Environments in Native Chickens of China. *Front. Genet.* 11:582355.
- 729 Halonen, J. I., A. Zanobetti, D. Sparrow, P. S. Vokonas, and J. Schwartz. 2011. Relationship  
730 between outdoor temperature and blood pressure. *Occup. Environ. Med.* 68:296–301.
- 731 Hijmans, R. J., S. E. Cameron, J. L. Parra, P. G. Jones, and A. Jarvis. 2005. Very high resolution  
732 interpolated climate surfaces for global land areas. *Int. J. Climatol.* 25:1965–1978. John  
733 Wiley & Sons, Ltd.
- 734 Hoffmann, T. J., G. B. Ehret, P. Nandakumar, D. Ranatunga, C. Schaefer, P. Y. Kwok, C. Iribarren,  
735 A. Chakravarti, and N. Risch. 2017. Genome-wide association analyses using electronic  
736 health records identify new loci influencing blood pressure variation. *Nat. Genet.* 49:54–64.
- 737 Hutterer, R., L. F. Lopez-Jurado, and P. Vogel. 1987. The shrews of the eastern Canary Islands: A  
738 new species (mammalia: Soricidae). *J. Nat. Hist.* 21:1347–1357.
- 739 Illera, J. C., L. G. Spurgin, E. Rodriguez-Exposito, M. Nogales, and J. C. Rando. 2016. What are we  
740 learning about speciation and extinction from the Canary Islands?. *Ardeola* 63:15-33.
- 741 Juan, C., B. C. Emerson, P. Oromí, and G. M. Hewitt. 2000. Colonization and diversification:  
742 Towards a phylogeographic synthesis for the Canary Islands. Elsevier Ltd.
- 743 Keller, L. F., and D. M. Waller. 2002. Inbreeding effects in wild populations. *Trends Ecol. Evol.*  
744 17:230–241.
- 745 Kichaev, G., G. Bhatia, P. R. Loh, S. Gazal, K. Burch, M. K. Freund, A. Schoech, B. Pasaniuc, and  
746 A. L. Price. 2019. Leveraging Polygenic Functional Enrichment to Improve GWAS Power.  
747 *Am. J. Hum. Genet.* 104:65–75. Cell Press.
- 748 Korneliussen, T. S., A. Albrechtsen, and R. Nielsen. 2014. ANGSD: Analysis of Next Generation  
749 Sequencing Data. *BMC Bioinformatics* 15:1–13. BioMed Central Ltd.
- 750 Kulminski, A. M., J. Huang, Y. Loika, K. G. Arbeev, O. Bagley, A. Yashkin, M. Duan, and I.  
751 Culminkaya. 2018. Strong impact of natural-selection-free heterogeneity in genetics of  
752 age-related phenotypes. *Aging (Albany, NY)*. 10:492–514. Impact Journals LLC.
- 753 Lamichhaney, S., J. Berglund, M. S. Almén, K. Maqbool, M. Grabherr, A. Martinez-Barrio, M.  
754 Promerová, C. J. Rubin, C. Wang, N. Zamani, B. R. Grant, P. R. Grant, M. T. Webster, and L.  
755 Andersson. 2015. Evolution of Darwin's finches and their beaks revealed by genome  
756 sequencing. *Nature* 518:371–375.
- 757 Leathlobhair, M. N., A. R. Perri, E. K. Irving-Pease, K. E. Witt, A. Linderholm, J. Haile, O.  
758 Lebrasseur, C. Ameen, J. Blick, A. R. Boyko, S. Brace, Y. N. Cortes, S. J. Crockford, A.  
759 Devault, E. A. Dimopoulos, M. Eldridge, J. Enk, S. Gopalakrishnan, K. Gori, V. Grimes, E.  
760 Guiry, A. J. Hansen, A. Hulme-Beaman, J. Johnson, A. Kitchen, A. K. Kasparov, Y. M. Kwon,  
761 P. A. Nikolskiy, C. P. Lope, A. Manin, T. Martin, M. Meyer, K. N. Myers, M. Omura, J. M.  
762 Rouillard, E. Y. Pavlova, P. Sciulli, M. H. S. Sinding, A. Strakova, V. V. Ivanova, C. Widga, E.  
763 Willerslev, V. V. Pitulko, I. Barnes, M. T. P. Gilbert, K. M. Dobney, R. S. Malhi, E. P.

- 764 Murchison, G. Larson, and L. A. F. Frantz. 2018. The evolutionary history of dogs in the  
765 Americas. *Science* (80- ). 361:81–85. American Association for the Advancement of  
766 Science.
- 767 Lenormand, T. 2002. Gene flow and the limits to natural selection. *Trends Ecol. Evol.* 17:183–  
768 189. Elsevier Ltd.
- 769 Li, H. 2018. Minimap2: Pairwise alignment for nucleotide sequences. *Bioinformatics* 34:3094–  
770 3100. Oxford University Press.
- 771 Li, H., and R. Durbin. 2009. Fast and accurate short read alignment with Burrows-Wheeler  
772 transform. *Bioinformatics* 25:1754–1760. Oxford University Press.
- 773 Lifjeld, J. T., J. A. Anmarkrud, P. Calabuig, J. E. J. Cooper, L. E. Johannessen, A. Johnsen, A. M.  
774 Kearns, R. F. Lachlan, T. Laskemoen, G. Marthinsen, E. Stensrud, and E. García-Del-Rey.  
775 2016. Species-level divergences in multiple functional traits between the two endemic  
776 subspecies of Blue Chaffinches *Fringilla teydea* in Canary Islands. *BMC Zool.* 1:1–19.  
777 BioMed Central Ltd.
- 778 Liu, C., A. T. Kraja, J. A. Smith, J. A. Brody, N. Franceschini, J. C. Bis, K. Rice, A. C. Morrison, Y. Lu,  
779 S. Weiss, X. Guo, W. Palmas, L. W. Martin, Y. D. I. Chen, P. Surendran, F. Drenos, J. P. Cook,  
780 P. L. Auer, A. Y. Chu, A. Giri, W. Zhao, J. Jakobsdottir, L. A. Lin, J. M. Stafford, N. Amin, H.  
781 Mei, J. Yao, A. Voorman, M. G. Larson, M. L. Grove, A. V. Smith, S. J. Hwang, H. Chen, T.  
782 Huan, G. Kosova, N. O. Stitzel, S. Kathiresan, N. Samani, H. Schunkert, P. Deloukas, M. Li,  
783 C. Fuchsberger, C. Pattaro, M. Gorski, C. Kooperberg, G. J. Papanicolaou, J. E. Rossouw, J. D.  
784 Faul, S. L. R. Kardina, C. Bouchard, L. J. Raffel, A. G. Uitterlinden, O. H. Franco, R. S. Vasani, C.  
785 J. O'Donnell, K. D. Taylor, K. Liu, E. P. Bottinger, O. Gottesman, E. W. Daw, F. Giulianini, S.  
786 Ganesh, E. Salfati, T. B. Harris, L. J. Launer, M. Dörr, S. B. Felix, R. Rettig, H. Völzke, E. Kim,  
787 W. J. Lee, I. Te Lee, W. H. H. Sheu, K. S. Tsosie, D. R. V. Edwards, Y. Liu, A. Correa, D. R.  
788 Weir, U. Völker, P. M. Ridker, E. Boerwinkle, V. Gudnason, A. P. Reiner, C. M. Van Duijn, I. B.  
789 Borecki, T. L. Edwards, A. Chakravarti, J. I. Rotter, B. M. Psaty, R. J. F. Loos, M. Fornage, G.  
790 B. Ehret, C. Newton-Cheh, D. Levy, and D. I. Chasman. 2016. Meta-analysis identifies  
791 common and rare variants influencing blood pressure and overlapping with metabolic trait  
792 loci. *Nat. Genet.* 48:1162–1170.
- 793 Liu, L., M. Bosse, H. J. Megens, L. A. F. Frantz, Y. L. Lee, E. K. Irving-Pease, G. Narayan, M. A. M.  
794 Groenen, and O. Madsen. 2019. Genomic analysis on pygmy hog reveals extensive  
795 interbreeding during wild boar expansion. *Nat. Commun.* 10:1–9. Nature Publishing Group.
- 796 Losos, J. B., T. R. Jackman, A. Larson, K. De Queiroz, and L. Rodríguez-Schettino. 1998.  
797 Contingency and determinism in replicated adaptive radiations of island lizards. *Science*  
798 (80- ). 279:2115–2118.
- 799 Losos, J. B., and R. E. Ricklefs. 2009. Adaptation and diversification on islands. *Nature*  
800 457:830–6. Nature Publishing Group.
- 801 MacArthur, R. H., and E. O. Wilson. 1963. An Equilibrium Theory of Insular Zoogeography.  
802 *Evolution* (N. Y). 17:373–387.
- 803 MacArthur, R. H., and E. O. Wilson. 1967. The theory of island biogeography. Princeton University  
804 Press.
- 805 Machado, A. P., L. Clément, V. Uva, J. Goudet, and A. Roulin. 2018. The Rocky Mountains as a  
806 dispersal barrier between barn owl (*Tyto alba*) populations in North America. *J. Biogeogr.*  
807 1288–1300.
- 808 Machado, A. P., T. Cumer, C. Iseli, E. Beaudouin, M. Dupasquier, N. Guex, K. Dichmann, R.  
809 Lourenço, J. Lusby, H.-D. Martens, L. Prévost, D. Ramsden, A. Roulin, and J. Goudet. 2021.  
810 Unexpected post-glacial colonisation route explains the white colour of barn owls (*Tyto*  
811 *alba*) from the British Isles. *Molecular Ecology*, 00, 1– 16.

- 812 <https://doi.org/10.1111/mec.16250>.
- 813 Machado, A. P., A. Topaloudis, T. Cumer, E. Lavanchy, V. A. Bontzorlos, R. Ceccherelli, M. Charter,  
814 N. Kassinis, P. Lymberakis, F. Manzia, A.-L. Ducrest, M. Dupasquier, N. Guex, A. Roulin, and  
815 J. Goudet. n.d. Genomic consequences of colonisation, migration and genetic drift in barn  
816 owl insular populations of the eastern Mediterranean. prep.
- 817 Malinsky, M., R. J. Challis, A. M. Tyers, S. Schiffels, Y. Terai, B. P. Ngatunga, E. A. Miska, R.  
818 Durbin, M. J. Genner, and G. F. Turner. 2015. Genomic islands of speciation separate cichlid  
819 ecomorphs in an East African crater lake. *Science* (80-. ). 350:1493–1498.
- 820 Martín, A., and J. A. Lorenzo. 2001. *Aves del archipiélago canario*. Francisco Lemus, Editor.
- 821 Martin, S. H., and S. M. Van Belleghem. 2017. Exploring evolutionary relationships across the  
822 genome using topology weighting. *Genetics* 206:429–438. Genetics Society of America.
- 823 Masseti, M. 2010. Mammals of the Macaronesian islands (the Azores, Madeira, the Canary and  
824 Cape Verde islands): redefinition of the ecological equilibrium. *Mammalia* 74:3–34.
- 825 Mateo, J. A., P. A. Crochet, and O. M. Afonso. 2011. The species diversity of the genus *Gallotia*  
826 (Sauria: Lacertidae) during the Holocene on La Gomera (Canary Islands) and the Latin  
827 names of Gomeran giant lizards. *Zootaxa* 2755:66-68.
- 828 Molina-Borja, M. 2003. Sexual dimorphism of *Gallotia atlantica atlantica* and *Gallotia atlantica*  
829 *mahoratae* (Lacertidae) from the Eastern Canary Islands. *J. Herpetol.* 37: 769–772.
- 830 Newton-Cheh, C., T. Johnson, V. Gateva, M. D. Tobin, M. Bochud, L. Coin, S. S. Najjar, J. H. Zhao,  
831 S. C. Heath, S. Eyheramendy, K. Papadakis, B. F. Voight, L. J. Scott, F. Zhang, M. Farrall, T.  
832 Tanaka, C. Wallace, J. C. Chambers, K. T. Khaw, P. Nilsson, P. Van Der Harst, S. Polidoro, D.  
833 E. Grobbee, N. C. Onland-Moret, M. L. Bots, L. V. Wain, K. S. Elliot, A. Teumer, J. Luan, G.  
834 Lucas, J. Kuusisto, P. R. Burton, D. Hadley, W. L. McArdle, M. Brown, A. Dominiczak, S. J.  
835 Newhouse, N. J. Samani, J. Webster, E. Zeggini, J. S. Beckmann, S. Bergmann, N. Lim, K.  
836 Song, P. Vollenweider, G. Waeber, D. M. Waterworth, X. Yuan, L. Groop, M. Orho-Melander,  
837 A. Allione, A. Di Gregorio, S. Guarrera, S. Panico, F. Ricceri, V. Romanazzi, C. Sacerdote, P.  
838 Vineis, I. Barroso, M. S. Sandhu, R. N. Luben, G. J. Crawford, P. Jousilahti, M. Perola, M.  
839 Boehnke, L. L. Bonnycastle, F. S. Collins, A. U. Jackson, K. L. Mohlke, H. M. Stringham, T. T.  
840 Valle, C. J. Willer, R. N. Bergman, M. A. Morken, A. Döring, C. Gieger, T. Illig, T. Meitinger, E.  
841 Org, A. Pfeufer, H. E. Wichmann, S. Kathiresan, J. Marrugat, C. J. O'Donnell, S. M. Schwartz,  
842 D. S. Siscovick, I. Subirana, N. B. Freimer, A. L. Hartikainen, M. I. McCarthy, P. F. O'Reilly, L.  
843 Peltonen, A. Pouta, P. E. De Jong, H. Snieder, W. H. Van Gilst, R. Clarke, A. Goel, A.  
844 Hamsten, D. Altshuler, M. R. Jarvelin, P. Elliott, E. G. Lakatta, N. Forouhi, N. J. Wareham, R.  
845 J. F. Loos, P. Deloukas, G. M. Lathrop, D. Zelenika, D. P. Strachan, N. Soranzo, F. M.  
846 Williams, G. Zhai, T. D. Spector, J. F. Peden, H. Watkins, L. Ferrucci, M. Caulfield, P. B.  
847 Munroe, G. Berglund, O. Melander, G. Matullo, C. S. Uiterwaal, Y. T. van der Schouw, M. E.  
848 Numans, F. Ernst, G. Homuth, U. Völker, R. Elosua, M. Laakso, J. M. Connell, V. Mooser, V.  
849 Salomaa, J. Tuomilehto, M. Laan, G. Navis, U. Seedorf, A. C. Syvänen, G. Tognoni, S. Sanna,  
850 M. Uda, P. Scheet, D. Schlessinger, A. Scuteri, M. Dörr, S. B. Felix, T. Reffelmann, R. Lorbeer,  
851 H. Völzke, R. Rettig, P. Galan, S. Hercberg, S. A. Bingham, J. S. Kooner, S. Bandinelli, P.  
852 Meneton, G. Abecasis, J. R. Thompson, C. A. Braga Marcano, B. Barke, R. Dobson, J.  
853 Gungadoo, K. L. Lee, A. Onipinla, I. Wallace, M. Xue, D. G. Clayton, H. T. Leung, S. Nutland,  
854 N. M. Walker, J. A. Todd, H. E. Stevens, D. B. Dunger, B. Widmer, K. Downes, L. R. Cardon, D.  
855 P. Kwiatkowski, J. C. Barrett, D. Evans, A. P. Morris, C. M. Lindgren, N. W. Rayner, N. J.  
856 Timpson, E. Lyons, F. Vannberg, A. V. S. Hill, Y. Y. Teo, K. A. Rockett, N. Craddock, A. P.  
857 Attwood, C. Bryan, S. J. Bumpstead, A. Chaney, J. Ghorri, R. G. William, S. E. Hunt, M. Inouye,  
858 E. Keniry, E. King, R. McGinnis, S. Potter, R. Ravindrarajan, P. Whittaker, D. Withers, D.  
859 Bentley, C. J. Groves, A. Duncanson, W. H. Ouwehand, J. P. Boorman, B. Cant, J. D. Jolley, A.  
860 S. Knight, K. Koch, N. C. Taylor, N. A. Watkins, T. Winzer, P. S. Braund, R. J. Dixon, M.  
861 Mangino, S. Stevens, P. Donnelly, D. Davidson, J. L. Marchini, I. C. A. Spencer, N. J. Cardin, T.

- 862 Ferreira, J. Pereira-Gale, I. B. Hallgrimsdottir, B. N. Howie, Z. Su, D. Vukcevic, D. Easton, U.  
863 Everson, J. M. Hussey, E. Meech, C. V. Prowse, G. R. Walters, R. W. Jones, S. M. Ring, M.  
864 Prembey, G. Breen, D. St. Clair, S. Ceasar, K. Gordon-Smith, C. Fraser, E. K. Green, D.  
865 Grozeva, M. L. Hamshere, P. A. Holmans, I. R. Jones, G. Kirov, V. Moskovina, I. Nikolov, M. C.  
866 O'Donovan, M. J. Owen, N. Craddock, D. A. Collier, A. Elkin, A. Farmer, R. Williamson, P.  
867 McGruffin, A. H. Young, I. N. Ferrier, S. G. Ball, A. J. Balmforth, J. H. Barrett, D. T. Bishop, M.  
868 M. Iles, A. Maqbool, N. Yuldasheva, A. S. Hall, F. Bredin, M. Tremelling, M. Parkes, H.  
869 Drummond, C. W. Lees, E. R. Nimmo, J. Satsangi, S. A. Fisher, C. M. Lewis, C. M. Onnie, N. J.  
870 Prescott, C. G. Mathew, A. Forbes, J. Sanderson, C. Mathew, J. Barbour, M. K. Mohiuddin, C.  
871 E. Todhunter, J. C. Mansfield, T. Ahmad, F. R. Cummings, D. P. Jewell, A. Barton, I. N. Bruce,  
872 H. Donovan, S. Eyre, P. D. Gilbert, S. L. Hider, A. M. Hinks, S. L. John, C. Potter, A. J. Silman,  
873 D. P. M. Symmons, W. Thomson, J. Worthington, T. M. Frayling, R. M. Freathy, H. Lango, J. R.  
874 B. Perry, M. N. Weedon, A. T. Hattersley, B. M. Shields, G. A. Hitman, M. Walker, M. Newport,  
875 G. Sirugo, D. Conway, M. Jallow, L. A. Bradbury, J. L. Pointon, M. A. Brown, C. Farrar, P.  
876 Wordsworth, J. A. Franklyn, J. M. Heward, M. J. Simmonds, S. C. L. Cough, S. Seal, M. R.  
877 Stratton, M. Ban, A. Goris, S. J. Sawcer, and A. Compston. 2009. Genome-wide association  
878 study identifies eight loci associated with blood pressure. *Nat. Genet.* 41:666–676.
- 879 Nogales, M., L. De León, and R. Gómez. 1998. On the presence of the endemic skink *Chalcides*  
880 *simonyi* Steind. 1891 in Lanzarote (Canary Islands). *Amphibia-Reptilia* 19:427–430.
- 881 Nogales, M., Rando, J.C., Valido, A. and Martín, A., 2001. Discovery of a living giant lizard, genus  
882 *Gallotia* (Reptilia: Lacertidae), from La Gomera, Canary Islands. *Herpetologica* 57:169-179.
- 883 Norder, S. J., K. Proios, R. J. Whittaker, M. R. Alonso, P. A. V. Borges, M. K. Borregaard, R. H.  
884 Cowie, F. B. V. Florens, A. M. de Frias Martins, M. Ibáñez, W. D. Kissling, L. de Nascimento,  
885 R. Otto, C. E. Parent, F. Rigal, B. H. Warren, J. M. Fernández-Palacios, E. E. van Loon, K. A.  
886 Triantis, and K. F. Rijdsdijk. 2019. Beyond the Last Glacial Maximum: Island endemism is  
887 best explained by long-lasting archipelago configurations. *Glob. Ecol. Biogeogr.* 28:184–  
888 197. Blackwell Publishing Ltd.
- 889 O'Brien, K. A., T. S. Simonson, and A. J. Murray. 2020. *Metabolic adaptation to high altitude.*  
890 Elsevier Ltd.
- 891 Oskarsson, G. R., A. Oddsson, M. K. Magnusson, R. P. Kristjansson, G. H. Halldorsson, E.  
892 Ferkingstad, F. Zink, A. Helgadóttir, E. V. Ivarsdóttir, G. A. Arnadóttir, B. O. Jansson, H.  
893 Katrinardóttir, G. Sveinbjörnsson, A. M. Kristinsdóttir, A. L. Lee, J. Saemundsdóttir, L.  
894 Stefansdóttir, J. K. Sigurdsson, O. B. Davidsson, S. Benonisdóttir, A. Jonasdóttir, A.  
895 Jonasdóttir, S. Jonsson, R. L. Gudmundsson, F. W. Asselbergs, V. Tragante, B. Gunnarsson,  
896 G. Masson, G. Thorleifsson, T. Rafnar, H. Holm, I. Olafsson, P. T. Onundarson, D. F.  
897 Gudbjartsson, G. L. Norddahl, U. Thorsteinsdóttir, P. Sulem, and K. Stefansson. 2020.  
898 Predicted loss and gain of function mutations in *ACO1* are associated with erythropoiesis.  
899 *Commun. Biol.* 3:1–10. Nature Research.
- 900 Palacios, C. J. 2004. Current status and distribution of birds of prey in the Canary Islands. *Bird*  
901 *Conserv. Int.* 14:203–213.
- 902 Pestano, J., R. P. Brown, N. M. Suárez, J. Benzal, and S. Fajardo. 2003. Intraspecific evolution of  
903 Canary Island Plecotine bats, based on mtDNA sequences. *Heredity (Edinb).* 90:302–307.  
904 Nature Publishing Group.
- 905 Pickrell, J., and J. Pritchard. 2012. Inference of population splits and mixtures from genome-  
906 wide allele frequency data. *Nat. Preced.*, doi: 10.1038/npre.2012.6956.1. Springer  
907 Science and Business Media LLC.
- 908 Purcell, S., B. Neale, K. Todd-Brown, L. Thomas, M. A. R. Ferreira, D. Bender, J. Maller, P. Sklar, P.  
909 I. W. de Bakker, M. J. Daly, and P. C. Sham. 2007. PLINK: A Tool Set for Whole-Genome  
910 Association and Population-Based Linkage Analyses. *Am. J. Hum. Genet.* 81:559–575.

- 911 R Development Core Team. 2016. R: A language and environment for statistical computing. R  
912 Foundation for Statistical Computing, Vienna, Austria.
- 913 Rodríguez, B., A. Rodríguez, F. Siverio, and M. Siverio. 2018. Factors affecting the spatial  
914 distribution and breeding habitat of an insular cliff-nesting raptor community. *Current*  
915 *Zoology* 64:173–181.
- 916 Rodríguez, A., B. Rodríguez, T. Montelongo, J. Garcia-Porta, T. Pipa, M. Carty, J. Danielsen, J.  
917 Nunes, C. Silva, P. Geraldés, F.M. Medina, and J.C. Illera. 2020. Cryptic differentiation in the  
918 Manx Shearwater hinders the identification of a new endemic subspecies. *J. Avian Biol.*  
919 <https://doi.org/10.1111/jav.02633>
- 920 Romano, A., R. Séchaud, and A. Roulin. 2020. Geographical variation in bill size provides  
921 evidence for Allen’s rule in a cosmopolitan raptor. *Global Ecol Biogeogr.* 29: 65– 75.
- 922 Romano, A., R. Séchaud, and A. Roulin. 2021. Evolution of wing length and melanin-based  
923 coloration in insular populations of a cosmopolitan raptor. *J. Biogeogr.* 48:961–973.  
924 Blackwell Publishing Ltd.
- 925 Senfeld, T., T. J. Shannon, H. van Grouw, D. M. Pajmans, E. S. Tavares, A. J. Baker, A. C. Lees,  
926 and J. M. Collinson. 2020. Taxonomic status of the extinct Canary Islands Oystercatcher  
927 *Haematopus meadewaldoi*. *Ibis (Lond. 1859)*. 162:1068–1074. Blackwell Publishing Ltd.
- 928 Siverio, F. 1998. Distribución y estatus de *Tyto alba* (Scopoli, 1769) en Tenerife, islas Canarias  
929 (Aves, Tytonidae). *Vieraea* 26:121-131.
- 930 Siverio, F. 2007. Lechuza común, *Tyto alba*. In Lorenzo, J. A. (Ed.): Atlas de las aves nidificantes  
931 en el archipiélago canario (1997-2003), pp. 304-310. Dirección General de Conservación  
932 de la Naturaleza-Sociedad Española de Ornitología. Madrid.
- 933 Stamatakis, A. 2014. RAxML version 8: A tool for phylogenetic analysis and post-analysis of  
934 large phylogenies. *Bioinformatics* 30:1312–1313. Oxford University Press.
- 935 Steinbauer, M. J., R. Field, J. A. Grytnes, P. Trigas, C. Ah-Peng, F. Attorre, H. J. B. Birks, P. A. V.  
936 Borges, P. Cardoso, C. H. Chou, M. De Sanctis, M. M. de Sequeira, M. C. Duarte, R. B. Elias,  
937 J. M. Fernández-Palacios, R. Gabriel, R. E. Gereau, R. G. Gillespie, J. Greimler, D. E. V. Harter,  
938 T. J. Huang, S. D. H. Irl, D. Jeanmonod, A. Jentsch, A. S. Jump, C. Kueffer, S. Nogué, R. Otto,  
939 J. Price, M. M. Romeiras, D. Strasberg, T. Stuessy, J. C. Svenning, O. R. Vetaas, and C.  
940 Beierkuhnlein. 2016. Topography-driven isolation, speciation and a global increase of  
941 endemism with elevation. *Glob. Ecol. Biogeogr.* 25:1097–1107. Blackwell Publishing Ltd.
- 942 Surendran, P., F. Drenos, R. Young, H. Warren, J. P. Cook, A. K. Manning, N. Grarup, X. Sim, D. R.  
943 Barnes, K. Witkowska, J. R. Staley, V. Tragante, T. Tukiainen, H. Yaghootkar, N. Masca, D. F.  
944 Freitag, T. Ferreira, O. Giannakopoulou, A. Tinker, M. Harakalova, E. Mihailov, C. Liu, A. T.  
945 Kraja, S. F. Nielsen, A. Rasheed, M. Samuel, W. Zhao, L. L. Bonnycastle, A. U. Jackson, N.  
946 Narisu, A. J. Swift, L. Southam, J. Marten, J. R. Huyghe, A. Stančáková, C. Fava, T. Ohlsson,  
947 A. Matchan, K. E. Stirrups, J. Bork-Jensen, A. P. Gjesing, J. Kontto, M. Perola, S. Shaw-  
948 Hawkins, A. S. Havulinna, H. Zhang, L. A. Donnelly, C. J. Groves, N. W. Rayner, M. J. Neville,  
949 N. R. Robertson, A. M. Yiorkas, K. H. Herzig, E. Kajantie, W. Zhang, S. M. Willems, L.  
950 Lannfelt, G. Malerba, N. Soranzo, E. Trabetti, N. Verweij, E. Evangelou, A. Moayyeri, A. C.  
951 Vergnaud, C. P. Nelson, A. Poveda, T. V. Varga, M. Caslake, A. J. M. De Craen, S. Trompet, J.  
952 Luan, R. A. Scott, S. E. Harris, D. C. M. Liewald, R. Marioni, C. Menni, A. E. Farmaki, G.  
953 Hallmans, F. Renström, J. E. Huffman, M. Hassinen, S. Burgess, R. S. Vasan, J. F. Felix, M.  
954 Uria-Nickelsen, A. Malarstig, D. F. Reilly, M. Hoek, T. F. Vogt, H. Lin, W. Lieb, M. Traylor, H. S.  
955 Markus, H. M. Highland, A. E. Justice, E. Marouli, J. Lindström, M. Uusitupa, P. Komulainen,  
956 T. A. Lakka, R. Rauramaa, O. Polasek, I. Rudan, O. Rolandsson, P. W. Franks, G. Dedoussis,  
957 T. D. Spector, P. Jousilahti, S. Männistö, I. J. Deary, J. M. Starr, C. Langenberg, N. J.  
958 Wareham, M. J. Brown, A. F. Dominiczak, J. M. Connell, J. W. Jukema, N. Sattar, I. Ford, C. J.  
959 Packard, T. Esko, R. Mägi, A. Metspalu, R. A. De Boer, P. Van Der Meer, P. Van Der Harst, G.

- 960 Gambaro, E. Ingelsson, L. Lind, P. I. W. De Bakker, M. E. Numans, I. Brandslund, C.  
961 Christensen, E. R. B. Petersen, E. Korpi-Hyövälti, H. Oksa, J. C. Chambers, J. S. Kooner, A. I.  
962 F. Blakemore, S. Franks, M. R. Jarvelin, L. L. Husemoen, A. Linneberg, T. Skaaby, B.  
963 Thuesen, F. Karpe, J. Tuomilehto, A. S. F. Doney, A. D. Morris, C. N. A. Palmer, O. L. Holmen,  
964 K. Hveem, C. J. Willer, T. Tuomi, L. Groop, A. Käräjämäki, A. Palotie, S. Ripatti, V. Salomaa,  
965 D. S. Alam, A. A. S. Majumder, E. Di Angelantonio, R. Chowdhury, M. I. McCarthy, N. Poulter,  
966 A. V. Stanton, P. Sever, P. Amouyel, D. Arveiler, S. Blankenberg, J. Ferrières, F. Kee, K.  
967 Kuulasmaa, M. Müller-Nurasyid, G. Veronesi, J. Virtamo, P. Deloukas, P. Elliott, E. Zeggini, S.  
968 Kathiresan, O. Melander, J. Kuusisto, M. Laakso, S. Padmanabhan, D. J. Porteous, C.  
969 Hayward, G. Scotland, F. S. Collins, K. L. Mohlke, T. Hansen, O. Pedersen, M. Boehnke, H. M.  
970 Stringham, P. Frossard, C. Newton-Cheh, M. D. Tobin, B. G. Nordestgaard, M. J. Caulfield, A.  
971 Mahajan, A. P. Morris, M. Tomaszewski, N. J. Samani, D. Saleheen, F. W. Asselbergs, C. M.  
972 Lindgren, J. Danesh, L. V. Wain, A. S. Butterworth, J. M. M. Howson, and P. B. Munroe. 2016.  
973 Trans-ancestry meta-analyses identify rare and common variants associated with blood  
974 pressure and hypertension. *Nat. Genet.* 48:1151–1161. Nature Publishing Group.
- 975 Thorpe, R. S., and M. Baez. 1993. Geographic variation in scalation of the lizard *Gallotia stehlini*  
976 within the island of Gran Canaria. *Biol. J. Linn. Soc.* 48:75–87. John Wiley & Sons, Ltd.
- 977 Tigano, A., and V. L. Friesen. 2016. Genomics of local adaptation with gene flow. *Mol. Ecol.*  
978 25:2144–2164.
- 979 Turcot, V., Y. Lu, H. M. Highland, C. Schurmann, A. E. Justice, R. S. Fine, J. P. Bradfield, T. Esko, A.  
980 Giri, M. Graff, X. Guo, A. E. Hendricks, T. Karaderi, A. Lempradl, A. E. Locke, A. Mahajan, E.  
981 Marouli, S. Sivapalaratnam, K. L. Young, T. Alfred, M. F. Feitosa, N. G. D. Masca, A. K.  
982 Manning, C. Medina-Gomez, P. Mudgal, M. C. Y. Ng, A. P. Reiner, S. Vedantam, S. M.  
983 Willems, T. W. Winkler, G. Abecasis, K. K. Aben, D. S. Alam, S. E. Alharthi, M. Allison, P.  
984 Amouyel, F. W. Asselbergs, P. L. Auer, B. Balkau, L. E. Bang, I. Barroso, L. Bastarache, M.  
985 Benn, S. Bergmann, L. F. Bielak, M. Blüher, M. Boehnke, H. Boeing, E. Boerwinkle, C. A.  
986 Böger, J. Bork-Jensen, M. L. Bots, E. P. Bottinger, D. W. Bowden, I. Brandslund, G. Breen, M.  
987 H. Brilliant, L. Broer, M. Brumat, A. A. Burt, A. S. Butterworth, P. T. Campbell, S. Cappellani,  
988 D. J. Carey, E. Catamo, M. J. Caulfield, J. C. Chambers, D. I. Chasman, Y. D. I. Chen, R.  
989 Chowdhury, C. Christensen, A. Y. Chu, M. Cocca, J. P. Cook, J. Corley, J. Corominas Galbany,  
990 A. J. Cox, D. S. Crosslin, G. Cuellar-Partida, A. D'Eustacchio, J. Danesh, G. Davies, P. I. W.  
991 Bakker, M. C. H. Groot, R. Mutsert, I. J. Deary, G. Dedoussis, E. W. Demerath, M. Heijer, A. I.  
992 Hollander, H. M. Ruijter, J. G. Dennis, J. C. Denny, E. Angelantonio, F. Drenos, M. Du, M. P.  
993 Dubé, A. M. Dunning, D. F. Easton, T. L. Edwards, D. Ellinghaus, P. T. Ellinor, P. Elliott, E.  
994 Evangelou, A. E. Farmaki, I. S. Farooqi, J. D. Faul, S. Fauser, S. Feng, E. Ferrannini, J.  
995 Ferrieres, J. C. Florez, I. Ford, M. Fornage, O. H. Franco, A. Franke, P. W. Franks, N. Friedrich,  
996 R. Frikke-Schmidt, T. E. Galesloot, W. Gan, I. Gandin, P. Gasparini, J. Gibson, V. Giedraitis, A.  
997 P. Gjesing, P. Gordon-Larsen, M. Gorski, H. J. Grabe, S. F. A. Grant, N. Grarup, H. L. Griffiths,  
998 M. L. Grove, V. Gudnason, S. Gustafsson, J. Haessler, H. Hakonarson, A. R. Hammerschlag,  
999 T. Hansen, K. M. Harris, T. B. Harris, A. T. Hattersley, C. T. Have, C. Hayward, L. He, N. L.  
1000 Heard-Costa, A. C. Heath, I. M. Heid, Ø. Helgeland, J. Hernesniemi, A. W. Hewitt, O. L.  
1001 Holmen, G. K. Hovingh, J. M. M. Howson, Y. Hu, P. L. Huang, J. E. Huffman, M. A. Ikram, E.  
1002 Ingelsson, A. U. Jackson, J. H. Jansson, G. P. Jarvik, G. B. Jensen, Y. Jia, S. Johansson, M. E.  
1003 Jørgensen, T. Jørgensen, J. W. Jukema, B. Kahali, R. S. Kahn, M. Kähönen, P. R. Kamstrup,  
1004 S. Kanoni, J. Kaprio, M. Karaleftheri, S. L. R. Kardia, F. Karpe, S. Kathiresan, F. Kee, L. A.  
1005 Kiemeny, E. Kim, H. Kitajima, P. Komulainen, J. S. Kooner, C. Kooperberg, T. Korhonen, P.  
1006 Kovacs, H. Kuivaniemi, Z. Kutalik, K. Kuulasmaa, J. Kuusisto, M. Laakso, T. A. Lakka, D.  
1007 Lamparter, E. M. Lange, L. A. Lange, C. Langenberg, E. B. Larson, N. R. Lee, T. Lehtimäki, C.  
1008 E. Lewis, H. Li, J. Li, R. Li-Gao, H. Lin, K. H. Lin, L. A. Lin, X. Lin, L. Lind, J. Lindström, A.  
1009 Linneberg, C. T. Liu, D. J. Liu, Y. Liu, K. S. Lo, A. Lophatananon, A. J. Lotery, A. Loukola, J.  
1010 Luan, S. A. Lubitz, L. P. Lytikäinen, S. Männistö, G. Marenne, A. L. Mazul, M. I. McCarthy, R.  
1011 McKean-Cowdin, S. E. Medland, K. Meidtner, L. Milani, V. Mistry, P. Mitchell, K. L. Mohlke, L.  
1012 Moilanen, M. Moitry, G. W. Montgomery, D. O. Mook-Kanamori, C. Moore, T. A. Mori, A. D.  
1013 Morris, A. P. Morris, M. Müller-Nurasyid, P. B. Munroe, M. A. Nalls, N. Narisu, C. P. Nelson, M.

- 1014 Neville, S. F. Nielsen, K. Nikus, P. R. Njølstad, B. G. Nordestgaard, D. R. Nyholt, J. R.  
1015 O’Connel, M. L. O’Donoghue, L. M. Olde Loohuis, R. A. Ophoff, K. R. Owen, C. J. Packard, S.  
1016 Padmanabhan, C. N. A. Palmer, N. D. Palmer, G. Pasterkamp, A. P. Patel, A. Pattie, O.  
1017 Pedersen, P. L. Peissig, G. M. Peloso, C. E. Pennell, M. Perola, J. A. Perry, J. R. B. Perry, T. H.  
1018 Pers, T. N. Person, A. Peters, E. R. B. Petersen, P. A. Peyser, A. Pirie, O. Polasek, T. J.  
1019 Polderman, H. Puolijoki, O. T. Raitakari, A. Rasheed, R. Rauramaa, D. F. Reilly, F. Renström,  
1020 M. Rheinberger, P. M. Ridker, J. D. Rioux, M. A. Rivas, D. J. Roberts, N. R. Robertson, A.  
1021 Robino, O. Rolandsson, I. Rudan, K. S. Ruth, D. Saleheen, V. Salomaa, N. J. Samani, Y.  
1022 Sapkota, N. Sattar, R. E. Schoen, P. J. Schreiner, M. B. Schulze, R. A. Scott, M. P. Segura-  
1023 Lepe, S. H. Shah, W. H. H. Sheu, X. Sim, A. J. Slater, K. S. Small, A. V. Smith, L. Southam, T.  
1024 D. Spector, E. K. Speliotes, J. M. Starr, K. Stefansson, V. Steinthorsdottir, K. E. Stirrups, K.  
1025 Strauch, H. M. Stringham, M. Stumvoll, L. Sun, P. Surendran, A. J. Swift, H. Tada, K. E.  
1026 Tansey, J. C. Tardif, K. D. Taylor, A. Teumer, D. J. Thompson, G. Thorleifsson, U.  
1027 Thorsteinsdottir, B. H. Thuesen, A. Tönjes, G. Tromp, S. Trompet, E. Tsafantakis, J.  
1028 Tuomilehto, A. Tybjaerg-Hansen, J. P. Tyrer, R. Uher, A. G. Uitterlinden, M. Uusitupa, S. W.  
1029 Laan, C. M. Duijn, N. Leeuwen, J. Van Setten, M. Vanhala, A. Varbo, T. V. Varga, R. Varma, D.  
1030 R. Velez Edwards, S. H. Vermeulen, G. Veronesi, H. Vestergaard, V. Vitart, T. F. Vogt, U.  
1031 Völker, D. Vuckovic, L. E. Wagenknecht, M. Walker, L. Wallentin, F. Wang, C. A. Wang, S.  
1032 Wang, Y. Wang, E. B. Ware, N. J. Wareham, H. R. Warren, D. M. Waterworth, J. Wessel, H. D.  
1033 White, C. J. Willer, J. G. Wilson, D. R. Witte, A. R. Wood, Y. Wu, H. Yaghoobkar, J. Yao, P. Yao,  
1034 L. M. Yerges-Armstrong, R. Young, E. Zeggini, X. Zhan, W. Zhang, J. H. Zhao, W. Zhao, W.  
1035 Zhou, K. T. Zondervan, J. I. Rotter, J. A. Pospisilik, F. Rivadeneira, I. B. Borecki, P. Deloukas,  
1036 T. M. Frayling, G. Lettre, K. E. North, C. M. Lindgren, J. N. Hirschhorn, and R. J. F. Loos. 2018.  
1037 Protein-altering variants associated with body mass index implicate pathways that control  
1038 energy intake and expenditure in obesity. *Nat. Genet.* 50:26–35. Nature Publishing Group.
- 1039 Uva, V., M. Päckert, A. Cibois, L. Fumagalli, and A. Roulin. 2018. Comprehensive molecular  
1040 phylogeny of barn owls and relatives (Family: Tytonidae), and their six major Pleistocene  
1041 radiations. *Mol. Phylogenet. Evol.* 125:127–137. Academic Press.
- 1042 van der Auwera, G. A., M. O. Carneiro, C. Hartl, R. Poplin, G. del Angel, A. Levy-Moonshine, T.  
1043 Jordan, K. Shakir, D. Roazen, J. Thibault, E. Banks, K. V. Garimella, D. Altshuler, S. Gabriel,  
1044 and M. A. DePristo. 2013. From FastQ data to high-confidence variant calls: The genome  
1045 analysis toolkit best practices pipeline. *Curr. Protoc. Bioinforma.* 43:11.10.1-11.10.33.  
1046 John Wiley & Sons, Inc., Hoboken, NJ, USA.
- 1047 Vuckovic, D., E. L. Bao, P. Akbari, C. A. Lareau, A. Mousas, T. Jiang, M. H. Chen, L. M. Raffield, M.  
1048 Tardaguila, J. E. Huffman, S. C. Ritchie, K. Megy, H. Ponstingl, C. J. Penkett, P. K. Albers, E.  
1049 M. Wigdor, S. Sakae, A. Moscati, R. Manansala, K. S. Lo, H. Qian, M. Akiyama, T. M. Bartz,  
1050 Y. Ben-Shlomo, A. Beswick, J. Bork-Jensen, E. P. Bottinger, J. A. Brody, F. J. A. van Rooij, K.  
1051 N. Chitrala, P. W. F. Wilson, H. Choquet, J. Danesh, E. Di Angelantonio, N. Dimou, J. Ding, P.  
1052 Elliott, T. Esko, M. K. Evans, S. B. Felix, J. S. Floyd, L. Broer, N. Grarup, M. H. Guo, Q. Guo, A.  
1053 Greinacher, J. Haessler, T. Hansen, J. M. M. Howson, W. Huang, E. Jorgenson, T. Kacprowski,  
1054 M. Kähönen, Y. Kamatani, M. Kanai, S. Karthikeyan, F. Koskeridis, L. A. Lange, T. Lehtimäki,  
1055 A. Linneberg, Y. Liu, L. P. Lytikäinen, A. Manichaikul, K. Matsuda, K. L. Mohlke, N.  
1056 Mononen, Y. Murakami, G. N. Nadkarni, K. Nikus, N. Pankratz, O. Pedersen, M. Preuss, B.  
1057 M. Psaty, O. T. Raitakari, S. S. Rich, B. A. T. Rodriguez, J. D. Rosen, J. I. Rotter, P. Schubert,  
1058 C. N. Spracklen, P. Surendran, H. Tang, J. C. Tardif, M. Ghanbari, U. Völker, H. Völzke, N. A.  
1059 Watkins, S. Weiss, N. Cai, K. Kundu, S. B. Watt, K. Walter, A. B. Zonderman, K. Cho, Y. Li, R.  
1060 J. F. Loos, J. C. Knight, M. Georges, O. Stegle, E. Evangelou, Y. Okada, D. J. Roberts, M.  
1061 Inouye, A. D. Johnson, P. L. Auer, W. J. Astle, A. P. Reiner, A. S. Butterworth, W. H.  
1062 Ouwehand, G. Lettre, V. G. Sankaran, and N. Soranzo. 2020. The Polygenic and Monogenic  
1063 Basis of Blood Traits and Diseases. *Cell* 182:1214-1231.e11. Cell Press.
- 1064 Wain, L. V., A. Vaez, R. Jansen, R. Joehanes, P. J. Van Der Most, A. M. Erzurumluoglu, P. F.  
1065 O’Reilly, C. P. Cabrera, H. R. Warren, L. M. Rose, G. C. Verwoert, J. J. Hottenga, R. J.  
1066 Strawbridge, T. Esko, D. E. Arking, S. J. Hwang, X. Guo, Z. Kutalik, S. Trompet, N. Shrine, A.

- 1067 Teumer, J. S. Ried, J. C. Bis, A. V. Smith, N. Amin, I. M. Nolte, L. P. Lyytikäinen, A. Mahajan,  
1068 N. J. Wareham, E. Hofer, P. K. Joshi, K. Kristiansson, M. Traglia, A. S. Havulinna, A. Goel, M.  
1069 A. Nalls, S. Söber, D. Vuckovic, J. Luan, F. M. Del Greco, K. L. Ayers, J. Marrugat, D. Ruggiero,  
1070 L. M. Lopez, T. Niiranen, S. Enroth, A. U. Jackson, C. P. Nelson, J. E. Huffman, W. Zhang, J.  
1071 Marten, I. Gandin, S. E. Harris, T. Zemunik, Y. Lu, E. Evangelou, N. Shah, M. H. De Borst, M.  
1072 Mangino, B. P. Prins, A. Campbell, R. Li-Gao, G. Chauhan, C. Oldmeadow, G. Abecasis, M.  
1073 Abedi, C. M. Barbieri, M. R. Barnes, C. Batini, J. Beilby, T. Blake, M. Boehnke, E. P. Bottinger,  
1074 P. S. Braund, M. Brown, M. Brumat, H. Campbell, J. C. Chambers, M. Cocca, F. Collins, J.  
1075 Connell, H. J. Cordell, J. J. Damman, G. Davies, E. J. De Geus, R. De Mutsert, J. Deelen, Y.  
1076 Demirkale, A. S. F. Doney, M. Dörr, M. Farrall, T. Ferreira, M. Frånberg, H. Gao, V. Giedraitis,  
1077 C. Gieger, F. Giulianini, A. J. Gow, A. Hamsten, T. B. Harris, A. Hofman, E. G. Holliday, J. Hui,  
1078 M. R. Jarvelin, Å. Johansson, A. D. Johnson, P. Jousilahti, A. Jula, M. Kähönen, S. Kathiresan,  
1079 K. T. Khaw, I. Kolcic, S. Koskinen, C. Langenberg, M. Larson, L. J. Launer, B. Lehne, D. C. M.  
1080 Liewald, L. Lin, L. Lind, F. Mach, C. Mamasoula, C. Menni, B. Mifsud, Y. Milaneschi, A.  
1081 Morgan, A. D. Morris, A. C. Morrison, P. J. Munson, P. Nandakumar, Q. T. Nguyen, T. Nutile,  
1082 A. J. Oldehinkel, B. A. Oostra, E. Org, S. Padmanabhan, A. Palotie, G. Paré, A. Pattie, B. W. J.  
1083 H. Penninx, N. Poulter, P. P. Pramstaller, O. T. Raitakari, M. Ren, K. Rice, P. M. Ridker, H.  
1084 Riese, S. Ripatti, A. Robino, J. I. Rotter, I. Rudan, Y. Saba, A. Saint Pierre, C. F. Sala, A. P.  
1085 Sarin, R. Schmidt, R. Scott, M. A. Seelen, D. C. Shields, D. Siscovick, R. Sorice, A. Stanton,  
1086 D. J. Stott, J. Sundström, M. Swertz, K. D. Taylor, S. Thom, I. Tzoulaki, C. Tzourio, A. G.  
1087 Uitterlinden, U. Völker, P. Vollenweider, S. Wild, G. Willemssen, A. F. Wright, J. Yao, S.  
1088 Thériault, D. Conen, J. Attia, P. Sever, S. Debette, D. O. Mook-Kanamori, E. Zeggini, T. D.  
1089 Spector, P. Van Der Harst, C. N. A. Palmer, A. C. Vergnaud, R. J. F. Loos, O. Polasek, J. M.  
1090 Starr, G. Grotto, C. Hayward, J. S. Kooner, C. M. Lindgren, V. Vitart, N. J. Samani, J.  
1091 Tuomilehto, U. Gyllenstein, P. Knekt, I. J. Deary, M. Ciullo, R. Elosua, B. D. Keavney, A. A.  
1092 Hicks, R. A. Scott, P. Gasparini, M. Laan, Y. Liu, H. Watkins, C. A. Hartman, V. Salomaa, D.  
1093 Toniolo, M. Perola, J. F. Wilson, H. Schmidt, J. H. Zhao, T. Lehtimäki, C. M. Van Duijn, V.  
1094 Gudnason, B. M. Psaty, A. Peters, R. Rettig, A. James, J. W. Jukema, D. P. Strachan, W.  
1095 Palmas, A. Metspalu, E. Ingelsson, D. I. Boomsma, O. H. Franco, M. Bochud, C. Newton-  
1096 Cheh, P. B. Munroe, P. Elliott, D. I. Chasman, A. Chakravarti, J. Knight, A. P. Morris, D. Levy,  
1097 M. D. Tobin, H. Snieder, M. J. Caulfield, and G. B. Ehret. 2017. Novel Blood Pressure Locus  
1098 and Gene Discovery Using Genome-Wide Association Study and Expression Data Sets from  
1099 Blood and the Kidney. *Hypertension* 70:e4–e19. Lippincott Williams and Wilkins.
- 1100 Warren, B. H., D. Simberloff, R. E. Ricklefs, R. Aguilée, F. L. Condamine, D. Gravel, H. Morlon, N.  
1101 Mouquet, J. Rosindell, J. Casquet, E. Conti, J. Cornuault, J. M. Fernández-Palacios, T. Hengl,  
1102 S. J. Norder, K. F. Rijdsdijk, I. Sanmartín, D. Strasberg, K. A. Triantis, L. M. Valente, R. J.  
1103 Whittaker, R. G. Gillespie, B. C. Emerson, and C. Thébaud. 2015. Islands as model systems  
1104 in ecology and evolution: Prospects fifty years after MacArthur-Wilson.
- 1105 Weir, B. S., L. R. Cardon, A. D. Anderson, D. M. Nielsen, and W. G. Hill. 2005. Measures of human  
1106 population structure show heterogeneity among genomic regions. *Genome Res.* 15:1468–  
1107 1476. Cold Spring Harbor Laboratory Press.
- 1108 Weir, B. S., and J. Goudet. 2017. A unified characterization of population structure and  
1109 relatedness. *Genetics* 206:2085–2103.
- 1110 Witt, K. E., and E. Huerta-Sánchez. 2019. Convergent evolution in human and domesticate  
1111 adaptation to high-altitude environments.
- 1112 Zheng, X., D. Levine, J. Shen, S. M. Gogarten, C. Laurie, and B. S. Weir. 2012. A high-performance  
1113 computing toolset for relatedness and principal component analysis of SNP data.  
1114 *Bioinformatics* 28:3326–3328.
- 1115 Zhu, Z., Y. Guo, H. Shi, C. L. Liu, R. A. Panganiban, W. Chung, L. J. O'Connor, B. E. Himes, S. Gazal,  
1116 K. Hasegawa, C. A. Camargo, L. Qi, M. F. Moffatt, F. B. Hu, Q. Lu, W. O. C. Cookson, and L.  
1117 Liang. 2020. Shared genetic and experimental links between obesity-related traits and  
1118 asthma subtypes in UK Biobank. *J. Allergy Clin. Immunol.* 145:537–549. Mosby Inc.

1119

## 1120 Tables & Figures

1121 **Table 1** – Genetic diversity and population differentiation of barn owls from the Mediterranean Basin  
 1122 and the Canary Islands. Right-hand-side of the table shows the matrix of population pairwise  $F_{ST}$ .

| Population     | Abbrev. | N  | #PA    | #rPA              | $H_o$            | $F_{IS}$         | $F_{IT}$         | $F_{ST}$ | EC    | WC    | MA     | PT    | IS    |
|----------------|---------|----|--------|-------------------|------------------|------------------|------------------|----------|-------|-------|--------|-------|-------|
| Eastern Canary | EC      | 10 | 324458 | 265175<br>(3829)  | 0.161<br>(0.013) | -0.015<br>(0.08) | 0.10<br>(0.07)   | EC       | 0.112 | 0.081 | 0.061  | 0.060 | 0.088 |
| Western Canary | WC      | 9  | 288313 | 288313            | 0.167<br>(0.006) | -0.030<br>(0.04) | 0.07<br>(0.03)   | WC       | 0.081 | 0.105 | 0.055  | 0.054 | 0.083 |
| Morocco        | MA      | 3  | 234524 | 692508<br>(13287) | 0.190<br>(0.001) | -0.04<br>(0.01)  | -0.06<br>(0.01)  | MA       | 0.061 | 0.055 | -0.013 | 0.007 | 0.034 |
| Portugal       | PT      | 9  | 669889 |                   | 0.182<br>(0.008) | -0.013<br>(0.04) | -0.01<br>(0.04)  | PT       | 0.060 | 0.054 | 0.007  | 0.014 | 0.039 |
| Israel         | IS      | 9  | 703392 | 703392            | 0.180<br>(0.002) | -0.036<br>(0.04) | -0.004<br>(0.01) | IS       | 0.088 | 0.083 | 0.034  | 0.039 | 0.050 |

1123 N – number of sampled individuals; #PA – private alleles in each population; #rPA – private alleles  
 1124 (SD) rarefied to 9 individuals per population (note that PT and MA were merged);  $H_o$  – mean  
 1125 observed heterozygosity (SD);  $F_{IS}$  - population level inbreeding coefficient (SD);  $F_{IT}$ : mean individual  
 1126 inbreeding coefficient relative to the meta-population (SD).  $F_{ST}$ : pairwise and population specific  $F_{ST}$ .

1127



1128 **Figure 1** – Population structure of barn owls from the Mediterranean Basin and the Canary Islands. **a)**  
 1129 Individual admixture proportion of each of  $K=4$  lineages as determined by sNMF. Black dots are  
 1130 located at the approximate centroid of each sampled population. Dashed lines encircle the island(s)  
 1131 sampled for each Canary population. **b)** PCA of the 40 individuals. Point shape and colour denote  
 1132 populations according to the legend. Axes one to three are shown and values in parenthesis indicate  
 1133 the percentage of variance explained by each axis.  
 1134



1135

1136 **Figure 2** – Genomic landscape of differentiation between insular and mainland barn owls. **a)**  
 1137 Genome-wide beta comparison between individuals from the Canary Islands (EC & WC) and from the  
 1138 mainland (PT & IS). Each dot represents a 100kb window. Dashed line indicates the 5 SD threshold  
 1139 used to identify genomic regions of high differentiation, emphasised in red. Alternating grey colours  
 1140 denote different scaffolds. Shaded vertical bar highlights Scaffold 100006. **b)** Zoom on Scaffold  
 1141 100006 and, in particular, the ~15 Mb long highly differentiated genomic region (background  
 1142 shading) over windows of 100 kb. From top to bottom, we see in this region a high  $F_{ST}^{Can}$  between  
 1143 insular and mainland barn owls, low absolute distance ( $d_{XY}$ ) between both islands (scaled with  
 1144 mean=0) and reduction of nucleotide diversity ( $\pi$ ) among insular individuals (red line) compared to  
 1145 the mainland (black line). The bottom triangular matrix shows pairwise LD ( $r^2$ ) between groups of 100  
 1146 SNP along the chromosome in insular owls. Darker pixels show higher LD. Grey triangles match each

1147 pixel in the matrix diagonal to the region it spans on the chromosome above. Red triangles indicate  
 1148 pixels that overlap the region of high differentiation.

1149

1150

1151

1152



1153

1154 **Figure 3** – Ecological divergence in barn owls from the Canary Islands. **a)** Sampling location of  
 1155 Western (WC; yellow) and Eastern (EC; red) Canary individuals, off the coast of north-western Africa.  
 1156 Sampled islands are named. Large dots indicate individuals sampled for WGS and population  
 1157 genomics analyses; small transparent dots are barn owl observations used in niche analysis. Dashed  
 1158 lines group islands according to barn owl taxonomy. **b)** Climatic niche occupied by the two Canary  
 1159 populations. The first axis varies from cold and wet to hot arid environments. **c)** Genome-wide  $F_{ST}$   
 1160 comparison between individuals from each Canary population. Each dot represents a 100kb window.  
 1161 Alternating grey colours denote different chromosomes. Dashed line indicates the 5 SD  $F_{ST}$  threshold  
 1162 used to identify genomic regions of high differentiation overlaid with  $F_{ST}^{WC}$ , highlighted in yellow and  
 1163  $F_{ST}^{EC}$  in red. Arrows denote the location of genes linked with response to hypoxia in WC; and the  
 1164 cluster of 4 genes linked to morphological ratios and the main gene related to blood pressure in EC.  
 1165 **d)** Same  $F_{ST}$  windows and threshold as in **c)** plotted against the difference between  $F_{ST}^{WC}$  and  $F_{ST}^{EC}$ ,  
 1166 clearly highlight the two sets of windows putatively under local adaptation.

1167
